# Supplementary material for: Changes of liver transcriptome profiles following oxidative stress in streptozotocin-induced diabetes in mice
Source: PeerJ. 2020 May 27;8:e8983. doi: 10.7717/peerj.8983 (PMC7261117; doi:10.7717/peerj.8983)
Supplement: Table S2 [file peerj-08-8983-s003.xlsx]

## Sheet: Sheet1
1326 differentially expressed genes
Name	C	T1	T2	T3	GeneName	Biotype	Position	NR:Seq-id
ENSMUSG00000087642	0.0898953	0	0	0	Ighe	IG_C_gene	chr12:113269260-113273248:-	gi|148686606|gb|EDL18553.1|
ENSMUSG00000105547	0.855625	0.110411	0.39316	0.301905	Iglc3	IG_C_gene	chr16:19065230-19065681:-	gi|125900|sp|P01845.1|LAC3_MOUSE
ENSMUSG00000076512	0.215967	0.0330941	0	0	Igkv9-123	IG_V_gene	chr6:67954228-67954714:-	gi|148666403|gb|EDK98819.1|
ENSMUSG00000076514	2.69155	1.03111	0.788726	1.2303	Igkv17-121	IG_V_gene	chr6:68036812-68037318:+	gi|148666405|gb|EDK98821.1|
ENSMUSG00000076526	1.43716	0.143821	0.36987	0.572014	Igkv12-98	IG_V_gene	chr6:68570763-68571235:+	gi|148666421|gb|EDK98837.1|
ENSMUSG00000076532	1.33614	0.557608	0.220618	0.554439	Igkv4-91	IG_V_gene	chr6:68768555-68769103:-	gi|5305016|emb|CAB46143.1|
ENSMUSG00000076534	0.722658	0.295301	0	0.330326	Igkv12-89	IG_V_gene	chr6:68834846-68835307:-	gi|5327133|emb|CAB46310.1|
ENSMUSG00000076541	1.27929	0.453057	0.496392	0.207914	Igkv4-79	IG_V_gene	chr6:69042972-69043505:-	gi|5304990|emb|CAB46128.1|
ENSMUSG00000076543	1.65319	0.0633324	0.501151	0.125945	Igkv4-74	IG_V_gene	chr6:69184826-69185397:-	gi|148666440|gb|EDK98856.1|
ENSMUSG00000076545	2.2279	0.651757	0.417501	0.277736	Igkv4-72	IG_V_gene	chr6:69226854-69227433:-	gi|55793810|gb|AAV65829.1|
ENSMUSG00000076555	0.791275	0.33449	0.238215	0.266071	Igkv4-57-1	IG_V_gene	chr6:69544359-69544907:-	gi|148666453|gb|EDK98869.1|
ENSMUSG00000076556	0.751742	1.91401	0.364616	0.105729	Igkv4-57	IG_V_gene	chr6:69575975-69576500:-	gi|148666454|gb|EDK98870.1|
ENSMUSG00000076562	0.63609	0.106334	0.168284	0	Igkv4-50	IG_V_gene	chr6:69700767-69701287:-	gi|148666460|gb|EDK98876.1|
ENSMUSG00000076563	2.23338	1.03971	0.60333	0.0689198	Igkv5-48	IG_V_gene	chr6:69726573-69727138:-	gi|148666461|gb|EDK98877.1|
ENSMUSG00000076570	0.645255	0.107866	0	0.250256	Igkv12-38	IG_V_gene	chr6:69943186-69943648:-	gi|5327135|emb|CAB46311.1|
ENSMUSG00000076580	1.52662	0.55451	0.219393	0.0689198	Igkv8-27	IG_V_gene	chr6:70171809-70172270:-	gi|148666479|gb|EDK98895.1|
ENSMUSG00000076594	1.16233	0.417041	0.220004	0.483782	Igkv6-13	IG_V_gene	chr6:70457501-70458036:-	gi|554093|gb|AAA38781.1|
ENSMUSG00000076598	2.32465	0.417041	0.660012	0.241891	Igkv3-7	IG_V_gene	chr6:70607437-70608036:+	gi|1680675|gb|AAB26956.1|
ENSMUSG00000076655	1.25374	0	0.500788	0.419512	Ighv4-1	IG_V_gene	chr12:113948282-113948796:-	gi|123837|sp|P01806.1|HVM36_MOUSE
ENSMUSG00000076672	10.7299	3.52906	4.03369	3.65078	Ighv3-6	IG_V_gene	chr12:114288152-114288582:-	gi|123882|sp|P18531.1|HVM60_MOUSE
ENSMUSG00000076695	2.87056	0.817547	0.815691	0.282748	Ighv1-18	IG_V_gene	chr12:114682632-114683065:-	gi|51921976|gb|AAU14133.1|
ENSMUSG00000076940	0.19465	0.852219	0.485541	0.881269	Iglv2	IG_V_gene	chr16:19260401-19260859:-	gi|126553|sp|P01728.1|LV2A_MOUSE
ENSMUSG00000093896	2.35077	0.508552	0.858494	0.775348	Ighv1-76	IG_V_gene	chr12:115847881-115848331:-	gi|2906086|gb|AAC04529.1|
ENSMUSG00000094006	3.04217	0.745877	0.64387	0.235975	Igkv4-59	IG_V_gene	chr6:69438218-69438757:-	gi|148666450|gb|EDK98866.1|
ENSMUSG00000094094	0.793047	0	0.102573	0.0644445	Igkv5-45	IG_V_gene	chr6:69775750-69776344:-	gi|5327165|emb|CAB46329.1|
ENSMUSG00000094102	0.666897	0.284364	0.0843818	0.141374	Ighv9-2	IG_V_gene	chr12:114109001-114109430:-	gi|148669240|gb|EDL01187.1|
ENSMUSG00000094164	1.17319	0	0.142258	0.214505	Ighv2-3	IG_V_gene	chr12:113611187-113611617:-	gi|148686583|gb|EDL18530.1|
ENSMUSG00000094345	0.653858	0	0.165464	0	Igkv14-126	IG_V_gene	chr6:67896172-67896642:+	gi|148666400|gb|EDK98816.1|
ENSMUSG00000094433	3.06129	1.11926	0.885675	1.44022	Igkv5-43	IG_V_gene	chr6:69823355-69823943:-	gi|50365951|gb|AAT76277.1|
ENSMUSG00000094689	0.347946	1.173	0.815691	1.48443	Ighv1-81	IG_V_gene	chr12:115920279-115920712:-	gi|148668898|gb|EDL01060.1|
ENSMUSG00000094694	3.47946	1.38628	1.06884	1.6258	Ighv1-9	IG_V_gene	chr12:114583569-114584002:-	gi|148686382|gb|EDL18329.1|
ENSMUSG00000094872	1.70104	0.388786	0.67123	0.246003	Igkv9-120	IG_V_gene	chr6:68049983-68050456:+	gi|2306845|gb|AAB97638.1|
ENSMUSG00000095200	1.52137	0.707429	0.432566	0.0639462	Ighv1-7	IG_V_gene	chr12:114538495-114538965:-	gi|148668858|gb|EDL01027.1|
ENSMUSG00000095285	1.7287	0	0	0	Ighv5-9	IG_V_gene	chr12:113661769-113662293:-	gi|148687030|gb|EDL18977.1|
ENSMUSG00000095565	0.441298	0.0338116	1.15047	0.134478	Ighv2-9-1	IG_V_gene	chr12:113769850-113770302:-	gi|148669263|gb|EDL01210.1|
ENSMUSG00000095682	0.0566988	1.35538	0.357506	0.345559	Igkv3-1	IG_V_gene	chr6:70703578-70704177:+	gi|110360|pir||S06731
ENSMUSG00000095753	0.166389	1.05387	0.699427	0.574645	Igkv4-53	IG_V_gene	chr6:69648824-69649363:-	gi|148666458|gb|EDK98874.1|
ENSMUSG00000095889	0.405938	0.0355455	1.20947	0	Ighv1-58	IG_V_gene	chr12:115312166-115312599:-	gi|148684241|gb|EDL16188.1|
ENSMUSG00000095923	0.173973	0	0	0	Ighv1-37	IG_V_gene	chr12:114896238-114896671:-	gi|90697|pir||PS0057
ENSMUSG00000096150	0.985848	0.426546	0.281273	0.0353435	Ighv1-85	IG_V_gene	chr12:116000028-116000461:-	gi|123874|sp|P06327.1|HVM52_MOUSE
ENSMUSG00000096326	1.48872	0.564096	0.131286	0.362929	Ighv1-78	IG_V_gene	chr12:115868773-115869227:-	gi|148686353|gb|EDL18300.1|
ENSMUSG00000096461	0	1.55514	0.727166	0.316289	Igkv14-130	IG_V_gene	chr6:67791046-67791511:+	gi|5305033|emb|CAB46155.1|
ENSMUSG00000096464	2.97806	0.460779	1.14994	1.02205	Ighv2-2	IG_V_gene	chr12:113588267-113588702:-	gi|148686585|gb|EDL18532.1|
ENSMUSG00000096499	2.06125	0.284274	0.749824	0.847975	Ighv1-5	IG_V_gene	chr12:114513330-114513807:-	gi|377648656|gb|AFB71083.1|
ENSMUSG00000096805	1.65275	0.0355455	0.196891	0.388778	Ighv9-1	IG_V_gene	chr12:114093928-114094358:-	gi|148669239|gb|EDL01186.1|
ENSMUSG00000096833	2.33624	0.62547	0.390739	0.752844	Igkv4-55	IG_V_gene	chr6:69607275-69607828:-	gi|148666456|gb|EDK98872.1|
ENSMUSG00000098814	2.29903	0.75615	0.326369	1.12778	Igkv19-93	IG_V_gene	chr6:68736297-68736780:-	gi|5327097|emb|CAB46297.1|
ENSMUSG00000103939	0.288313	0	0.0839038	0	Ighv3-4	IG_V_gene	chr12:114253617-114254051:-	gi|148705253|gb|EDL37200.1|
ENSMUSG00000065402	26.2146	88.6586	52.6543	108.643	Mir122	miRNA	chr18:65248861-65248926:+	.
ENSMUSG00000065422	5.57081	2.1013	2.18238	2.35053	Mir221	miRNA	chrX:19146294-19146388:-	.
ENSMUSG00000065468	1.19735	3.66955	2.67143	3.64869	Mir26b	miRNA	chr1:74394310-74394394:+	.
ENSMUSG00000065519	1.29531	0.226845	0.179503	0.451111	Mir10a	miRNA	chr11:96317165-96317274:+	.
ENSMUSG00000065528	0.74469	0	0	0	Mir320	miRNA	chr14:70443510-70443591:+	.
ENSMUSG00000076327	0	0.793958	1.79503	1.015	Gm26338	miRNA	chr6:128094917-128095026:-	.
ENSMUSG00000076987	0.555133	0	0.0897516	0	Gm24115	miRNA	chr2:109148589-109148698:-	gi|148706751|gb|EDL38698.1|
ENSMUSG00000080454	0	1.54818	0.360317	0.452758	Gm24195	miRNA	chr13:54578113-54578249:+	.
ENSMUSG00000093336	0.236685	1.01553	2.06637	1.44251	Mir1954	miRNA	chr2:32652329-32652414:+	.
ENSMUSG00000098569	0	0.891177	0.846229	1.06333	Mir7020	miRNA	chr4:139644042-139644111:+	.
ENSMUSG00000098851	2.70197	8.7225	5.94108	6.91638	Mir6353	miRNA	chr1:84218849-84218961:-	.
ENSMUSG00000099047	1.00106	0	0	0	Mir7029	miRNA	chr5:115580949-115581009:+	.
ENSMUSG00000099221	1.10026	0	0.177886	0	Mir6371	miRNA	chr6:50572398-50572508:+	.
ENSMUSG00000104689	1.9762	4.72411	5.84692	5.66079	Gm44482	miRNA	chr14:75262013-75262115:+	.
ENSMUSG00000105196	0.954134	0	0.154261	0	Mir142	miRNA	chr11:87756864-87756927:+	.
ENSMUSG00000106195	6.03546	0.580302	0.573993	2.74076	Gm44340	miRNA	chr14:70299922-70300007:-	.
ENSMUSG00000084539	0	0.387468	0.490568	0.423793	Gm25842	misc_RNA	chr9:102991895-102992216:+	gi|432119850|gb|ELK38641.1|
ENSMUSG00000088170	0.339248	0	0	0	Gm25219	misc_RNA	chr5:23487394-23487723:-	.
ENSMUSG00000092920	2.14262	5.12192	5.78504	5.39751	Mirt2	misc_RNA	chr15:76267135-76267419:-	gi|432116232|gb|ELK37276.1|
ENSMUSG00000098491	0.22368	0.959729	1.1934	1.90855	Gm27688	misc_RNA	chr4:116725899-116725989:+	.
ENSMUSG00000098654	1.00106	0	0.161847	0	Gm27676	misc_RNA	chr2:45112488-45112548:+	.
ENSMUSG00000064372	78.989	31.843	33.0072	21.108	mt-Tp	Mt_tRNA	chrMT:15356-15422:-	.
ENSMUSG00000041750	0.766473	0.122559	0.278012	0.0893655	Cd1d2	polymorphic_pseudogene	chr3:86986551-86989780:+	gi|110665733|ref|NP_031666.2|
ENSMUSG00000092517	0.226705	0.0198512	0	0	Art2a-ps	polymorphic_pseudogene	chr7:101552453-101560865:-	gi|1195513|gb|AAB35402.1|
ENSMUSG00000019836	0.20294	0.0248783	0.0492157	0	Amd-ps4	processed_pseudogene	chr4:51253025-51254027:-	gi|168229240|ref|NP_031470.3|
ENSMUSG00000050550	1.70083	0.278568	0.233791	0.201444	Gm11868	processed_pseudogene	chr4:18844202-18845679:-	gi|148673637|gb|EDL05584.1|
ENSMUSG00000055497	0.146861	0.594118	0.740807	0.322222	Gm9974	processed_pseudogene	chr16:17081999-17082691:-	gi|26352448|dbj|BAC39854.1|
ENSMUSG00000057657	23.6804	9.90458	11.648	9.08653	Rps18-ps3	processed_pseudogene	chr8:107262793-107263248:-	gi|332245592|ref|XP_003271942.1|
ENSMUSG00000059237	1.70428	0.354781	0.608269	0.235177	Ppp1r2-ps4	processed_pseudogene	chr9:66805306-66805938:-	gi|18859587|ref|NP_080076.1|
ENSMUSG00000062353	122.036	20.4808	21.5937	17.617	Gm15772	processed_pseudogene	chr5:3236431-3236868:+	gi|830036288|ref|XP_012581434.1|
ENSMUSG00000063696	42.6833	9.4816	11.3732	9.98687	Gm8730	processed_pseudogene	chr8:102864845-102865798:-	gi|610351283|gb|AHW68491.1|
ENSMUSG00000066443	0.761721	0.155632	0.287354	0.361077	Gm10163	processed_pseudogene	chr9:88390837-88391317:+	gi|31560385|ref|NP_062621.2|
ENSMUSG00000068120	0.230781	0.509244	0.044774	0.0562611	Gm10231	processed_pseudogene	chr17:5816200-5816640:-	gi|13385960|ref|NP_080744.1|
ENSMUSG00000068397	1.41178	0.361637	0.61321	0.462319	Gm10240	processed_pseudogene	chr15:68309819-68310301:+	gi|31560385|ref|NP_062621.2|
ENSMUSG00000072978	0.41353	0.0563272	0.0668579	0	Gm5830	processed_pseudogene	chr1:78967637-78968079:-	gi|589960220|ref|XP_006992688.1|
ENSMUSG00000075391	36.107	7.68821	5.22985	6.37042	Gm13443	processed_pseudogene	chr2:35340409-35340963:+	gi|165932331|ref|NP_079650.3|
ENSMUSG00000075609	0.310579	1.06411	0.741609	0.737733	Gm7935	processed_pseudogene	chr15:74080234-74081511:-	gi|583985425|ref|XP_006787964.1|
ENSMUSG00000078915	0.258475	0.55451	0.783546	0.748272	Hsp25-ps1	processed_pseudogene	chr13:45078498-45079127:-	gi|158937312|ref|NP_038588.2|
ENSMUSG00000080050	0.0561772	0	0	0	Gm14864	processed_pseudogene	chrX:9046087-9047173:-	gi|667282420|ref|XP_008574763.1|
ENSMUSG00000080242	14.8612	2.4148	1.82591	3.14808	Gm15487	processed_pseudogene	chr6:37806086-37806550:+	gi|6753144|ref|NP_033859.1|
ENSMUSG00000080914	0.102081	0.025028	0.0198048	0.0248858	Gm7129	processed_pseudogene	chrX:13326023-13327019:-	gi|344254162|gb|EGW10266.1|
ENSMUSG00000080942	0.0226417	0.138782	0.428292	0.234588	Zfp36l1-ps	processed_pseudogene	chrX:38180728-38181626:+	gi|589920188|ref|XP_006973168.1|
ENSMUSG00000081022	0.176999	0	0.0214623	0	Gm15936	processed_pseudogene	chr5:33126802-33127261:+	gi|558171034|ref|XP_006099067.1|
ENSMUSG00000081046	0.155664	0.00908702	0.0431435	0	Gm12846	processed_pseudogene	chr4:98664366-98666137:+	gi|131888589|ref|NP_038642.2|
ENSMUSG00000081068	0.081501	0	0	0	Gm12804	processed_pseudogene	chr4:111290118-111291116:+	gi|667322140|ref|XP_008588440.1|
ENSMUSG00000081217	0.462611	0	0.11219	0.0352431	Gm15268	processed_pseudogene	chrX:141627959-141628468:+	gi|537195464|gb|ERE78095.1|
ENSMUSG00000081223	0.318994	1.39662	0.972532	1.22204	Gm12247	processed_pseudogene	chr11:58097104-58097773:-	gi|247300872|ref|NP_001156491.1|
ENSMUSG00000081480	0.108579	0.292834	0.0140436	0.291169	Gm13608	processed_pseudogene	chr2:31985059-31986464:+	gi|532099710|ref|XP_005335491.1|
ENSMUSG00000081546	0.134504	0	0	0	Gm14927	processed_pseudogene	chrX:120371212-120371665:+	gi|687604|gb|AAA85686.1|
ENSMUSG00000081611	0.23839	0.0899206	0.0088943	0.0670571	Gm13651	processed_pseudogene	chr2:77291331-77292440:+	gi|21450169|ref|NP_659055.1|
ENSMUSG00000081684	38.125	12.9716	13.1748	12.5743	Rps2-ps13	processed_pseudogene	chrX:52898588-52899469:+	gi|2920833|gb|AAC04625.1|
ENSMUSG00000081733	0.127395	0.0173525	0.288354	0.31057	Gm12852	processed_pseudogene	chr4:99103060-99103778:-	gi|337930|gb|AAA36597.1|
ENSMUSG00000081788	1.05165	0.240975	0.290793	0.155743	Gm5898	processed_pseudogene	chr7:63542479-63544549:+	gi|347300437|ref|NP_001184195.1|
ENSMUSG00000081873	0.12775	0	0.392429	0.389296	Gm15197	processed_pseudogene	chr10:42330786-42331263:-	gi|829961490|ref|XP_012602240.1|
ENSMUSG00000082057	0.0748891	0.0183613	0.021794	0	Gm15789	processed_pseudogene	chr1:66783913-66786445:+	gi|359811347|ref|NP_001241645.1|
ENSMUSG00000082120	0.0721804	1.32729	0.525142	0.747853	Gm15720	processed_pseudogene	chr6:146463326-146463607:-	gi|197129747|gb|ACH46245.1|
ENSMUSG00000082152	0.13661	0	0.0265038	0	Gm13655	processed_pseudogene	chr2:75632638-75633382:-	gi|344246917|gb|EGW03021.1|
ENSMUSG00000082283	0.216541	0	0.0350095	0	Gm14472	processed_pseudogene	chr2:153413849-153414130:+	gi|148702541|gb|EDL34488.1|
ENSMUSG00000082399	0.911728	0.415883	0.452498	0.413519	Gm14036	processed_pseudogene	chr2:134803949-134804428:+	gi|148709224|gb|EDL41170.1|
ENSMUSG00000082457	0.0484255	0	0	0	Gm13776	processed_pseudogene	chr2:91716159-91717419:-	gi|795462474|ref|XP_011889298.1|
ENSMUSG00000082520	0.420964	0.849979	0.960844	0.965883	Gm13349	processed_pseudogene	chr2:18338579-18338989:-	gi|795352491|ref|XP_011784609.1|
ENSMUSG00000082609	0.0472271	0.434216	0.366503	0.402965	Gm15464	processed_pseudogene	chr1:60117255-60117685:+	gi|697838097|ref|XP_009639412.1|
ENSMUSG00000083004	0.202872	0.0207251	0	0	Gm13413	processed_pseudogene	chr2:32406055-32406656:+	gi|296228203|ref|XP_002759698.1|
ENSMUSG00000083041	0	0.292189	0.23121	0.377687	Gm9835	processed_pseudogene	chr6:4893352-4893778:-	gi|52696123|pdb|1VKK|A
ENSMUSG00000083104	0.0796356	0.3124	0.556207	0.757147	Gm12917	processed_pseudogene	chr4:124718999-124719637:+	gi|6456753|gb|AAF09255.1|AF201925_1
ENSMUSG00000083218	0.100799	0.0318888	0.0252337	0.0277441	Gm16425	processed_pseudogene	chr8:19535454-19538583:+	gi|226442901|ref|NP_082727.1|
ENSMUSG00000083237	0.134208	0	0	0	Gm11698	processed_pseudogene	chr11:114908731-114909185:+	gi|663280330|ref|XP_008498220.1|
ENSMUSG00000083391	0.0706766	0.396079	0.235064	0.283063	Gm14148	processed_pseudogene	chr2:151374008-151375047:+	gi|74194852|dbj|BAE26016.1|
ENSMUSG00000083397	0.00538489	0.0924184	0.0835782	0.0984568	Gm5466	processed_pseudogene	chr2:181896823-181898712:+	gi|13096978|gb|AAH03283.1|
ENSMUSG00000083409	1.08691	0.393675	0	2.52929	Gm11340	processed_pseudogene	chr13:24291394-24291805:-	gi|545831221|ref|XP_005655963.1|
ENSMUSG00000083603	0.272236	0	0	0	Gm14810	processed_pseudogene	chrX:98544397-98544882:-	gi|674061792|ref|XP_008837629.1|
ENSMUSG00000083773	81.8775	4.39172	4.39334	3.5728	Gm13394	processed_pseudogene	chr2:28933610-28934609:-	gi|6679937|ref|NP_032110.1|
ENSMUSG00000083805	0.261519	0	0	0	Gm14848	processed_pseudogene	chrX:103299110-103299974:+	gi|562820748|ref|XP_006140312.1|
ENSMUSG00000083902	0.624293	0.160183	0.295758	0.247757	Gm15975	processed_pseudogene	chr5:55624190-55625591:+	gi|568984181|ref|XP_006517574.1|
ENSMUSG00000083936	0.152035	0.021927	0.00867546	0.0109012	Gm14829	processed_pseudogene	chrX:100329692-100330829:+	gi|17390992|gb|AAH18420.1|
ENSMUSG00000084020	0.125441	0.0205037	0	0.0203871	Wsb2-ps	processed_pseudogene	chr11:62750064-62751280:-	gi|589915076|ref|XP_006970873.1|
ENSMUSG00000084087	0.705134	0	0.182405	0.0286503	Gm13650	processed_pseudogene	chr2:77255991-77256423:-	gi|594079644|ref|XP_006063486.1|
ENSMUSG00000084088	0	0.340268	0.314131	0.5075	Gm12941	processed_pseudogene	chr4:127046383-127046602:+	gi|585711638|ref|XP_006900180.1|
ENSMUSG00000084277	2.06499	0.542456	0.715411	0.539372	Gm11702	processed_pseudogene	chr11:115657491-115657559:-	gi|344255702|gb|EGW11806.1|
ENSMUSG00000090319	0.186173	0	0.0200664	0.0252146	Gm4462	processed_pseudogene	chr16:20664116-20664607:+	gi|852787185|ref|XP_012884737.1|
ENSMUSG00000091083	0	0.134156	0.212316	0.244554	Gm4535	processed_pseudogene	chr7:141406637-141407194:+	gi|148686117|gb|EDL18064.1|
ENSMUSG00000091269	0.030245	0.111232	0.21271	0.258065	Gm6682	processed_pseudogene	chr12:4782170-4783515:+	gi|532078381|ref|XP_005324967.1|
ENSMUSG00000091383	10.4476	0	0.232984	0.146378	Hist1h2al	processed_pseudogene	chr13:51202727-51203065:-	gi|594659432|ref|XP_007178012.1|
ENSMUSG00000091730	0	0.0221551	0.0125224	0.0314702	Gm17230	processed_pseudogene	chr10:20625635-20629576:+	gi|2645205|gb|AAC39954.1|
ENSMUSG00000093384	0.291826	0.715497	1.69852	0.889288	Gm20689	processed_pseudogene	chr3:68900171-68900449:-	gi|148694185|gb|EDL26132.1|
ENSMUSG00000094497	6.91138	0.361637	0.429247	0.128422	Gm8210	processed_pseudogene	chr1:43189156-43189638:+	gi|148709224|gb|EDL41170.1|
ENSMUSG00000096403	2.61981	0.695605	0.655836	0.735798	Gm9825	processed_pseudogene	chr6:7982541-7983383:-	gi|344253644|gb|EGW09748.1|
ENSMUSG00000097906	4.73171	1.6853	1.63339	2.03945	Gm9625	processed_pseudogene	chr13:67810246-67811200:+	gi|148678339|gb|EDL10286.1|
ENSMUSG00000097989	0.0405475	0.186402	0.226167	0.123561	Gm4335	processed_pseudogene	chr15:93196595-93197598:+	gi|8393418|ref|NP_058704.1|
ENSMUSG00000097991	0.0101369	0.0869874	0.118	0.148274	Gm7656	processed_pseudogene	chr7:70490848-70491851:+	gi|472368647|ref|XP_004403848.1|
ENSMUSG00000098037	0.094042	0	0	0.0127367	Gm7765	processed_pseudogene	chr16:16365184-16366157:-	gi|537136478|gb|ERE66530.1|
ENSMUSG00000098057	0.142484	0.0374294	0.00987268	0	Gm6283	processed_pseudogene	chr10:127313149-127314148:+	gi|821100513|ref|XP_012384730.1|
ENSMUSG00000098492	0.434542	1.26167	1.10929	1.11511	Gm19353	processed_pseudogene	chr9:72289667-72290111:+	gi|426258947|ref|XP_004023064.1|
ENSMUSG00000098985	0.123446	0.605328	0.439081	0.484854	Gm27219	processed_pseudogene	chr9:36813133-36813874:-	gi|148693468|gb|EDL25415.1|
ENSMUSG00000099400	0.10969	0	0	0	Kat6b-ps1	processed_pseudogene	chr7:13653996-13657428:+	gi|33243891|gb|AAQ01512.1|
ENSMUSG00000099596	0.0439223	0	0	0	Zbed4-ps3	processed_pseudogene	chr7:13962972-13966215:-	gi|755495244|ref|XP_011246429.1|
ENSMUSG00000099901	1.37844	0	0.0400863	0	Zbed4-ps2	processed_pseudogene	chr7:13752831-13756278:+	gi|847043480|ref|XP_012807315.1|
ENSMUSG00000100228	0.0159271	0.11715	0.108151	0.29121	Gm29257	processed_pseudogene	chr1:133025801-133026439:+	gi|355557937|gb|EHH14717.1|
ENSMUSG00000100441	0.201036	0	0	0	Gm7266	processed_pseudogene	chr1:144312032-144312436:-	gi|472352055|ref|XP_004395705.1|
ENSMUSG00000100468	1.99744	0	0	0	Tmem167-ps1	processed_pseudogene	chr7:13719693-13719906:-	gi|12848734|dbj|BAB28068.1|
ENSMUSG00000100566	1.56942	0	0	0	Tmem167-ps2	processed_pseudogene	chr7:13848729-13848942:+	gi|12848734|dbj|BAB28068.1|
ENSMUSG00000100660	1.85102	0	0.0370225	0	Kat6b-ps2	processed_pseudogene	chr7:13813443-13815042:-	gi|537270949|gb|ERE91969.1|
ENSMUSG00000100774	0.775424	0.237647	0.188051	0	Gm7329	processed_pseudogene	chr1:65095227-65095436:+	gi|148694555|gb|EDL26502.1|
ENSMUSG00000100794	0.0207703	0.280084	0.141038	0.151905	Gm29667	processed_pseudogene	chr1:100282791-100283280:+	gi|576080555|ref|NP_001276655.1|
ENSMUSG00000101171	0.0948208	0	0.0153302	0	Gm7593	processed_pseudogene	chr1:13407012-13407655:-	gi|148682373|gb|EDL14320.1|
ENSMUSG00000101532	0.584336	0	0.0170906	0	Zbed4-ps1	processed_pseudogene	chr7:13639107-13642572:+	gi|755495244|ref|XP_011246429.1|
ENSMUSG00000102525	3.82327	0.462092	0.261182	0.984568	Gm37784	processed_pseudogene	chr3:69963282-69963470:+	gi|826321595|ref|XP_012509614.1|
ENSMUSG00000103059	0.0450899	0	0	0	Gm18186	processed_pseudogene	chr1:165493422-165495001:+	gi|114842387|ref|NP_663459.2|
ENSMUSG00000103483	0.0817934	0	0	0	Gm20162	processed_pseudogene	chr18:37434243-37435113:+	gi|189053520|dbj|BAG35686.1|
ENSMUSG00000103781	0.19762	0	0	0	Gm37523	processed_pseudogene	chr3:19913796-19914355:+	gi|70794742|ref|NP_001020594.1|
ENSMUSG00000105357	0.421288	0	0	0	Gm42647	processed_pseudogene	chr3:149210271-149210729:+	gi|755505780|ref|XP_011238673.1|
ENSMUSG00000105474	0.467515	0	0	0	Gm20159	processed_pseudogene	chr5:145623085-145623367:-	gi|6841244|gb|AAF28975.1|AF161415_1
ENSMUSG00000105865	0.392951	0	0.114355	0.0957958	Gm34144	processed_pseudogene	chr5:72572174-72572432:+	gi|13278223|gb|AAH03947.1|
ENSMUSG00000105977	0.853591	0.0402467	0.382168	0.320144	Gm43555	processed_pseudogene	chr3:55057347-55057656:-	gi|344241496|gb|EGV97599.1|
ENSMUSG00000106067	0.988726	0.105398	0.375308	0.340596	Gm7902	processed_pseudogene	chr5:133841573-133842519:-	gi|37497124|ref|NP_084151.2|
ENSMUSG00000107092	2.75026	0.67611	0.963014	0.726048	Gm7993	processed_pseudogene	chr5:95974240-95975623:+	gi|131888589|ref|NP_038642.2|
ENSMUSG00000107395	0.445919	0.996832	0.916022	1.08709	Gm44331	processed_pseudogene	chr6:114789390-114789777:+	gi|165970423|gb|AAI58237.1|
ENSMUSG00000107800	0.267827	2.2983	1.99186	1.08821	Gm44478	processed_pseudogene	chr6:128642999-128643112:-	gi|385654444|gb|AFI61952.1|
ENSMUSG00000108068	0.706766	0	0	0	Gm44075	processed_pseudogene	chr6:63783852-63784067:-	gi|444731925|gb|ELW72259.1|
ENSMUSG00000108344	0.0554125	0	0	0	Gm8952	processed_pseudogene	chr6:72073052-72074153:-	gi|118600998|ref|NP_033240.3|
ENSMUSG00000108518	0.996603	0.148089	0.292958	0.3129	Gm5587	processed_pseudogene	chr7:25419153-25419826:-	gi|29789124|ref|NP_067271.1|
ENSMUSG00000108525	0.188471	0	0	0	Gm7443	processed_pseudogene	chr6:83792602-83792979:-	gi|148666690|gb|EDK99106.1|
ENSMUSG00000108702	0.476947	0.141457	0.186559	0.121899	Gm9333	processed_pseudogene	chr7:134660335-134661657:+	gi|674048342|ref|XP_008830294.1|
ENSMUSG00000109609	0.154204	0.378075	0.677074	0.326462	Gm4972	processed_pseudogene	chr7:105412720-105413973:-	gi|755495592|ref|XP_011237086.1|
ENSMUSG00000109875	0.293177	0	0.0406283	0.0510517	Gm45456	processed_pseudogene	chr7:140315813-140316055:+	gi|625184080|ref|XP_007649289.1|
ENSMUSG00000110569	1.35877	0.114313	0.0258447	0.243565	Gm18860	processed_pseudogene	chr8:71704205-71704968:-	gi|4106061|gb|AAD02685.1|
ENSMUSG00000110658	0.34306	0.0350463	0	0	Gm45857	processed_pseudogene	chr8:122596899-122597254:-	gi|638258205|ref|NP_001279658.1|
ENSMUSG00000111326	0.193487	0.0632521	0.0625645	1.10062	AC151971.8	processed_pseudogene	chr9:44663928-44664716:-	gi|556722093|ref|XP_005956887.1|
ENSMUSG00000111572	0.0909512	0	0	0	AC102582.3	processed_pseudogene	chr9:23903900-23905018:+	gi|852799405|ref|XP_012889078.1|
ENSMUSG00000111870	0.248837	0	0	0.0303314	AC154699.2	processed_pseudogene	chr9:18289452-18289860:-	gi|537152285|gb|ERE72159.1|
ENSMUSG00000111920	0.30519	0.0162666	0	0.113219	CT010444.1	processed_pseudogene	chr12:44202405-44203171:-	gi|74186763|dbj|BAE34836.1|
ENSMUSG00000112003	0.306507	0.00853969	0.013515	0	AC159297.3	processed_pseudogene	chr12:77623549-77625009:-	gi|504161253|ref|XP_004591679.1|
ENSMUSG00000112064	0.236185	0	0	0	AC161114.2	processed_pseudogene	chr12:51995036-51995509:+	gi|148704825|gb|EDL36772.1|
ENSMUSG00000112163	0.234864	0.0590603	0.0525764	0.0367028	AC158606.2	processed_pseudogene	chr10:82430704-82432393:+	gi|558209260|ref|XP_006133350.1|
ENSMUSG00000112218	0.0556974	0.00620721	0.00982356	0	AC164561.1	processed_pseudogene	chr12:32710161-32712532:+	gi|26340944|dbj|BAC34134.1|
ENSMUSG00000112440	0.19239	0	0.0186629	0	AC155941.1	processed_pseudogene	chr10:53529657-53530185:-	gi|297277388|ref|XP_001107304.2|
ENSMUSG00000112528	0.0326461	0.160083	0.182094	0.348191	AC153521.1	processed_pseudogene	chr10:56100635-56102003:-	gi|344240918|gb|EGV97021.1|
ENSMUSG00000113137	0.113083	0.609961	0.702057	0.330815	AC157515.2	processed_pseudogene	chr12:55067752-55068201:-	gi|14589953|ref|NP_006223.2|
ENSMUSG00000113423	0.251785	0.877253	0.797013	0.872266	AC132954.2	processed_pseudogene	chr12:83875115-83875882:-	gi|524938566|ref|XP_005071697.1|
ENSMUSG00000113521	0.0959004	0.323301	0.267458	0.423747	AC160122.1	processed_pseudogene	chr13:51205263-51206111:-	gi|148686300|gb|EDL18247.1|
ENSMUSG00000113637	1.00466	0.429972	0.178769	0.210141	AC156572.1	processed_pseudogene	chr13:62813076-62814787:+	gi|15029730|gb|AAH11081.1|
ENSMUSG00000006638	5.45923	1.95877	2.68438	1.63714	Abhd1	processed_transcript	chr5:30950066-30955091:+	gi|15011864|ref|NP_067279.2|
ENSMUSG00000041674	0.00352832	0.0151387	0.0273813	0.0150527	BC006965	processed_transcript	chr11:112663927-112781976:-	gi|148702452|gb|EDL34399.1|
ENSMUSG00000046219	0.0200168	0.0027265	0	0	C230012O17Rik	processed_transcript	chr4:24960790-24967449:-	gi|74148998|dbj|BAE32171.1|
ENSMUSG00000053925	0.0426344	0	0.112257	0	Gm9929	processed_transcript	chr1:170868645-170881721:+	gi|148671118|gb|EDL03065.1|
ENSMUSG00000054391	0.00978599	0.0959729	0.170873	0.107356	4930517O19Rik	processed_transcript	chr14:100213142-100246280:+	gi|148668143|gb|EDL00473.1|
ENSMUSG00000073627	0.0442703	0.0213207	0.0889568	0.0982886	C130036L24Rik	processed_transcript	chr1:86359574-86373791:+	gi|74182969|dbj|BAE20455.1|
ENSMUSG00000075042	0.0168143	0	0	0.0409908	4930431P03Rik	processed_transcript	chr14:44955217-44961307:-	gi|148688736|gb|EDL20683.1|
ENSMUSG00000085016	0.141353	0	0.0548482	0	Gm11335	processed_transcript	chr13:23527011-23530943:-	gi|148700617|gb|EDL32564.1|
ENSMUSG00000085057	0	0.0220355	0.0383608	0.0109551	Gm13415	processed_transcript	chr2:24440418-24486855:+	gi|148676226|gb|EDL08173.1|
ENSMUSG00000085169	0.102867	0.496537	0.293124	0.219429	Gm10785	processed_transcript	chr16:91688911-91715642:+	gi|148671866|gb|EDL03813.1|
ENSMUSG00000085398	0.00812894	0.0697567	0.110397	0.336892	4931406G06Rik	processed_transcript	chr16:91044656-91056677:+	gi|19920334|ref|NP_083181.1|
ENSMUSG00000085596	0.0705716	0	0.00977977	0	Gm11476	processed_transcript	chr2:167553314-167607845:+	gi|148674573|gb|EDL06520.1|
ENSMUSG00000085669	0.126624	0.388071	0.491331	0.0192933	Gm14817	processed_transcript	chrX:73795215-73797616:+	gi|569010118|ref|XP_006528085.1|
ENSMUSG00000085743	0.0432748	0	0.0114488	0	8430419K02Rik	processed_transcript	chr11:18845851-18874309:-	gi|148675867|gb|EDL07814.1|
ENSMUSG00000085881	0.0470814	0.173151	0.243582	0.248685	Gm15912	processed_transcript	chr13:74008009-74009354:-	gi|148675219|gb|EDL07166.1|
ENSMUSG00000086127	0.0795112	0.00812271	0	0.00807654	Gm11934	processed_transcript	chr4:33303569-33310137:-	gi|148673538|gb|EDL05485.1|
ENSMUSG00000086638	0.0179023	0.395034	0.277859	0.425521	4930405A21Rik	processed_transcript	chr2:156714540-156720909:-	gi|148674257|gb|EDL06204.1|
ENSMUSG00000086799	0.10784	0	0.0130764	0	4930502E09Rik	processed_transcript	chr11:84829178-84830868:+	gi|148683796|gb|EDL15743.1|
ENSMUSG00000086873	0.052616	0.00921454	0.123955	0	Gm15672	processed_transcript	chr5:139147576-139150693:-	gi|148687226|gb|EDL19173.1|
ENSMUSG00000087117	0.111534	0	0.0270484	0	Gm11523	processed_transcript	chr11:96862997-96873954:-	.
ENSMUSG00000087135	0.0976253	0.0149598	0.0236755	0	Gm16096	processed_transcript	chr9:40780742-40784181:-	gi|148693576|gb|EDL25523.1|
ENSMUSG00000087168	0.0338261	0.0129585	0.00205083	0	Gm15983	processed_transcript	chr16:5254786-5289621:+	gi|12840043|dbj|BAB24740.1|
ENSMUSG00000087221	0.00142841	0.0227641	0.0387979	0.0278581	BC037032	processed_transcript	chr15:4020114-4027405:-	gi|148671450|gb|EDL03397.1|
ENSMUSG00000090576	0.0271812	0.0999642	0.143137	0.0757303	Gm17055	processed_transcript	chr6:108656917-108659537:+	gi|12859797|dbj|BAB31781.1|
ENSMUSG00000091475	0.052811	0	0.00731851	0	2810468N07Rik	processed_transcript	chr17:25570811-25575043:+	gi|148690484|gb|EDL22431.1|
ENSMUSG00000092591	0.0457756	0	0.00740081	0	Gm20429	processed_transcript	chr17:37246961-37263064:+	gi|33239260|ref|NP_666721.1|
ENSMUSG00000097322	0.00927148	0.0617005	0.0346906	0.0661931	A530083I20Rik	processed_transcript	chr9:122885080-122903531:-	gi|111601552|gb|AAI19592.1|
ENSMUSG00000100277	0.381064	0.119887	2.48289	0.0575473	1810053B23Rik	processed_transcript	chr16:93343281-93359543:-	gi|148671827|gb|EDL03774.1|
ENSMUSG00000107385	0.037509	0	0	0	C330024D21Rik	processed_transcript	chr5:67463897-67477632:+	gi|148705839|gb|EDL37786.1|
ENSMUSG00000107497	0.0697682	0	0	0.00531515	Gm44957	processed_transcript	chr6:116335233-116337949:-	gi|148666327|gb|EDK98743.1|
ENSMUSG00000000157	0.110926	0	0.00672526	0.025352	Itgb2l	protein_coding	chr16:96422288-96443619:-	gi|148671723|gb|EDL03670.1|
ENSMUSG00000000739	0.280979	3.32029	1.2824	1.52999	Sult5a1	protein_coding	chr8:123140192-123158315:-	gi|755527072|ref|XP_011246761.1|
ENSMUSG00000001103	0.726425	0.2846	0.210675	1.98087	Sebox	protein_coding	chr11:78503447-78505081:+	gi|10198600|ref|NP_032785.1|
ENSMUSG00000001225	0.0191756	0	0.00155011	0	Slc26a3	protein_coding	chr12:31390871-31473917:+	gi|10946676|ref|NP_067328.1|
ENSMUSG00000001583	0.0703157	0.0337304	0	0.0223591	Tnk1	protein_coding	chr11:69851005-69858730:-	gi|264681505|ref|NP_114086.3|
ENSMUSG00000001657	0.0682808	0	0	0	Hoxc8	protein_coding	chr15:102990607-102994111:+	gi|471366946|ref|XP_004374005.1|
ENSMUSG00000001661	0.109889	0	0.0409995	0.0412145	Hoxc6	protein_coding	chr15:102998257-103011881:+	gi|511910465|ref|XP_004774628.1|
ENSMUSG00000002324	0.437022	2.26556	0.948467	1.07443	Rec8	protein_coding	chr14:55618037-55625395:+	gi|31982699|ref|NP_064386.2|
ENSMUSG00000003476	0.0437739	0.00975678	0.0173713	0.00970132	Crhr2	protein_coding	chr6:55090049-55133016:-	gi|568599840|ref|NP_001275547.1|
ENSMUSG00000004552	1.33559	0.0511654	0.0373729	0.082182	Ctse	protein_coding	chr1:131638306-131675505:+	gi|166235886|ref|NP_031825.2|
ENSMUSG00000004791	0.0245408	0	0	0	Pgf	protein_coding	chr12:85166635-85177790:-	gi|755542289|ref|XP_011242317.1|
ENSMUSG00000004892	0.0150257	0	0	0	Bcan	protein_coding	chr3:87987531-88000230:-	gi|157951688|ref|NP_031555.2|
ENSMUSG00000004939	0.0329367	0	0	0	Nmrk2	protein_coding	chr10:81198170-81202051:-	gi|110625739|ref|NP_081396.1|
ENSMUSG00000005237	0.0557556	0.00833544	0.0204472	0.0273506	Dnah2	protein_coding	chr11:69420809-69549110:-	gi|172044538|sp|P0C6F1.1|DYH2_MOUSE
ENSMUSG00000005994	0.0215929	0	0	0	Tyrp1	protein_coding	chr4:80834123-80851719:+	gi|13654241|ref|NP_112479.1|
ENSMUSG00000006403	0.351238	0.166007	0.119047	0.14701	Adamts4	protein_coding	chr1:171250421-171260637:+	gi|27370274|ref|NP_766433.1|
ENSMUSG00000006724	0.0237236	0	0	0.0674739	Cyp27b1	protein_coding	chr10:127048250-127053006:+	gi|2443371|dbj|BAA22434.1|
ENSMUSG00000006777	2.62077	0.58197	0.95888	0.206099	Krt23	protein_coding	chr11:99477974-99493137:-	gi|15431281|ref|NP_203537.1|
ENSMUSG00000007805	0.0929885	0.0157234	0.0279944	0.015634	Twist2	protein_coding	chr1:91801461-91848028:+	gi|6681177|ref|NP_031881.1|
ENSMUSG00000009092	1.16941	0.494552	0.18824	4.38832	Derl3	protein_coding	chr10:75893413-75895941:+	gi|18859601|ref|NP_077760.1|
ENSMUSG00000009350	0.859018	0.00364383	0.0201836	0.0797086	Mpo	protein_coding	chr11:87793581-87804413:+	gi|226823250|ref|NP_034954.2|
ENSMUSG00000009731	0.00769997	0.0330378	0.0522858	0.0563143	Kcnd1	protein_coding	chrX:7822289-7838280:+	gi|6680526|ref|NP_032449.1|
ENSMUSG00000011267	0.0449666	0.232747	0.222947	0.219244	Zfp296	protein_coding	chr7:19577287-19580656:+	gi|294997324|ref|NP_071854.2|
ENSMUSG00000012705	0.0451185	0	0	0	Retn	protein_coding	chr8:3655770-3660110:+	gi|12667798|ref|NP_075360.1|
ENSMUSG00000013928	0.083696	0	0	0.00510097	Thap8	protein_coding	chr7:30280094-30290237:+	gi|12839128|dbj|BAB24441.1|
ENSMUSG00000014704	0.189214	0.077319	0.0222483	0.0629014	Hoxa2	protein_coding	chr6:52162417-52164831:-	gi|488599464|ref|XP_004484860.1|
ENSMUSG00000014846	0.231305	0.0607621	0.694506	0.0469908	Tppp3	protein_coding	chr8:105467493-105471526:-	gi|332227513|ref|XP_003262935.1|
ENSMUSG00000015787	0.0318045	0	0	0	Abo	protein_coding	chr2:26842503-26864979:-	gi|568914574|ref|XP_006498520.1|
ENSMUSG00000016552	0.0222776	0.0630231	0.0531951	0.0501319	Foxred2	protein_coding	chr15:77940522-77956722:-	gi|269914150|ref|NP_001017983.2|
ENSMUSG00000017491	1.23109	5.79412	8.38885	2.59233	Rarb	protein_coding	chr14:16430842-16575472:-	gi|45593124|ref|NP_035373.1|
ENSMUSG00000017817	0.0167431	0.076237	0.0765683	0.055395	Jph2	protein_coding	chr2:163336242-163397993:-	gi|10947010|ref|NP_067541.1|
ENSMUSG00000019178	0.0632496	0.169173	0.3012	0.448563	Styxl1	protein_coding	chr5:135747220-135778385:-	gi|148687405|gb|EDL19352.1|
ENSMUSG00000019303	0.0671778	0.253922	0.141193	0.225183	Psmc3ip	protein_coding	chr11:101091823-101095436:-	gi|25092696|ref|NP_032975.1|
ENSMUSG00000019767	0.034891	0.00329021	0	0	Ccdc170	protein_coding	chr10:4482502-4562231:+	gi|307548930|ref|NP_001182601.1|
ENSMUSG00000019828	0.0119766	0	0.00129088	0	Grm1	protein_coding	chr10:10686059-11082356:-	gi|34328063|ref|NP_058672.1|
ENSMUSG00000019933	0.0689996	0	0	0	Mrln	protein_coding	chr10:70204664-70219711:+	gi|12844096|dbj|BAB26234.1|
ENSMUSG00000019982	0.0558261	0.0167601	0.00331557	0.0166648	Myb	protein_coding	chr10:21124935-21160984:-	gi|312032464|ref|NP_001185843.1|
ENSMUSG00000020000	3.28428	7.46716	0.00308714	12.3823	Moxd1	protein_coding	chr10:24223517-24302790:+	gi|31981183|ref|NP_067484.2|
ENSMUSG00000020020	0.0227175	0	0.00244858	0	Usp44	protein_coding	chr10:93831555-93858088:+	gi|332205971|ref|NP_001193780.1|
ENSMUSG00000020067	0.0034968	0.0385804	0.0203525	0.0298364	Mypn	protein_coding	chr10:63115795-63203952:-	gi|60360554|dbj|BAD90521.1|
ENSMUSG00000020081	0.0405655	0	0	0	Tacr2	protein_coding	chr10:62252438-62265990:+	gi|258613887|ref|NP_033340.3|
ENSMUSG00000020125	1.55144	0.139473	0.28093	0.302575	Elane	protein_coding	chr10:79886247-79888215:+	gi|114052444|ref|NP_056594.2|
ENSMUSG00000020299	0.035621	0	0.00493634	0	4930524B15Rik	protein_coding	chr11:31965592-31979651:+	gi|13385772|ref|NP_080538.1|
ENSMUSG00000020317	0.0650731	0	0	0	Theg	protein_coding	chr10:79576379-79587331:-	gi|33859638|ref|NP_035713.1|
ENSMUSG00000020323	0.0286386	0.00438849	0	0	Prss57	protein_coding	chr10:79781474-79790961:-	gi|111607469|ref|NP_001036175.1|
ENSMUSG00000020325	0.0249753	0.270451	0.157478	0.157289	Fstl3	protein_coding	chr10:79777272-79782630:+	gi|13878203|ref|NP_113557.1|
ENSMUSG00000020330	0.0655883	0.20216	0.0290854	0.219284	Hmmr	protein_coding	chr11:40701395-40733422:-	gi|226693396|ref|NP_038580.2|
ENSMUSG00000020524	0.00168417	0.0557447	0.0196049	0.0123173	Gria1	protein_coding	chr11:57011387-57330244:+	gi|227246|prf||1617121A
ENSMUSG00000020635	0.0797448	0	0.328767	0.194406	Fkbp1b	protein_coding	chr12:4833174-4841591:-	gi|123173728|ref|NP_058559.3|
ENSMUSG00000020805	2.60616	0.479865	0.659511	1.15517	Slc13a5	protein_coding	chr11:72241989-72267222:-	gi|51921291|ref|NP_001004148.1|
ENSMUSG00000020826	0.0530555	0.0226228	0	0	Nos2	protein_coding	chr11:78920787-78960254:+	gi|6754872|ref|NP_035057.1|
ENSMUSG00000020871	0.0716063	0.0114498	0.0241607	0	Dlx4	protein_coding	chr11:95140447-95146263:-	gi|178057354|ref|NP_031893.3|
ENSMUSG00000020892	0.00954582	0	0.0262366	0.0426641	Aloxe3	protein_coding	chr11:69125896-69149115:+	gi|226874908|ref|NP_035916.2|
ENSMUSG00000020907	0.117432	0	0	0	Rcvrn	protein_coding	chr11:67695326-67703333:+	gi|6677693|ref|NP_033064.1|
ENSMUSG00000021032	0.118136	0.050688	0.0229197	0	Ngb	protein_coding	chr12:87097531-87102539:-	gi|661311568|ref|NP_001281237.1|
ENSMUSG00000021070	0.0966212	0.046063	0.0312426	0.0458011	Bdkrb2	protein_coding	chr12:105563226-105595237:+	gi|148686811|gb|EDL18758.1|
ENSMUSG00000021200	0.270096	0.553023	0.615997	0.574396	Asb2	protein_coding	chr12:103321142-103356001:-	gi|23956122|ref|NP_075536.1|
ENSMUSG00000021214	0.219232	0.0310103	0.0327181	0	Akr1c18	protein_coding	chr13:4132615-4150654:-	gi|19527284|ref|NP_598827.1|
ENSMUSG00000021416	0.459348	0.123181	1.35767	0.0874863	Eci3	protein_coding	chr13:34946614-34963810:-	gi|21312210|ref|NP_081223.1|
ENSMUSG00000021573	5.41586	1.65065	1.80928	1.56832	Tppp	protein_coding	chr13:74009407-74035753:+	gi|33469051|ref|NP_878259.1|
ENSMUSG00000021728	0.596281	0.110754	0.267303	0.231262	Emb	protein_coding	chr13:117220625-117274098:+	gi|226437629|ref|NP_034460.3|
ENSMUSG00000021913	0.00885251	0.043409	0.0515246	0.0575497	Ogdhl	protein_coding	chr14:32322019-32347820:+	gi|124487483|ref|NP_001074599.1|
ENSMUSG00000021986	0.0748891	0.00918063	0	0.0228211	Amer2	protein_coding	chr14:60378286-60381003:+	gi|568988866|ref|XP_006519653.1|
ENSMUSG00000022583	0.0811413	0.227362	0.213646	0.226069	Ly6f	protein_coding	chr15:75268421-75272235:+	gi|6678750|ref|NP_032556.1|
ENSMUSG00000022589	0.331941	0	0	0	Cyp11b2	protein_coding	chr15:74851010-74856318:-	gi|226823208|ref|NP_034121.3|
ENSMUSG00000022613	0.135617	0.0604554	0.0119596	0.0300559	Miox	protein_coding	chr15:89334398-89337015:+	gi|116667858|pdb|2HUO|A
ENSMUSG00000022622	0.155639	0	0.0262571	0	Acr	protein_coding	chr15:89568326-89574585:+	gi|7304853|ref|NP_038483.1|
ENSMUSG00000022758	0.0178328	0	0.00247126	0.0558949	P2rx6	protein_coding	chr16:17561885-17577800:+	gi|227116251|ref|NP_035158.2|
ENSMUSG00000022824	0.0234503	0	0	0	Muc13	protein_coding	chr16:33794037-33819934:+	gi|148665438|gb|EDK97854.1|
ENSMUSG00000022878	0.206349	0	0.0285957	0.00898303	Adipoq	protein_coding	chr16:23146536-23158028:+	gi|87252711|ref|NP_033735.3|
ENSMUSG00000022899	0.219866	0.0695021	0.456075	0.524202	Slc15a2	protein_coding	chr16:36750178-36784962:-	gi|225543357|ref|NP_067276.2|
ENSMUSG00000023467	0.0193856	0.126745	0.0752204	0.0551358	Tulp2	protein_coding	chr7:45481877-45523632:+	gi|113930722|ref|NP_032833.2|
ENSMUSG00000023755	0.157383	0.0385871	0.386765	0.0383677	Rhebl1	protein_coding	chr15:98877778-98881404:-	gi|21312218|ref|NP_081243.1|
ENSMUSG00000024064	0.0323516	0.0116646	0.0978407	0.00695899	Galnt14	protein_coding	chr17:73493228-73710453:-	gi|148706466|gb|EDL38413.1|
ENSMUSG00000024112	0.092778	0.0153352	0.0313483	0.0355788	Cacna1h	protein_coding	chr17:25374285-25433783:-	gi|254826786|ref|NP_067390.4|
ENSMUSG00000024175	0.0465026	0.00814392	0	0	Tekt4	protein_coding	chr17:25471590-25476594:+	gi|110625871|ref|NP_082227.1|
ENSMUSG00000024365	1.90708	0.174904	0	0.17391	Cyp21a1	protein_coding	chr17:34801348-34804561:-	gi|74138930|dbj|BAE27263.1|
ENSMUSG00000024409	0.096583	0	0	0	Psors1c2	protein_coding	chr17:35533201-35534647:+	gi|5731131|gb|AAD48782.1|AF159090_1
ENSMUSG00000024411	1.00733	0.309334	0.244777	0.461364	Aqp4	protein_coding	chr18:15389394-15403684:-	gi|160415211|ref|NP_033830.2|
ENSMUSG00000024598	0.00971129	0.00238101	0.00282615	0.0248585	Fbn2	protein_coding	chr18:58008623-58209926:-	gi|118136302|ref|NP_034311.2|
ENSMUSG00000024600	0.335835	0.0301243	0.0834311	0.084867	Slc27a6	protein_coding	chr18:58556257-58612773:+	gi|148677904|gb|EDL09851.1|
ENSMUSG00000024681	0.178267	0	0.0209611	0.0526775	Ms4a3	protein_coding	chr19:11629496-11640851:-	gi|148709489|gb|EDL41435.1|
ENSMUSG00000024798	0.0898273	0	0.00290458	0.00364977	Htr7	protein_coding	chr19:35958734-36057507:-	gi|569006447|ref|XP_006526764.1|
ENSMUSG00000024803	0.0518963	0.353441	0.21815	0.147602	Ankrd1	protein_coding	chr19:36111965-36119844:-	gi|31560506|ref|NP_038496.2|
ENSMUSG00000024979	0.0586135	0	0.0103379	0.0129901	Tectb	protein_coding	chr19:55180733-55196313:+	gi|7363457|ref|NP_033374.2|
ENSMUSG00000024987	10.1028	436.058	460.892	46.3617	Cyp26a1	protein_coding	chr19:37697808-37701528:+	gi|178057351|ref|NP_031837.2|
ENSMUSG00000024989	0.0402994	0.0943147	0.103062	0.0982442	Cep55	protein_coding	chr19:38055025-38074425:+	gi|148709850|gb|EDL41796.1|
ENSMUSG00000025003	137.443	1.26344	10.4106	1.39281	Cyp2c39	protein_coding	chr19:39510862-39568529:+	gi|242332605|ref|NP_034133.2|
ENSMUSG00000025427	0.0230986	0.110804	0.0691691	0.00612076	Rnf165	protein_coding	chr18:77456110-77565147:-	gi|256818810|ref|NP_001157976.1|
ENSMUSG00000025592	0.0567247	0.0126434	0	0	Dach2	protein_coding	chrX:113297510-113836386:+	gi|15809024|ref|NP_291083.1|
ENSMUSG00000025916	0.18711	0.0819204	0.0518591	0.0896003	Ppp1r42	protein_coding	chr1:9968624-10009136:-	gi|22164766|ref|NP_663730.1|
ENSMUSG00000025955	0.188605	0	0.0117281	0	Akr1cl	protein_coding	chr1:65012689-65032759:-	gi|148540064|ref|NP_081858.2|
ENSMUSG00000025977	0.02317	0	0.00280953	0.00353033	Boll	protein_coding	chr1:55248658-55363469:-	gi|148667614|gb|EDL00031.1|
ENSMUSG00000026011	0.034944	0	0	0	Ctla4	protein_coding	chr1:60887000-60915832:+	gi|148667743|gb|EDL00160.1|
ENSMUSG00000026018	0.0190019	0	0	0	Ica1l	protein_coding	chr1:59982490-60043184:-	gi|568906941|ref|XP_006496328.1|
ENSMUSG00000026051	0.541593	0	0	0	1500015O10Rik	protein_coding	chr1:43730602-43742578:+	gi|228008374|ref|NP_077245.2|
ENSMUSG00000026062	0.0087435	0	0.00141361	0	Slc9a2	protein_coding	chr1:40680574-40769273:+	gi|148682634|gb|EDL14581.1|
ENSMUSG00000026163	0.00847943	0	0	0	Sphkap	protein_coding	chr1:83254139-83408200:-	gi|170014712|ref|NP_766018.3|
ENSMUSG00000026205	0.084538	0.00575749	0.0227796	0.171743	Slc23a3	protein_coding	chr1:75125541-75133890:-	gi|148667947|gb|EDL00364.1|
ENSMUSG00000026224	0.0213108	0	0	0	4933407L21Rik	protein_coding	chr1:85928483-85940624:+	gi|12855626|dbj|BAB30402.1|
ENSMUSG00000026357	0.0601326	0.233435	0.262494	0	Rgs18	protein_coding	chr1:144752683-144775435:-	gi|12738845|ref|NP_075019.1|
ENSMUSG00000026413	0.115469	0.0223504	0.0491276	0.256803	Pkp1	protein_coding	chr1:135871395-135919207:-	gi|9790161|ref|NP_062619.1|
ENSMUSG00000026468	0.0159576	0	0	0	Lhx4	protein_coding	chr1:155698031-155751684:-	gi|568908208|ref|XP_006529231.1|
ENSMUSG00000026525	0.170245	0.0260878	0.0206433	0.0453941	Opn3	protein_coding	chr1:175662421-175692776:-	gi|6753710|ref|NP_034228.1|
ENSMUSG00000026535	1.30142	0	0	0	Ifi202b	protein_coding	chr1:173962568-173982744:-	gi|164518893|ref|NP_036070.2|
ENSMUSG00000026587	0.00724078	0	0.0280958	0	Astn1	protein_coding	chr1:158362273-158691781:+	gi|327199303|ref|NP_001192133.1|
ENSMUSG00000026610	0.700026	0.251218	0.294208	0.301746	Esrrg	protein_coding	chr1:187608791-188214885:+	gi|40788377|dbj|BAA74855.2|
ENSMUSG00000026611	0.0957459	0.21736	0.512554	0.289607	Spata17	protein_coding	chr1:187044648-187215465:-	gi|29789229|ref|NP_083124.1|
ENSMUSG00000026683	0.0561757	0.00787036	0.0186835	0.0019564	Nuf2	protein_coding	chr1:169497934-169531464:-	gi|110625714|ref|NP_075773.2|
ENSMUSG00000026691	34.4759	0.444665	327.672	0.102823	Fmo3	protein_coding	chr1:162953800-162984528:-	gi|6679815|ref|NP_032056.1|
ENSMUSG00000026787	0.0103922	0	0.0268827	0	Gad2	protein_coding	chr2:22622205-22693874:+	gi|124517709|ref|NP_032104.2|
ENSMUSG00000026835	0.144415	0	0	0	Fcnb	protein_coding	chr2:28076378-28084885:-	gi|77404440|ref|NP_034320.1|
ENSMUSG00000026885	0.055642	0.0248041	0.0122672	0.0215803	Ttll11	protein_coding	chr2:35751241-35979913:-	gi|212720821|ref|NP_084050.1|
ENSMUSG00000027199	0.244177	0.0665191	0.118433	0.55393	Gatm	protein_coding	chr2:122594467-122611303:-	gi|13385454|ref|NP_080237.1|
ENSMUSG00000027208	0.0814696	0.00384128	0.0182377	0.00381945	Fgf7	protein_coding	chr2:126034658-126091185:+	gi|537151192|gb|ERE71530.1|
ENSMUSG00000027221	0.0113927	0.125696	0.0920959	0.0694341	Chst1	protein_coding	chr2:92599707-92615250:+	gi|12963845|ref|NP_076339.1|
ENSMUSG00000027376	0.0588631	0	0	0	Prom2	protein_coding	chr2:127526473-127541467:-	gi|20086520|gb|AAM10543.1|AF269062_1
ENSMUSG00000027408	0.255273	0.0974725	0.0487139	0.127524	Cpxm1	protein_coding	chr2:130390775-130397574:-	gi|228008326|ref|NP_062670.2|
ENSMUSG00000027456	0.0581983	0	0.155253	0.195084	Sdcbp2	protein_coding	chr2:151572622-151590005:+	gi|148673971|gb|EDL05918.1|
ENSMUSG00000027520	0.0128635	0.00394233	0.0561524	0.00391992	Zdbf2	protein_coding	chr1:63273265-63314576:+	gi|255982598|ref|NP_082949.1|
ENSMUSG00000027570	0.0158486	0.0420956	0.0486844	0.141667	Col9a3	protein_coding	chr2:180597790-180622189:+	gi|354481957|ref|XP_003503167.1|
ENSMUSG00000027676	0.0341846	0.00838135	0.0145908	0	Ccdc39	protein_coding	chr3:33812362-33844310:-	gi|21312922|ref|NP_080498.1|
ENSMUSG00000027869	0.0734221	0	0	0.00688433	Hsd3b6	protein_coding	chr3:98805504-98814443:-	gi|39979279|dbj|BAD05114.1|
ENSMUSG00000027870	5.94056	0.109603	0.033728	0.00605445	Hao2	protein_coding	chr3:98874521-98893239:-	gi|20379611|gb|AAH27754.1|
ENSMUSG00000027871	6.14487	0	0.0319332	0	Hsd3b1	protein_coding	chr3:98852194-98859794:-	gi|74144727|dbj|BAE27343.1|
ENSMUSG00000027978	0.0547594	0.0143849	0.0113828	0.00953541	Prss12	protein_coding	chr3:123446913-123506597:+	gi|6679485|ref|NP_032965.1|
ENSMUSG00000027985	0.00579053	0.0440113	0.031456	0.0268213	Lef1	protein_coding	chr3:131110471-131224356:+	gi|27735019|ref|NP_034833.2|
ENSMUSG00000028033	0.04368	0.00973584	0.015408	0.0161342	Kcnq5	protein_coding	chr1:21398403-21961942:-	gi|236463861|ref|NP_001153611.1|
ENSMUSG00000028037	1.08267	3.19597	0.338271	2.35198	Ifi44	protein_coding	chr3:151730922-151749960:-	gi|158937282|ref|NP_598632.2|
ENSMUSG00000028148	0.0330436	0.307861	0.115395	0.153056	Them5	protein_coding	chr3:94342099-94347352:+	gi|148706773|gb|EDL38720.1|
ENSMUSG00000028332	0.028372	0	0	0	Hemgn	protein_coding	chr4:46393989-46413506:-	gi|148670422|gb|EDL02369.1|
ENSMUSG00000028427	0.0971679	0.00441177	0.0279284	0.00438669	Aqp7	protein_coding	chr4:41033074-41048139:-	gi|6680712|ref|NP_031499.1|
ENSMUSG00000028786	0.0582995	0	0.00807911	0	Tmem54	protein_coding	chr4:129105548-129111626:+	gi|148698272|gb|EDL30219.1|
ENSMUSG00000028845	0.0267827	0.105065	0.1351	0.189348	Tekt2	protein_coding	chr4:126322121-126325688:-	gi|148225693|ref|NP_036032.2|
ENSMUSG00000028909	0.0658178	0.319235	0.301191	0.195336	Ptpru	protein_coding	chr4:131768457-131838288:-	gi|133778922|ref|NP_001076588.1|
ENSMUSG00000029005	0.0352296	0	0.00759437	0.00954274	Draxin	protein_coding	chr4:148098437-148130698:-	gi|568931882|ref|XP_006539233.1|
ENSMUSG00000029082	0.334441	0.105319	0.10715	0.0523599	Bst1	protein_coding	chr5:43818885-43843986:+	gi|134288869|ref|NP_033893.2|
ENSMUSG00000029206	0.228558	0.0578901	0.0329822	0.0552586	Nsun7	protein_coding	chr5:66259897-66298026:+	gi|148705820|gb|EDL37767.1|
ENSMUSG00000029275	0.0319342	0.0039148	0.0030978	0.0077851	Gfi1	protein_coding	chr5:107716657-107726036:-	gi|26354206|dbj|BAC40731.1|
ENSMUSG00000029286	0	0.0136355	0.0107898	0.027116	Enam	protein_coding	chr5:88487975-88506049:+	gi|148673413|gb|EDL05360.1|
ENSMUSG00000029377	0.416663	0.0634705	0.136323	0.141246	Ereg	protein_coding	chr5:91074622-91093646:+	gi|6679683|ref|NP_031976.1|
ENSMUSG00000029380	14.2376	2.79473	3.51204	38.8708	Cxcl1	protein_coding	chr5:90891241-90893115:+	gi|54887349|gb|AAH37997.1|
ENSMUSG00000029419	0.0344654	0	0.00786667	0.00988491	Gm996	protein_coding	chr2:25575416-25581757:-	gi|148762971|ref|NP_001005424.2|
ENSMUSG00000029530	0.0674528	0.00851222	0.0173205	0.0181368	Ccr9	protein_coding	chr9:123678439-123784330:+	gi|6753462|ref|NP_034043.1|
ENSMUSG00000029813	0.0286688	0	0	0	1600015I10Rik	protein_coding	chr6:48929895-48933687:+	gi|253735769|ref|NP_001074742.2|
ENSMUSG00000029814	0.113512	0.0152917	0.00363011	0	Igf2bp3	protein_coding	chr6:49085223-49214957:-	gi|225543383|ref|NP_076159.3|
ENSMUSG00000030041	0.0276061	0.0789651	0	0	M1ap	protein_coding	chr6:82946902-83030309:+	gi|188035879|ref|NP_149070.2|
ENSMUSG00000030134	0.0212346	0	0	0	Rasgef1a	protein_coding	chr6:118011438-118091546:+	gi|219518581|gb|AAI45233.1|
ENSMUSG00000030162	0.0427384	0.0908143	0	0	Olr1	protein_coding	chr6:129485244-129507165:-	gi|148667512|gb|EDK99928.1|
ENSMUSG00000030292	0.0833305	0	0	0	Smco2	protein_coding	chr6:146850104-146871406:+	gi|755518919|ref|XP_011239933.1|
ENSMUSG00000030329	0.32128	0.0437618	0.00692576	0.087026	Pianp	protein_coding	chr6:124996694-125003096:+	gi|672051046|ref|XP_008761507.1|
ENSMUSG00000030483	11.0304	5.47028	46.7129	0.822338	Cyp2b10	protein_coding	chr7:25897620-25926624:+	gi|148692283|gb|EDL24230.1|
ENSMUSG00000030510	0.037509	0.00766369	0	0	Cers3	protein_coding	chr7:66743504-66823691:+	gi|255958167|ref|NP_001157673.1|
ENSMUSG00000030543	0.00523531	0.147613	0.111728	0.127629	Mesp2	protein_coding	chr7:79810727-79813439:+	gi|111955348|ref|NP_032615.2|
ENSMUSG00000030546	0.0831883	0	0.00637084	0.0266844	Plin1	protein_coding	chr7:79720218-79732903:-	gi|148675107|gb|EDL07054.1|
ENSMUSG00000030683	0.0507663	0.127432	0.140703	0.206268	Sez6l2	protein_coding	chr7:126950563-126970606:+	gi|21450331|ref|NP_659175.1|
ENSMUSG00000030732	0.0639566	0.0102266	0.178032	0.186422	Chrdl2	protein_coding	chr7:100006172-100034728:+	gi|604723321|ref|NP_001278249.1|
ENSMUSG00000030827	0.94176	0.0262387	0	0.195671	Fgf21	protein_coding	chr7:45613886-45615490:-	gi|9910218|ref|NP_064397.1|
ENSMUSG00000030905	1.19152	0.147172	0.160129	0.149994	Crym	protein_coding	chr7:120186380-120202111:-	gi|582045024|pdb|4BV8|A
ENSMUSG00000031028	0.00849029	0.00148689	0.00117658	0	Tub	protein_coding	chr7:108950338-109034460:+	gi|589931636|ref|XP_006978620.1|
ENSMUSG00000031125	0.328626	0	0	0	3830403N18Rik	protein_coding	chrX:56136572-56153498:+	gi|21746153|ref|NP_081786.1|
ENSMUSG00000031258	0.03029	0	0.0685603	0	Xkrx	protein_coding	chrX:134149043-134162076:-	gi|59858577|ref|NP_899142.2|
ENSMUSG00000031270	0.34178	0.015518	0.0982356	0	4930513O06Rik	protein_coding	chrX:139086243-139093405:+	gi|569011499|ref|XP_006528679.1|
ENSMUSG00000031491	0.0210133	0	0	0	Chrna6	protein_coding	chr8:27403212-27413944:-	gi|31542395|ref|NP_067344.2|
ENSMUSG00000031538	0.068491	0.175922	0.169264	0.172934	Plat	protein_coding	chr8:22757727-22782844:+	gi|170763477|ref|NP_032898.2|
ENSMUSG00000031574	2.41754	0.379178	0.367255	0.310667	Star	protein_coding	chr8:25806555-25815982:+	gi|31543776|ref|NP_035615.2|
ENSMUSG00000031710	0.161744	0	0	0	Ucp1	protein_coding	chr8:83290352-83298452:+	gi|6678497|ref|NP_033489.1|
ENSMUSG00000031893	0.0594103	0.0112047	0.0177327	0	Tsnaxip1	protein_coding	chr8:105827731-105844680:+	gi|13161243|gb|AAK13524.1|AF343750_1
ENSMUSG00000031919	0.0701086	0	0	0	Tmed6	protein_coding	chr8:107061476-107065644:-	gi|13384864|ref|NP_079734.1|
ENSMUSG00000032101	0.0190809	0.050381	0.0583761	0	Ddx25	protein_coding	chr9:35536647-35558528:-	gi|163914388|ref|NP_038960.2|
ENSMUSG00000032118	0.00247988	0.0212805	0.0577349	0.0181368	Fez1	protein_coding	chr9:36821864-36878924:+	gi|148747561|ref|NP_898994.2|
ENSMUSG00000032281	0.160964	0.0519276	0.00273937	0.0103265	Acsbg1	protein_coding	chr9:54604877-54661870:-	gi|37360022|dbj|BAC97989.1|
ENSMUSG00000032323	0.63556	0	0.0020551	0	Cyp11a1	protein_coding	chr9:58006411-58027023:+	gi|148747566|ref|NP_062753.3|
ENSMUSG00000032357	0	0.143821	0.056903	0.0572014	Tinag	protein_coding	chr9:76951693-77045794:-	gi|227499499|ref|NP_036163.3|
ENSMUSG00000032482	0.0222259	0.074309	0.0107802	0.109598	Cspg5	protein_coding	chr9:110243783-110262576:+	gi|261878594|ref|NP_001159745.1|
ENSMUSG00000032484	6.27969	0.551334	0.145424	0.243644	Ngp	protein_coding	chr9:110419747-110423012:+	gi|164519050|ref|NP_032720.2|
ENSMUSG00000032494	0.0232893	0	0	0	Tdgf1	protein_coding	chr9:110939603-110946158:-	gi|134053945|ref|NP_035692.2|
ENSMUSG00000032496	1.44254	0.151888	0.103019	0.133045	Ltf	protein_coding	chr9:111019271-111042767:+	gi|31560677|ref|NP_032548.2|
ENSMUSG00000032511	0.0452898	0.0113888	0.0123915	0.00849308	Scn5a	protein_coding	chr9:119483408-119579016:-	gi|568963583|ref|XP_006512056.1|
ENSMUSG00000032816	0.192149	0.00131595	0.016661	0.0471048	Igdcc4	protein_coding	chr9:65101486-65137940:+	gi|28972802|dbj|BAC65817.1|
ENSMUSG00000033006	0.0300109	0	0	0	Sox10	protein_coding	chr15:79154913-79164490:-	gi|568991835|ref|XP_006520735.1|
ENSMUSG00000033122	0.109749	0	0	0.0356738	Hsd17b3	protein_coding	chr13:64058266-64089230:-	gi|153792573|ref|NP_032317.2|
ENSMUSG00000033177	0.0609857	0	0.0208798	0.0174911	Tmprss7	protein_coding	chr16:45656315-45693658:-	gi|303324537|ref|NP_766043.3|
ENSMUSG00000033187	0.0789308	0.00569183	0.00450396	0	BC016579	protein_coding	chr16:45626848-45654118:-	gi|225543189|ref|NP_663364.2|
ENSMUSG00000033419	0.0111521	0	0	0	Snap91	protein_coding	chr9:86765923-86880654:-	gi|354466442|ref|XP_003495683.1|
ENSMUSG00000033475	0.0809875	0.0110314	0	0	Tomm6	protein_coding	chr17:47686646-47688386:-	gi|13384732|ref|NP_079641.1|
ENSMUSG00000033578	0.137963	0.0390297	0	0.0258719	Tmem35a	protein_coding	chrX:134295225-134305969:+	gi|444518831|gb|ELV12416.1|
ENSMUSG00000033615	0.0325455	0	0	0	Cplx1	protein_coding	chr5:108518554-108550024:-	gi|15928669|gb|AAH14803.1|
ENSMUSG00000033826	0.0432696	0.0205332	0.016925	0.0153124	Dnah8	protein_coding	chr17:30624354-30875264:+	gi|153792273|ref|NP_038839.2|
ENSMUSG00000034394	0.0187171	0.0573631	0.043122	0.0598889	Lif	protein_coding	chr11:4257557-4272514:+	gi|6678694|ref|NP_032527.1|
ENSMUSG00000034488	0.0133943	0	0	0.00181408	Edil3	protein_coding	chr13:88821472-89323223:+	gi|83921564|ref|NP_001033076.1|
ENSMUSG00000034570	0.0119923	0	0	0	Inpp5j	protein_coding	chr11:3494375-3504821:-	gi|148708479|gb|EDL40426.1|
ENSMUSG00000034607	0.188568	0.0417381	0.0533521	0.0287314	Pof1b	protein_coding	chrX:112638431-112698651:-	gi|31657132|ref|NP_853557.1|
ENSMUSG00000034648	0.132032	0.00337202	0.0400244	0.0435871	Lrrn1	protein_coding	chr6:107529768-107570214:+	gi|50510957|dbj|BAD32464.1|
ENSMUSG00000034656	0.203228	0.0579133	0.0363157	0.064103	Cacna1a	protein_coding	chr8:84388440-84640246:+	gi|74181109|dbj|BAE27823.1|
ENSMUSG00000034739	0.0140897	0	0	0	Mfrp	protein_coding	chr9:44101729-44109187:+	gi|22128653|ref|NP_667337.1|
ENSMUSG00000034833	0.0743823	0.0356811	0.0172544	0.00788406	Tespa1	protein_coding	chr10:130322870-130364111:+	gi|166197692|ref|NP_899087.2|
ENSMUSG00000034853	0.978082	3.62181	2.72249	3.17718	Acot11	protein_coding	chr4:106744555-106804998:-	gi|568929288|ref|XP_006503244.1|
ENSMUSG00000034918	0.0443676	0.117845	0.100424	0.126189	Cdhr2	protein_coding	chr13:54701461-54736662:+	gi|282165827|ref|NP_001028536.2|
ENSMUSG00000034981	0.0963924	0.0467745	0.044805	0.0342695	Parm1	protein_coding	chr5:91517615-91626894:+	gi|74148095|dbj|BAE36224.1|
ENSMUSG00000035226	0.0984516	0.012572	0.0397931	0.0400018	Rims4	protein_coding	chr2:163859751-163918683:-	gi|33942097|ref|NP_898844.1|
ENSMUSG00000035239	0.688447	1.84851	2.29308	1.48525	Neu3	protein_coding	chr7:99811439-99828417:-	gi|7710068|ref|NP_057929.1|
ENSMUSG00000035274	0.0239281	0.00325927	0.00257907	0	Tpbg	protein_coding	chr9:85842380-85847040:+	gi|31543887|ref|NP_035757.2|
ENSMUSG00000035357	1.74206	0.462538	0.783719	0.836042	Pdzrn3	protein_coding	chr6:101149609-101377897:-	gi|256985136|ref|NP_061372.2|
ENSMUSG00000035385	0.241468	0.581066	0.65066	1.01381	Ccl2	protein_coding	chr11:82035571-82037453:+	gi|74142494|dbj|BAE31998.1|
ENSMUSG00000035407	0.0636753	0	0.0144127	0	Kank4	protein_coding	chr4:98754898-98817537:-	gi|26349213|dbj|BAC38246.1|
ENSMUSG00000035448	0.855377	0.0800752	0.283628	0.0189572	Ccr3	protein_coding	chr9:124021972-124031689:+	gi|157012009|ref|NP_034044.3|
ENSMUSG00000035615	0.0152929	0.00234344	0	0	Frmpd1	protein_coding	chr4:45184875-45285936:+	gi|124487185|ref|NP_001074641.1|
ENSMUSG00000035835	0.107451	0.0171813	0.0294571	0.0341673	Plppr3	protein_coding	chr10:79860475-79874634:-	gi|283945516|ref|NP_859009.2|
ENSMUSG00000035916	0.0135717	0.0299476	0.042129	0.0397031	Ptprq	protein_coding	chr10:107517049-107720051:-	gi|124487427|ref|NP_001074901.1|
ENSMUSG00000035930	0.0624382	0.016402	0.216316	0.0108725	Chst4	protein_coding	chr8:110029153-110039740:-	gi|158749651|ref|NP_036128.3|
ENSMUSG00000036131	0.0285082	0	0	0	Frmd7	protein_coding	chrX:50895180-50942710:-	gi|298358799|ref|NP_001177261.1|
ENSMUSG00000036168	0.0661947	0.020287	0.171998	0	Ccdc38	protein_coding	chr10:93540632-93584327:+	gi|31541988|ref|NP_780697.2|
ENSMUSG00000036412	0.0444728	0	0	0.00416994	Arsi	protein_coding	chr18:60911780-60918561:+	gi|84370328|ref|NP_001033588.1|
ENSMUSG00000036564	0.0728	0.017849	0.0161417	0.0304244	Ndrg4	protein_coding	chr8:95676980-95715119:+	gi|37360274|dbj|BAC98115.1|
ENSMUSG00000036764	7.49892	2.2606	2.07556	15.4377	Dnajc12	protein_coding	chr10:63382443-63410576:+	gi|13994138|ref|NP_038916.1|
ENSMUSG00000036832	0.0247827	0	0.00400677	0	Lpar3	protein_coding	chr3:146220963-146286186:+	gi|12667796|ref|NP_075359.1|
ENSMUSG00000036951	0.0218948	0	0	0	C130079G13Rik	protein_coding	chr3:59925214-59937949:+	gi|148703421|gb|EDL35368.1|
ENSMUSG00000037161	0.201875	0	0	0.0480138	Mgarp	protein_coding	chr3:51388412-51396738:-	gi|148703257|gb|EDL35204.1|
ENSMUSG00000037347	0.15686	0.446801	0.389358	0.376778	Chst7	protein_coding	chrX:20059560-20097521:+	gi|11096336|ref|NP_068361.1|
ENSMUSG00000037466	0.0804915	0.0203153	0.0252616	0	4930427A07Rik	protein_coding	chr12:113156421-113166048:+	gi|167466268|ref|NP_598802.2|
ENSMUSG00000037490	0.0552469	0.0265019	0.0233011	0.0175675	Slc2a12	protein_coding	chr10:22645011-22704285:+	gi|226437623|ref|NP_849265.2|
ENSMUSG00000037610	0.0195219	0	0	0	Kcnmb2	protein_coding	chr3:31902507-32200180:+	gi|568921077|ref|XP_006535611.1|
ENSMUSG00000037627	0.024055	0	0.00424266	0	Rgs22	protein_coding	chr15:36009479-36140400:-	gi|307691211|ref|NP_001182677.1|
ENSMUSG00000037852	0.429098	0.148245	0.151363	0.109363	Cpe	protein_coding	chr8:64592542-64693054:-	gi|22203763|ref|NP_038522.2|
ENSMUSG00000037994	0.0148116	0.133912	0.0502883	0.0609333	Slc9b2	protein_coding	chr3:135307700-135345387:+	gi|254826800|ref|NP_849208.4|
ENSMUSG00000037995	0.0246278	0.0773648	0.0627121	0.165107	Igsf9	protein_coding	chr1:172481788-172498878:+	gi|148707064|gb|EDL39011.1|
ENSMUSG00000038011	0.000632689	0.0170634	0.0147298	0.015424	Dnah10	protein_coding	chr5:124725085-124834308:+	gi|254692843|ref|NP_062409.1|
ENSMUSG00000038026	0.0688306	0.0203674	0.0253264	0.00289309	Kcnj9	protein_coding	chr1:172320501-172329318:-	gi|111607443|ref|NP_032455.2|
ENSMUSG00000038092	13.5743	79.7802	0.00637358	52.4493	Hsd3b5	protein_coding	chr3:98618634-98630252:-	gi|113680667|ref|NP_032321.2|
ENSMUSG00000038199	0.0301643	0.00739566	0	0	4931409K22Rik	protein_coding	chr5:24543432-24556809:-	gi|282721066|ref|NP_808344.3|
ENSMUSG00000038357	2.09456	0.0329195	0.130246	0.163662	Camp	protein_coding	chr9:109847379-109849617:-	gi|1177534|emb|CAA64078.1|
ENSMUSG00000038486	0.0439061	0	0.014907	0.00535184	Sv2a	protein_coding	chr3:96181151-96195521:+	gi|291398069|ref|XP_002715673.1|
ENSMUSG00000038523	0.208554	0	0.0809236	0.0127106	1700003F12Rik	protein_coding	chr2:154547085-154550003:+	gi|148674137|gb|EDL06084.1|
ENSMUSG00000038656	12.9601	0.129813	0.0513607	0.0215125	Cyp3a16	protein_coding	chr5:145436309-145469723:-	gi|148687033|gb|EDL18980.1|
ENSMUSG00000038663	0.00510787	0.0845333	0.0842336	0.0435829	Fsd2	protein_coding	chr7:81533308-81566944:-	gi|116063550|ref|NP_766492.2|
ENSMUSG00000038754	7.13238	22.0635	0.317194	19.0816	Elovl3	protein_coding	chr19:46131897-46135307:+	gi|6671752|ref|NP_031729.1|
ENSMUSG00000038801	0.022368	0.438733	0.455662	0.599829	Scgb1c1	protein_coding	chr7:140845547-140846769:+	gi|153791540|ref|NP_001093212.1|
ENSMUSG00000039037	0.0237394	0.00831488	0	0	St6galnac5	protein_coding	chr3:152817081-152982246:-	gi|148540137|ref|NP_036158.3|
ENSMUSG00000039146	0.621297	0	0	0.0180313	Ifi44l	protein_coding	chr3:151758737-151762892:-	gi|148679995|gb|EDL11942.1|
ENSMUSG00000039154	0.0722736	0	0.00637358	0	Shd	protein_coding	chr17:55970467-55976617:+	gi|226958481|ref|NP_001152995.1|
ENSMUSG00000039315	0.112491	0.00725799	0.0402029	0	Clnk	protein_coding	chr5:38706462-38876812:-	gi|148540056|ref|NP_038776.3|
ENSMUSG00000039542	0.0787036	0.0316808	0.0284876	0.0157504	Ncam1	protein_coding	chr9:49502136-49798925:-	gi|568958952|ref|XP_006510125.1|
ENSMUSG00000039699	0.0564965	0.326506	0.15267	0.290217	Batf2	protein_coding	chr19:6140983-6172476:+	gi|28077033|ref|NP_083243.1|
ENSMUSG00000039878	0.736435	0.274763	0.248481	0.0223021	Slc39a5	protein_coding	chr10:128395931-128401229:-	gi|148692617|gb|EDL24564.1|
ENSMUSG00000039913	0.0156456	0	0	0	Pak7	protein_coding	chr2:136081104-136387967:-	gi|568917008|ref|XP_006499571.1|
ENSMUSG00000039963	0.00675008	0.0330996	0.0327398	0.0390824	Ccdc40	protein_coding	chr11:119228572-119265236:+	gi|568972640|ref|XP_006532761.1|
ENSMUSG00000040017	131.602	61.8343	46.9966	263.509	Saa4	protein_coding	chr7:46727998-46732603:-	gi|6755398|ref|NP_035446.1|
ENSMUSG00000040037	0.0154996	0.00475023	0	0	Negr1	protein_coding	chr3:156561794-157316445:+	gi|84875493|ref|NP_001034183.1|
ENSMUSG00000040170	9.898	3.9527	22.2852	2.34885	Fmo2	protein_coding	chr1:162874317-162898726:-	gi|31542819|ref|NP_061369.2|
ENSMUSG00000040204	0.0317186	0	0.0635888	0	Pclaf	protein_coding	chr9:65890237-65903266:+	gi|148694161|gb|EDL26108.1|
ENSMUSG00000040229	0.0925221	0.0119392	0.0141713	0.0237427	Gpr34	protein_coding	chrX:13632089-13640858:+	gi|154091030|ref|NP_035953.3|
ENSMUSG00000040314	0.619584	0	0	0	Ctsg	protein_coding	chr14:56099881-56102574:-	gi|6681083|ref|NP_031826.1|
ENSMUSG00000040554	0.0257901	0	0	0	Aipl1	protein_coding	chr11:72027963-72037509:-	gi|568971177|ref|XP_006532060.1|
ENSMUSG00000040583	58.1661	0.239548	19.2609	0	Cyp2b13	protein_coding	chr7:26061497-26096197:+	gi|160948606|ref|NP_031839.2|
ENSMUSG00000040660	114.116	11.6053	312.247	1.73916	Cyp2b9	protein_coding	chr7:26173411-26210661:+	gi|6753578|ref|NP_034130.1|
ENSMUSG00000040728	0.0451972	0.0118729	0.0187902	0.013773	Esrp1	protein_coding	chr4:11331933-11386783:-	gi|568926275|ref|XP_006537778.1|
ENSMUSG00000040838	0.013072	0.00209021	0.00496198	0.00554222	Gm11639	protein_coding	chr11:104685707-105117394:+	gi|755539710|ref|XP_011247563.1|
ENSMUSG00000040985	0.156696	0.00960468	0.0684019	0	Sun3	protein_coding	chr11:9016054-9048991:-	gi|594542535|ref|NP_001277448.1|
ENSMUSG00000041078	0.0801636	0.0225207	0.00810033	0.0244284	Grid1	protein_coding	chr14:34819825-35583379:+	gi|153792501|ref|NP_032192.2|
ENSMUSG00000041202	0.0272245	0	0	0	Pla2g2d	protein_coding	chr4:138775735-138782046:+	gi|7242177|ref|NP_035239.1|
ENSMUSG00000041468	0.202576	0.079468	0.019651	0.0592622	Gpr12	protein_coding	chr5:146582398-146585239:-	gi|6680061|ref|NP_032177.1|
ENSMUSG00000041479	0.0236455	0.0893765	0.0496979	0.0600463	Syt15	protein_coding	chr14:34219595-34230421:+	gi|31542579|ref|NP_852682.1|
ENSMUSG00000041536	0.04914	0	0.0052965	0	Serpina3a	protein_coding	chr12:104112724-104121896:+	gi|755543143|ref|XP_011242492.1|
ENSMUSG00000041550	0.00941483	0.352019	0.050231	0.068856	Serpina5	protein_coding	chr12:104101113-104106137:+	gi|269973919|ref|NP_766541.2|
ENSMUSG00000041567	3.16907	10.5289	0.104345	8.30399	Serpina12	protein_coding	chr12:104028769-104044443:-	gi|13386038|ref|NP_080811.1|
ENSMUSG00000041605	0.00817957	0.0250683	0.0277712	0.0373887	5730559C18Rik	protein_coding	chr1:136213531-136234264:-	gi|340745321|ref|NP_083148.3|
ENSMUSG00000041649	0.0195494	0	0	0	Klf8	protein_coding	chrX:153237466-153396132:+	gi|569012000|ref|XP_006528915.1|
ENSMUSG00000041698	22.4826	55.6807	0.069236	50.3676	Slco1a1	protein_coding	chr6:141907282-141946962:-	gi|7305497|ref|NP_038825.1|
ENSMUSG00000041735	0.0497674	0	0	0	Gm13178	protein_coding	chr4:144703191-144721404:-	gi|148222101|ref|NP_001079005.1|
ENSMUSG00000041986	0.0183625	0	0	0	Elmod1	protein_coding	chr9:53911457-53975301:-	gi|74205490|dbj|BAE21051.1|
ENSMUSG00000042388	0.0337672	0	0	0.00548797	Dlgap3	protein_coding	chr4:127169204-127237022:+	gi|443906724|ref|NP_775161.2|
ENSMUSG00000042589	1.68783	0.198	5.00978	0.268242	Cux2	protein_coding	chr5:121856366-122050102:-	gi|568936848|ref|XP_006530220.1|
ENSMUSG00000042638	1.47045	0.103997	0.221942	0.35722	Gucy2c	protein_coding	chr6:136697284-136781765:-	gi|187960051|ref|NP_001120790.1|
ENSMUSG00000042671	0.00739025	0.0232963	0.0194586	0.0205901	Rgs8	protein_coding	chr1:153653025-153700323:+	gi|562825369|ref|XP_006142398.1|
ENSMUSG00000042763	0.0298568	0.00457517	0.00724069	0	Maneal	protein_coding	chr4:124855239-124862171:-	gi|56090560|ref|NP_001007574.1|
ENSMUSG00000043385	0.0603107	0	0.00975079	0.0153155	Olfr267	protein_coding	chr4:58782704-58787716:-	gi|260274031|ref|NP_667131.2|
ENSMUSG00000043458	0.0100634	0.0657956	0.0715883	0.0367996	Pcdhb12	protein_coding	chr18:37435621-37438654:+	gi|18087787|ref|NP_444367.1|
ENSMUSG00000043614	0.0856908	0.452515	0.191827	0.25711	Vps37d	protein_coding	chr5:135072900-135078266:-	gi|189491873|ref|NP_001121665.1|
ENSMUSG00000043807	0.0519257	0.339496	0.00839513	0.210979	Ly6g5b	protein_coding	chr17:35113948-35115428:-	gi|22507343|ref|NP_683741.1|
ENSMUSG00000043924	0.447862	0.162469	0.155161	0.144834	Ncmap	protein_coding	chr4:135369576-135398227:-	gi|148698035|gb|EDL29982.1|
ENSMUSG00000044716	0.038091	0.00583695	0.0138564	0	Dok7	protein_coding	chr5:35056766-35087839:+	gi|568934110|ref|XP_006503962.1|
ENSMUSG00000044966	0.104175	0.0388675	0	0.0386466	Fbxo48	protein_coding	chr11:16951375-16954772:+	gi|28892819|ref|NP_795956.1|
ENSMUSG00000045102	0.0769454	0.00230066	0.0200257	0.00228758	Poln	protein_coding	chr5:34007179-34169448:-	gi|46309579|ref|NP_862905.1|
ENSMUSG00000045231	0.0493093	0.117874	0.0191331	0.114198	BC106179	protein_coding	chr16:23220656-23225368:-	gi|26334793|dbj|BAC31097.1|
ENSMUSG00000045498	0.0268747	0.00329456	0	0.00327583	Pcdhb3	protein_coding	chr18:37300799-37304585:+	gi|113866017|ref|NP_444358.2|
ENSMUSG00000045569	0.14986	0	0	0	Mc2r	protein_coding	chr18:68406907-68429251:-	gi|6678820|ref|NP_032586.1|
ENSMUSG00000045678	0.00541353	0	0	0	Olfr1489	protein_coding	chr19:13631621-13643987:+	gi|33239130|ref|NP_666846.1|
ENSMUSG00000046101	0.0378471	0.0147626	0.00667524	0.00629085	Mcmdc2	protein_coding	chr1:9908638-9942085:+	gi|183227685|ref|NP_808390.2|
ENSMUSG00000046167	0.0262192	0.0883907	0.154724	0.0692453	Gldn	protein_coding	chr9:54286486-54341786:+	gi|28893493|ref|NP_796324.1|
ENSMUSG00000046323	0.171145	0.0279742	0.0664081	0	Dppa3	protein_coding	chr6:122626410-122630272:+	gi|21218416|ref|NP_631964.1|
ENSMUSG00000046589	0.00984754	0.114685	0.042987	0.0840241	Lrrc8e	protein_coding	chr8:4226827-4237470:+	gi|251823957|ref|NP_082451.2|
ENSMUSG00000046637	0.0555245	0	0.00797953	0.00250668	Ttc34	protein_coding	chr4:154837459-154867127:+	gi|568931236|ref|XP_006538925.1|
ENSMUSG00000047013	0.0121885	0	0	0	Fbxo41	protein_coding	chr6:85469574-85502994:-	gi|47564092|ref|NP_001001160.1|
ENSMUSG00000047115	0.11216	0.0192496	0.0456968	0.00820293	Fam221a	protein_coding	chr6:49367739-49390539:+	gi|148666193|gb|EDK98609.1|
ENSMUSG00000047129	0.111623	0.00804934	0.0254779	0.00800359	1700113H08Rik	protein_coding	chr10:87058045-87230589:+	gi|258613935|ref|NP_083961.1|
ENSMUSG00000047161	0	0.0645113	0.0357336	0.070559	Chst9	protein_coding	chr18:15451924-15760157:-	gi|148669658|gb|EDL01605.1|
ENSMUSG00000048251	0.08156	0.0199968	0.0158235	0.0244716	Bcl11b	protein_coding	chr12:107910403-108003602:-	gi|120587007|ref|NP_001073352.1|
ENSMUSG00000048442	0.1975	0	0	0.0601847	Smim5	protein_coding	chr11:115899966-115906269:+	gi|148702585|gb|EDL34532.1|
ENSMUSG00000048480	0.191126	0.0167357	0.0860797	0.0915233	Cxcr1	protein_coding	chr1:74191785-74194631:-	gi|30142679|ref|NP_839972.1|
ENSMUSG00000048644	0.0587806	0.154412	0.195499	0.603901	Ctxn1	protein_coding	chr8:4257660-4259274:-	gi|148690044|gb|EDL21991.1|
ENSMUSG00000049148	0.0565189	0.0222706	0.0137066	0.00984178	Plcxd3	protein_coding	chr15:4375491-4575553:+	gi|537231884|gb|ERE84286.1|
ENSMUSG00000049252	0.000428091	0.00419836	0.00498326	0.00313087	Lrp1b	protein_coding	chr2:40595246-42653624:-	gi|568914579|ref|XP_006498522.1|
ENSMUSG00000049357	0.117078	0.0102518	0.0365054	0.265033	4933408B17Rik	protein_coding	chr18:34579846-34597468:-	gi|283484014|ref|NP_808441.2|
ENSMUSG00000049526	0.00597267	0.0878626	0.139052	0.0728026	Tmem202	protein_coding	chr9:59518685-59539847:-	gi|30409994|ref|NP_848475.1|
ENSMUSG00000049538	0.014888	0.0657041	0.00288844	0.0326653	Adamts16	protein_coding	chr13:70727802-70841811:-	gi|50511261|dbj|BAD32616.1|
ENSMUSG00000049551	0.0754542	0.00544112	0	0	Fzd9	protein_coding	chr5:135248938-135251230:-	gi|169234612|ref|NP_034376.1|
ENSMUSG00000049985	1.2889	0.0837114	0.264964	0.235834	Ankrd55	protein_coding	chr13:112288451-112384002:+	gi|270288786|ref|NP_084174.2|
ENSMUSG00000050315	0.0464794	0.113958	0.0991927	0.103868	Synpo2	protein_coding	chr3:123076519-123236149:-	gi|226958463|ref|NP_536699.2|
ENSMUSG00000050423	3.19181	0.0099059	0.125417	0.0295488	Ppp1r3g	protein_coding	chr13:35958839-35970388:+	gi|223278390|ref|NP_083904.1|
ENSMUSG00000050737	0.116506	0.831554	0.276264	0.347141	Ptges	protein_coding	chr2:30889471-30929863:-	gi|11967941|ref|NP_071860.1|
ENSMUSG00000050921	0.163822	0.0794947	0.0794582	0.0790428	P2ry10	protein_coding	chrX:107088492-107104974:+	gi|27369579|ref|NP_766023.1|
ENSMUSG00000050944	0.0827754	0.00724815	0.0401484	0.0360347	Efcab5	protein_coding	chr11:77089915-77188968:-	gi|568974380|ref|XP_006533586.1|
ENSMUSG00000051054	0.0247852	0	0	0	1700014D04Rik	protein_coding	chr13:59740842-59746752:-	gi|568899720|ref|XP_006543138.1|
ENSMUSG00000051156	0.0353179	0	0.00571005	0	Olfr1491	protein_coding	chr19:13697268-13706127:+	gi|148709569|gb|EDL41515.1|
ENSMUSG00000051257	0.129594	0	0	0	Trap1a	protein_coding	chrX:139333683-139338169:+	gi|6755871|ref|NP_035765.1|
ENSMUSG00000051379	0.0146438	0.0564199	0.0547918	0.0458993	Flrt3	protein_coding	chr2:140650914-140671469:-	gi|37360402|dbj|BAC98179.1|
ENSMUSG00000051517	0.0190232	0.116603	0.0516701	0.0834767	Arhgef39	protein_coding	chr4:43496142-43499695:-	gi|225543124|ref|NP_001013395.2|
ENSMUSG00000051839	0.275363	0.00675134	0.0373965	0.0537037	Gypa	protein_coding	chr8:80493781-80510542:+	gi|111185918|ref|NP_034499.3|
ENSMUSG00000051906	0.27133	0	0	0	Cd209f	protein_coding	chr8:4102787-4105835:-	gi|28374182|gb|AAH46292.1|
ENSMUSG00000051920	0.0183708	0	0.00297012	0	Rspo2	protein_coding	chr15:43020811-43170818:-	gi|27370216|ref|NP_766403.1|
ENSMUSG00000051985	0	0.0166427	0.00987707	0.00827405	Igfn1	protein_coding	chr1:135953578-136006342:-	gi|310923113|ref|NP_808310.2|
ENSMUSG00000052131	2.43909	0.876568	6.41994	0.33895	Akr1b7	protein_coding	chr6:34412334-34423142:+	gi|160415215|ref|NP_033861.2|
ENSMUSG00000052212	0.354777	0.0483244	0.0730022	0.0480497	Cd177	protein_coding	chr7:24743983-24760311:-	gi|34328436|ref|NP_081138.2|
ENSMUSG00000052336	0.463124	0.21325	0.111766	0.187254	Cx3cr1	protein_coding	chr9:119901616-120069879:-	gi|87299632|ref|NP_034117.3|
ENSMUSG00000052387	0.00126255	0.0464328	0.0342929	0.0200065	Trpm3	protein_coding	chr19:22139119-22989884:+	gi|78214526|ref|NP_001030316.1|
ENSMUSG00000052396	0.34387	1.17626	1.66248	0.845066	Mogat2	protein_coding	chr7:99219084-99238619:-	gi|28974982|ref|NP_803231.1|
ENSMUSG00000052673	0	0.359899	0.142394	0.0994035	Gm9887	protein_coding	chr12:69371835-69372458:-	gi|12853280|dbj|BAB29703.1|
ENSMUSG00000052981	0.117988	0.0093317	0.0036921	0.027836	Ube2ql1	protein_coding	chr13:69702832-69739889:-	gi|223555981|ref|NP_001138634.1|
ENSMUSG00000053121	0.814195	0	0.0658178	0	Gm5129	protein_coding	chr5:29735637-29735936:-	gi|26345606|dbj|BAC36454.1|
ENSMUSG00000053398	0.184225	0.0451683	0.0794262	0.0548919	Phgdh	protein_coding	chr3:98313170-98339990:-	gi|52353955|ref|NP_058662.2|
ENSMUSG00000053475	0.0773723	0	0.167431	0.181368	Tnfaip6	protein_coding	chr2:52038009-52056686:+	gi|6678379|ref|NP_033424.1|
ENSMUSG00000054417	94.8701	0.426057	1.68067	0.15175	Cyp3a44	protein_coding	chr5:145773983-145805874:-	gi|28893549|ref|NP_796354.1|
ENSMUSG00000054905	0.148215	0	0	0	Stfa3	protein_coding	chr16:36450537-36455392:-	gi|146386396|gb|ABQ23986.1|
ENSMUSG00000054978	0.119976	0.050427	0.00332525	0	Kbtbd13	protein_coding	chr9:65388684-65391652:-	gi|157384988|ref|NP_083250.1|
ENSMUSG00000054988	0.0426627	0	0	0	Agtr1b	protein_coding	chr3:20314473-20367177:-	gi|157012005|ref|NP_780295.2|
ENSMUSG00000055333	0.00420324	0	0.000679562	0	Fat2	protein_coding	chr11:55250609-55336564:-	gi|71725377|ref|NP_001025159.1|
ENSMUSG00000055373	0	0.00902523	0.00785586	0.00538436	Fut9	protein_coding	chr4:25609332-25800244:-	gi|817348667|ref|XP_012299710.1|
ENSMUSG00000055421	0.0585169	0.231761	0.251802	0.124367	Pcdh9	protein_coding	chr14:93013410-93890679:-	gi|124487029|ref|NP_001074846.1|
ENSMUSG00000055515	0.0248533	0	0	0	Vmn2r81	protein_coding	chr10:79247777-79294535:+	gi|35215313|ref|NP_787950.1|
ENSMUSG00000055761	0.0146607	0	0	0	Nkain3	protein_coding	chr4:20118874-20778866:-	gi|594150404|ref|NP_001277339.1|
ENSMUSG00000055782	6.37494	0.555313	3.17776	0.480331	Abcd2	protein_coding	chr15:91145884-91191807:-	gi|60218875|ref|NP_036124.2|
ENSMUSG00000056054	20.0322	5.627	4.7514	8.70534	S100a8	protein_coding	chr3:90668978-90670035:+	gi|7305453|ref|NP_038678.1|
ENSMUSG00000056148	4.16453	0.966145	1.40253	1.33731	Rdh9	protein_coding	chr10:127776386-127792697:+	gi|23680945|ref|NP_694773.1|
ENSMUSG00000056399	0.0753264	0	0	0	Prss34	protein_coding	chr17:25298394-25300161:+	gi|148690469|gb|EDL22416.1|
ENSMUSG00000056426	0.102139	0	0	0	Nat3	protein_coding	chr8:67523854-67548627:+	gi|755525838|ref|XP_011240577.1|
ENSMUSG00000056458	0.0567904	0.00366417	0.00869839	0.00364334	Mok	protein_coding	chr12:110807798-110840939:-	gi|7106391|ref|NP_036103.1|
ENSMUSG00000056481	0.306118	0.131588	0.123408	0.125994	Cd248	protein_coding	chr19:5068078-5070637:+	gi|16923944|ref|NP_473383.1|
ENSMUSG00000056978	350.467	8.9668	109.785	6.66028	Hamp2	protein_coding	chr7:30922372-30924681:-	gi|34304034|ref|NP_899080.1|
ENSMUSG00000057060	0.0264463	0	0	0	Slc35f3	protein_coding	chr8:126298558-126395482:+	gi|148679862|gb|EDL11809.1|
ENSMUSG00000057697	0.11792	0.322476	0.0439959	0.0110567	Vmn1r53	protein_coding	chr6:90223317-90224438:-	gi|282721134|ref|NP_444456.2|
ENSMUSG00000057913	0.0332234	0.108609	0.161143	0.121491	Gm10032	protein_coding	chr14:66784529-66793758:+	gi|26333939|dbj|BAC30687.1|
ENSMUSG00000058672	20.8859	56.1209	7.78163	52.0571	Tubb2a	protein_coding	chr13:34074274-34078007:-	gi|586480181|ref|XP_006870616.1|
ENSMUSG00000058743	0.0412042	0	0.00726734	0.00913181	Kcnj14	protein_coding	chr7:45816460-45824782:-	gi|22122399|ref|NP_666075.1|
ENSMUSG00000058794	0.034061	0.0918617	0.12886	0.269867	Nfe2	protein_coding	chr15:103248212-103258403:-	gi|148671981|gb|EDL03928.1|
ENSMUSG00000059031	0.105203	0.023883	0.0188987	0.0094989	Olfr482	protein_coding	chr7:108092999-108097586:-	gi|22129375|ref|NP_666944.1|
ENSMUSG00000059060	0.493025	0.0630964	0.157669	0.188213	Rad51b	protein_coding	chr12:79297282-79814690:+	gi|568979145|ref|XP_006515688.1|
ENSMUSG00000059743	0.217673	0.0889483	0.0868082	0.890323	Fdps	protein_coding	chr3:89093588-89101959:-	gi|359279938|ref|NP_001240680.1|
ENSMUSG00000059873	0.0108646	0.0432864	0.0632357	0.0728376	Olfr1029	protein_coding	chr2:85973895-85978913:+	gi|282847367|ref|NP_001011852.2|
ENSMUSG00000060240	0.097474	0.007029	0.216921	0.0279562	Cend1	protein_coding	chr7:141426446-141429491:-	gi|148686123|gb|EDL18070.1|
ENSMUSG00000060445	0.0341124	0	0.0132364	0.0103951	Sycp2	protein_coding	chr2:178345293-178407685:-	gi|109689713|ref|NP_796165.2|
ENSMUSG00000061080	0.00650391	0.0188456	0.0229424	0.0180177	Lsamp	protein_coding	chr16:39984361-42181679:+	gi|30425330|ref|NP_780757.1|
ENSMUSG00000061356	0.0610072	0.0175973	0.0034812	0.122481	Nuggc	protein_coding	chr14:65598546-65648531:+	gi|345842386|ref|NP_001182603.2|
ENSMUSG00000061780	2.03107	0.108256	0.214158	0	Cfd	protein_coding	chr10:79890853-79892655:+	gi|7304867|ref|NP_038487.1|
ENSMUSG00000062345	0.0606573	0.0053114	0.00840585	0	Serpinb2	protein_coding	chr1:107511423-107535478:+	gi|755493923|ref|XP_011246244.1|
ENSMUSG00000062393	0.0170619	0	0.00137925	0	Dgkk	protein_coding	chrX:6779306-6948363:+	gi|189491687|ref|NP_808582.3|
ENSMUSG00000062727	0.598673	0.157267	0.0829637	0.156373	Hist1h2bk	protein_coding	chr13:22035870-22036345:+	gi|30089704|ref|NP_783596.1|
ENSMUSG00000063415	0.583795	17.0852	29.1495	2.0815	Cyp26b1	protein_coding	chr6:84571414-84593908:-	gi|148666702|gb|EDK99118.1|
ENSMUSG00000063446	0.0937948	0.00686464	0.014938	0.00341281	Plppr1	protein_coding	chr4:49059273-49340259:+	gi|60360644|dbj|BAD90332.1|
ENSMUSG00000063531	0.0263068	0.0053749	0.0116962	0.00133609	Sema3e	protein_coding	chr5:14025276-14256689:+	gi|113199777|ref|NP_035478.2|
ENSMUSG00000063590	1.05126	2.64596	0.221692	2.55664	Slc22a28	protein_coding	chr19:8062209-8131982:-	gi|268837834|ref|NP_001013842.2|
ENSMUSG00000064023	0.0330436	0.137727	0.15386	0.161111	Klk8	protein_coding	chr7:43797577-43803826:+	gi|148690734|gb|EDL22681.1|
ENSMUSG00000064109	0.493366	0.0172804	0.218785	0.0859111	Hcst	protein_coding	chr7:30417712-30419854:-	gi|93102419|ref|NP_035957.2|
ENSMUSG00000064125	0.0104042	0.0459163	0.0666118	0.0329733	Prr36	protein_coding	chr8:4209543-4217459:-	gi|45768361|gb|AAH68157.1|
ENSMUSG00000064357	333.913	116.447	104.714	67.0921	mt-Atp6	protein_coding	chrMT:7927-8607:+	gi|733386904|ref|YP_009112413.1|
ENSMUSG00000066071	18.0269	62.233	0.648124	62.7193	Cyp4a12a	protein_coding	chr4:115299046-115332815:+	gi|86198312|ref|NP_803125.2|
ENSMUSG00000066107	0.226461	0	0	0	Gm12666	protein_coding	chr4:92190744-92191749:-	gi|148698996|gb|EDL30943.1|
ENSMUSG00000066153	70.4904	177.73	6.19777	237.575	Mup21	protein_coding	chr4:62147932-62150863:-	gi|57222278|ref|NP_001009550.1|
ENSMUSG00000066361	2.30866	0.169134	0.11153	0.0840865	Serpina3c	protein_coding	chr12:104146382-104153870:-	gi|755542214|ref|XP_011242304.1|
ENSMUSG00000066583	0.0810144	0	0	0	Scgb1b27	protein_coding	chr7:34021483-34022881:+	gi|39930319|ref|NP_033726.1|
ENSMUSG00000066607	0.00436612	0.107048	0.0423538	0.0691859	6030419C18Rik	protein_coding	chr9:58488603-58499780:+	gi|28892717|ref|NP_795895.1|
ENSMUSG00000067144	3.98071	10.8726	1.65282	8.02931	Slc22a7	protein_coding	chr17:46432185-46438477:-	gi|254939683|ref|NP_659105.2|
ENSMUSG00000067206	0.0188587	0	0	0	Lrrc66	protein_coding	chr5:73606642-73632526:-	gi|23956358|ref|NP_705796.1|
ENSMUSG00000067341	0.0276436	0	0.0715087	0	H2-Eb2	protein_coding	chr17:34325665-34340229:+	gi|85702171|ref|NP_001029150.1|
ENSMUSG00000067656	5.22587	0.0579762	2.03693	0.126823	Slc22a27	protein_coding	chr19:7864388-7966027:-	gi|569006501|ref|XP_006526790.1|
ENSMUSG00000067872	0.00321765	0.0276116	0.0530621	0.101974	Ccdc87	protein_coding	chr19:4839366-4842528:+	gi|148536851|ref|NP_997151.2|
ENSMUSG00000068037	0.0427297	0	0.0113046	0.104169	Mas1	protein_coding	chr17:12841079-12868143:-	gi|31543241|ref|NP_032578.2|
ENSMUSG00000068129	0.123863	0	0	0	Cst7	protein_coding	chr2:150570415-150578944:+	gi|3986155|dbj|BAA34940.1|
ENSMUSG00000068246	33.3846	153.287	71.0321	72.8997	Apol9b	protein_coding	chr15:77729121-77736381:+	gi|148697699|gb|EDL29646.1|
ENSMUSG00000068373	0.0109152	0	0	0	D430041D05Rik	protein_coding	chr2:104143073-104410334:-	gi|123123374|emb|CAM16661.1|
ENSMUSG00000068614	0.157253	0.0616884	0	0.069005	Actc1	protein_coding	chr2:114047282-114053548:-	gi|726987387|ref|XP_010390022.1|
ENSMUSG00000068697	0.0629208	0	0	0	Myoz1	protein_coding	chr14:20649102-20656540:-	gi|157819165|ref|NP_001102567.1|
ENSMUSG00000068748	0	0.00788265	0.0145543	0.00522523	Ptprz1	protein_coding	chr6:22875502-23052916:+	gi|124486807|ref|NP_001074775.1|
ENSMUSG00000068877	16.2902	129.094	1.57806	122.876	Selenbp2	protein_coding	chr3:94693556-94704413:+	gi|9507079|ref|NP_062287.1|
ENSMUSG00000069117	43.4149	1.98428	3.18335	1.91894	Gm10260	protein_coding	chr13:97760130-97760588:-	gi|148668546|gb|EDL00865.1|
ENSMUSG00000069310	5.36969	1.58189	2.46312	2.28323	Hist1h3c	protein_coding	chr13:23745013-23745501:-	gi|242003156|ref|XP_002422632.1|
ENSMUSG00000069670	0.0993974	0.0291383	0.03773	0.0368743	Nkain2	protein_coding	chr10:31689310-32890462:-	gi|755533138|ref|XP_011241491.1|
ENSMUSG00000070348	7.75032	21.2251	23.8714	17.5322	Ccnd1	protein_coding	chr7:144929931-144939925:-	gi|186461217|gb|ACC78286.1|
ENSMUSG00000070368	0.982887	4.96596	0.423419	2.03633	Prok1	protein_coding	chr3:107232797-107239707:-	gi|117676357|ref|NP_001037847.1|
ENSMUSG00000070498	0	0.018174	0.0311592	0.0180707	Tmem132b	protein_coding	chr5:125531774-125792583:+	gi|298493223|ref|NP_001177281.1|
ENSMUSG00000070570	0.0151001	0	0	0	Slc17a7	protein_coding	chr7:45163949-45176142:+	gi|160966287|gb|ABX55782.1|
ENSMUSG00000070720	0.468013	2.39512	2.20514	1.28583	Tmem200b	protein_coding	chr4:131921771-131923140:+	gi|318067976|ref|NP_001188296.1|
ENSMUSG00000070810	5.43007	0	0.0305656	0	Sult2a6	protein_coding	chr7:14222403-14254870:-	gi|124486757|ref|NP_001074794.1|
ENSMUSG00000070811	95.6899	0.0505121	0.612879	0.0167416	Sult2a2	protein_coding	chr7:13733505-13779636:+	gi|296923707|ref|NP_033312.2|
ENSMUSG00000070980	0.0424354	0	0	0	Actl7b	protein_coding	chr4:56740005-56741443:-	gi|146198843|ref|NP_079547.2|
ENSMUSG00000071356	0.356478	0	0	0.162945	Reg3b	protein_coding	chr6:78370657-78373466:+	gi|6754980|ref|NP_035166.1|
ENSMUSG00000071552	0.13739	0	0	0.0257644	Tigit	protein_coding	chr16:43648861-43664184:-	gi|226423924|ref|NP_001139797.1|
ENSMUSG00000071716	0.0411302	0.0952403	0.168461	0.155975	Apol7e	protein_coding	chr15:77698889-77719288:+	gi|198278477|ref|NP_001128274.1|
ENSMUSG00000071745	0.0248924	0.20053	0.0827897	0.0606841	DXBay18	protein_coding	chrX:73137232-73149450:-	gi|85701574|ref|NP_001020554.1|
ENSMUSG00000072662	0.0477814	0.165963	0.200853	0.213554	Mansc4	protein_coding	chr6:147075060-147087032:-	gi|85702266|ref|NP_001030075.1|
ENSMUSG00000072849	645.855	1336.84	13.5299	2533.62	Serpina1e	protein_coding	chr12:103946931-103958975:-	gi|74138950|dbj|BAE27272.1|
ENSMUSG00000072952	0.0174197	0	0	0	Gm5878	protein_coding	chr6:85111416-85126125:-	gi|589943913|ref|XP_006984654.1|
ENSMUSG00000073400	0.0408004	0	0.00439763	0.00552586	Trim10	protein_coding	chr17:36869574-36877833:+	gi|255069792|ref|NP_035410.2|
ENSMUSG00000073422	0.0066389	0.0895247	0.0708411	0.0485541	H2-Ke6	protein_coding	chr17:34026033-34028060:-	gi|157951743|ref|NP_038571.2|
ENSMUSG00000073733	0.0649969	0.179279	0.183898	0.151851	Rsg1	protein_coding	chr4:141213956-141226756:+	gi|124487179|ref|NP_001074643.1|
ENSMUSG00000073830	0.913171	3.7917	0.028575	3.46494	Mup14	protein_coding	chr4:61300023-61304000:-	gi|317008607|ref|NP_001186928.1|
ENSMUSG00000073834	12.8251	145.522	3.27628	35.1386	Mup11	protein_coding	chr4:60658466-60662411:-	gi|257153315|ref|NP_001157998.1|
ENSMUSG00000073842	632.4	3308.31	6.80479	2019.01	Mup7	protein_coding	chr4:60066469-60070475:-	gi|197927289|ref|NP_001128147.1|
ENSMUSG00000073915	0.0290576	0	0	0	Olfr676	protein_coding	chr7:105032698-105037750:+	gi|22128775|ref|NP_667306.1|
ENSMUSG00000074254	122.931	7.71704	51.3743	2.30552	Cyp2a4	protein_coding	chr7:26307169-26315088:+	gi|116268118|ref|NP_034127.2|
ENSMUSG00000074300	0.0540275	0.00827902	0.0131024	0	BC030870	protein_coding	chr8:65085613-65129563:-	gi|148696741|gb|EDL28688.1|
ENSMUSG00000074375	4.80879	0.0122559	0.261849	0	Sult2a3	protein_coding	chr7:14067446-14123044:-	gi|357197126|ref|NP_001095056.2|
ENSMUSG00000074377	0.144801	0	0.0100332	0	Sult2a4	protein_coding	chr7:13909676-13989607:-	gi|168823480|ref|NP_001095004.1|
ENSMUSG00000074417	0.0956526	0.023452	0.0231971	0.0291484	Gm14548	protein_coding	chr7:3884242-3898120:-	gi|262263322|ref|NP_001160144.1|
ENSMUSG00000074472	0.053636	0.180819	0.146334	0.363668	Zfp872	protein_coding	chr9:22188090-22202123:+	gi|85702145|ref|NP_001028985.1|
ENSMUSG00000074634	0.276028	0.698596	0.0719793	0.944255	Tmem267	protein_coding	chr13:119487941-119610458:+	gi|148686393|gb|EDL18340.1|
ENSMUSG00000074771	0.0084989	0	0	0	Ankef1	protein_coding	chr2:136501910-136562091:+	gi|28316764|ref|NP_783598.1|
ENSMUSG00000075044	1.58574	0.0329485	0.0999435	0.0600621	Slc22a29	protein_coding	chr19:8160165-8218900:-	gi|27370150|ref|NP_766364.1|
ENSMUSG00000075224	0.0274392	0	0	0	Lrrc55	protein_coding	chr2:85162334-85196699:-	gi|85701836|ref|NP_001028518.1|
ENSMUSG00000075551	8.47296	0.15747	0.426538	0.168619	Cyp3a41a	protein_coding	chr5:145694049-145720136:-	gi|157364978|ref|NP_001098629.1|
ENSMUSG00000075552	11.1981	0.0725377	0.325263	0.0120209	Cyp3a41b	protein_coding	chr5:145558664-145584730:-	gi|157364978|ref|NP_001098629.1|
ENSMUSG00000075604	2.6561	0.0315361	0.00311933	0	Cyp11b1	protein_coding	chr15:74834125-74841643:-	gi|269914148|ref|NP_001028401.2|
ENSMUSG00000078129	0.0881457	0.182866	0.0065774	0	Actl10	protein_coding	chr2:154551776-154553276:+	gi|284172505|ref|NP_001165111.1|
ENSMUSG00000078139	1.88314	0.460411	0.482345	0.32239	AK157302	protein_coding	chr13:21495223-21497146:+	gi|589938008|ref|XP_006981759.1|
ENSMUSG00000078179	0.0410712	0.191326	0.18327	0.130163	Rnf148	protein_coding	chr6:23653898-23655136:-	gi|26000653|gb|AAN75221.1|
ENSMUSG00000078486	0.00521786	0.0479742	0.0303697	0.063602	Perm1	protein_coding	chr4:156215868-156221307:+	gi|161377418|ref|NP_766005.2|
ENSMUSG00000078597	15.9737	49.4319	1.653	41.029	Cyp4a12b	protein_coding	chr4:115411624-115439034:+	gi|38511987|gb|AAH60945.1|
ENSMUSG00000078672	627.031	1568.39	40.9695	1488.88	Mup20	protein_coding	chr4:62050234-62054158:-	gi|59858561|ref|NP_001012323.1|
ENSMUSG00000078683	19.8794	52.0011	0.74793	40.1066	Mup1	protein_coding	chr4:60498012-60501960:-	gi|568925868|ref|XP_006537578.1|
ENSMUSG00000078798	192.992	0.342492	0.803365	0.0121623	Sult2a1	protein_coding	chr7:13796246-13837409:-	gi|162329581|ref|NP_001104766.1|
ENSMUSG00000078799	21.6879	0.0238556	0.122701	0	Sult2a5	protein_coding	chr7:13623967-13670807:+	gi|297139699|ref|NP_001171909.1|
ENSMUSG00000078864	0.397683	1.20387	0.803041	0.949708	Gm14322	protein_coding	chr2:177759288-177770472:+	gi|345199290|ref|NP_001230832.1|
ENSMUSG00000078972	0.0442497	0	0	0	Gm15557	protein_coding	chr2:155940728-155942750:+	gi|354478006|ref|XP_003501207.1|
ENSMUSG00000079038	0.0634108	0.260968	0.252639	0.129742	D130040H23Rik	protein_coding	chr8:69271080-69314207:+	gi|148696788|gb|EDL28735.1|
ENSMUSG00000079110	0.399155	0.196226	0.147412	0.118548	Capn3	protein_coding	chr2:120456019-120504913:+	gi|157951713|ref|NP_031627.2|
ENSMUSG00000079168	0.0253731	0	0	0	Cd209g	protein_coding	chr8:4134098-4137707:+	gi|568953502|ref|XP_006508948.1|
ENSMUSG00000079343	2.41246	0.328082	0.270738	0.372819	C1s2	protein_coding	chr6:124624625-124636085:-	gi|295444820|ref|NP_776289.2|
ENSMUSG00000079355	0.170254	0.0533381	0.00734028	0.0253645	Ackr4	protein_coding	chr9:104084157-104126933:-	gi|225703149|ref|NP_663746.2|
ENSMUSG00000079444	0.0673259	0.0137558	0.0145133	0.00455919	Gm21981	protein_coding	chr17:47686739-47694455:-	gi|594140660|ref|NP_001277266.1|
ENSMUSG00000079492	1.43877	0.0092831	0.00734574	0.0184607	Gm11127	protein_coding	chr17:36055816-36058371:-	gi|316983113|ref|NP_001186896.1|
ENSMUSG00000079494	1.82698	7.81995	0.891144	7.32255	Nat8f5	protein_coding	chr6:85817218-85820972:-	gi|254692917|ref|NP_075982.2|
ENSMUSG00000079534	0.0106719	0.213683	0.62114	0.0693775	Gm5640	protein_coding	chrX:74639119-74645635:-	gi|150010625|ref|NP_001092772.1|
ENSMUSG00000079554	0.0176355	0.0562101	0.04619	0.0494417	Aox2	protein_coding	chr1:58278326-58380259:+	gi|56606023|ref|NP_001008419.1|
ENSMUSG00000079597	0.417914	0.0602729	0.166929	0	Gm5483	protein_coding	chr16:36184212-36188111:+	gi|127140962|ref|NP_001076016.1|
ENSMUSG00000079598	0.0712705	0	0	0	Clec2l	protein_coding	chr6:38663069-38680864:+	gi|168229210|ref|NP_001094977.1|
ENSMUSG00000079625	0.0485796	0	0	0.187514	Tm4sf19	protein_coding	chr16:32400506-32408227:+	gi|568995515|ref|XP_006522280.1|
ENSMUSG00000085576	0.017741	0	0.0028683	0	Dpy19l2	protein_coding	chr9:24557047-24696293:-	gi|148693341|gb|EDL25288.1|
ENSMUSG00000085584	0.0173592	0.00304008	0	0	Rgag1	protein_coding	chrX:143099594-143104297:+	gi|590122005|ref|NP_001035524.2|
ENSMUSG00000086962	0.194917	0.0768046	0	0	Gm12248	protein_coding	chr11:58063552-58093134:-	gi|148675829|gb|EDL07776.1|
ENSMUSG00000089665	1.35007	0.445589	0.579264	0.253175	Fcor	protein_coding	chr8:3671188-3672362:-	gi|391359274|sp|P0DJI6.1|FCOR_MOUSE
ENSMUSG00000089789	0.0984078	0	0.0477305	0.0284097	Rdh1	protein_coding	chr10:127759721-127768297:+	gi|165377241|ref|NP_536684.2|
ENSMUSG00000089873	3.35111	0.570571	0.0401328	6.79532	Mup13	protein_coding	chr4:61224307-61228286:-	gi|197927287|ref|NP_001128146.1|
ENSMUSG00000090015	0.533104	0.00990197	0.0235064	0.0196914	Gm15446	protein_coding	chr5:109923400-109943936:+	gi|295293092|ref|NP_663538.2|
ENSMUSG00000090077	0	0.037906	0.0428502	0.0269218	Lime1	protein_coding	chr2:181380078-181383628:+	gi|12963783|ref|NP_076173.1|
ENSMUSG00000090291	0.0294004	0	0	0	Lrrc10b	protein_coding	chr19:10455371-10457447:-	gi|162287221|ref|NP_001104610.1|
ENSMUSG00000090298	0.339248	0	0.0636947	0	Sult3a2	protein_coding	chr10:33766424-33786704:-	gi|168229231|ref|NP_001094922.1|
ENSMUSG00000090693	0.0615571	0	0	0	Trim43a	protein_coding	chr9:88580891-88588819:+	gi|85702270|ref|NP_001030078.1|
ENSMUSG00000090799	0.45106	0.0623045	0.0123254	0	Klhl33	protein_coding	chr14:50891389-50893255:-	gi|262263393|ref|NP_001160123.1|
ENSMUSG00000091089	0.257657	0	0.0138856	0	A930018M24Rik	protein_coding	chr14:50895942-50897456:-	gi|219519232|gb|AAI44874.1|
ENSMUSG00000091110	0.0578263	0	0	0.00704861	Gm2832	protein_coding	chr14:41278805-41288815:+	gi|148669596|gb|EDL01543.1|
ENSMUSG00000091530	0.0771018	0.245749	0.224379	0.263148	Cldn20	protein_coding	chr17:3532554-3533213:+	gi|158186785|ref|NP_001095030.1|
ENSMUSG00000091648	0.0104545	0.102529	0.106485	0.369555	C2cd4d	protein_coding	chr3:94362438-94364566:+	gi|209870113|ref|NP_001129589.1|
ENSMUSG00000091712	0.0304844	0.0800801	0.122511	0.00530833	Sec14l5	protein_coding	chr16:5147109-5183934:+	gi|189181692|ref|NP_001121197.1|
ENSMUSG00000091923	0.0348741	0	0	0	Gm8267	protein_coding	chr14:44716838-44724987:-	gi|755548720|ref|XP_011243452.1|
ENSMUSG00000091996	0.0211677	0.0830382	0.209445	0.12901	BC049352	protein_coding	chr9:45182007-45250020:+	gi|148693695|gb|EDL25642.1|
ENSMUSG00000092074	0.123446	0.840733	0.505609	0.401258	Dynlt1a	protein_coding	chr17:6310547-6317474:-	gi|6678265|ref|NP_033368.1|
ENSMUSG00000092083	0.0134223	0	0.00260407	0	Kcnb2	protein_coding	chr1:15287254-15723750:+	gi|148664234|ref|NP_001091998.1|
ENSMUSG00000092243	0.219578	0.040377	0.0319504	0.026765	Gm7030	protein_coding	chr17:36109719-36129425:-	gi|569017021|ref|XP_006536912.1|
ENSMUSG00000092277	0.0758096	0.25557	0.239003	0.415829	Gm19684	protein_coding	chr17:36121678-36129692:+	gi|294661840|ref|NP_001030081.2|
ENSMUSG00000093803	0.078495	0.0357414	0.0304578	0.0191359	Ppp2r3d	protein_coding	chr9:124422622-124476898:-	gi|148705237|gb|EDL37184.1|
ENSMUSG00000093805	0.0629608	0	0	0	Gm9994	protein_coding	chr1:93918311-93942650:+	gi|568907961|ref|XP_006529115.1|
ENSMUSG00000093847	0.0438683	0	0	0	Gm5039	protein_coding	chr12:88320122-88324026:-	gi|169808420|ref|NP_001116134.1|
ENSMUSG00000093910	0.0388947	0	0.00628833	0	Zfp853	protein_coding	chr5:143287038-143293623:-	gi|755477132|ref|XP_011236306.1|
ENSMUSG00000093954	0.0418179	0.152191	0.119162	0.152919	Gm16867	protein_coding	chr14:69363504-69503362:-	gi|755549752|ref|XP_011243597.1|
ENSMUSG00000094076	0.00646186	0.0237647	0.0355207	0.0840165	Gm4767	protein_coding	chr10:81812186-81826490:+	gi|755536119|ref|XP_011241947.1|
ENSMUSG00000094595	0.0700604	0.0286289	0.0203887	0.0113865	Fsbp	protein_coding	chr4:11579665-11587591:+	gi|371502134|ref|NP_001243071.1|
ENSMUSG00000094786	5.45132	15.4073	24.3538	11.559	Gm14403	protein_coding	chr2:177498215-177509763:+	gi|148669045|gb|EDL01102.1|
ENSMUSG00000094793	471.602	1230	2.91063	1052.09	Mup12	protein_coding	chr4:60737383-60741326:-	gi|317008598|ref|NP_001186924.1|
ENSMUSG00000095315	0.940489	2.05883	2.57406	1.96524	Gm10130	protein_coding	chr2:150323702-150363071:+	gi|225007554|ref|NP_081293.4|
ENSMUSG00000095562	0.710677	1.726	0.130075	1.56908	Gm21887	protein_coding	chrX:170009659-170019281:+	gi|28193093|emb|CAD62281.1|
ENSMUSG00000095845	0.186173	0	0	0	Gm5741	protein_coding	chr8:85067568-85067982:-	gi|306922426|ref|NP_001182460.1|
ENSMUSG00000096010	4.91986	1.43809	1.31383	1.72889	Hist4h4	protein_coding	chr6:136801553-136804415:-	gi|625190804|ref|XP_007637951.1|
ENSMUSG00000096035	0.0464458	0	0.0168956	0	Gm1045	protein_coding	chr5:91987475-91995320:+	gi|26345332|dbj|BAC36317.1|
ENSMUSG00000096316	0.0765221	0	0	0	Faiml	protein_coding	chr9:99229376-99237239:-	gi|348041355|ref|NP_001231691.1|
ENSMUSG00000096674	0.308074	16.5364	0.0960585	5.94126	Mup15	protein_coding	chr4:61435790-61439743:-	gi|317008616|ref|NP_001186933.1|
ENSMUSG00000096688	75.93	932.035	6.12383	440.565	Mup17	protein_coding	chr4:61591929-61595871:-	gi|317008620|ref|NP_001186935.1|
ENSMUSG00000096718	0.00500489	0.0705579	0.0752528	0.0457545	Zfp781	protein_coding	chr10:81901911-81930480:-	gi|755534734|ref|XP_011241795.1|
ENSMUSG00000097129	0.00554931	0.0680288	0.037682	0.0946989	4930507D05Rik	protein_coding	chr10:62449489-62451322:+	gi|148700152|gb|EDL32099.1|
ENSMUSG00000098132	0.0815126	0.0249815	0.0367119	0.035485	Rassf10	protein_coding	chr7:112953962-112957457:+	gi|26338081|dbj|BAC32726.1|
ENSMUSG00000098470	2.16202	0.713969	0.686901	0.863129	C1rb	protein_coding	chr6:124570294-124581171:+	gi|164518919|ref|NP_001106827.1|
ENSMUSG00000099032	1.09226	0.0714132	0.0894733	0.0858005	Tcf24	protein_coding	chr1:9960163-9967932:-	gi|549806786|ref|NP_001272354.1|
ENSMUSG00000100486	0.0108386	0.0664349	0.141939	0.0792688	Gm4131	protein_coding	chr14:62463414-62566921:-	gi|568900759|ref|XP_006543249.1|
ENSMUSG00000104301	0.0166147	0	0	0	Wdr49	protein_coding	chr3:75274988-75482156:-	gi|568925046|ref|XP_006502561.1|
ENSMUSG00000107504	0.0846196	0	0.0149247	0	Gm35549	protein_coding	chr9:122822776-122844035:-	gi|755481780|ref|XP_011236470.1|
ENSMUSG00000108900	0.044736	0	0	0	C430049E01Rik	protein_coding	chr8:71520120-71525711:-	gi|407263515|ref|XP_003945491.1|
ENSMUSG00000108976	0.175241	0.0330503	0.0130764	0	Gm29797	protein_coding	chr2:181657034-181659467:+	gi|568920546|ref|XP_006500815.1|
ENSMUSG00000110218	0.0802004	0.00983174	0.217837	0.185741	Gm20219	protein_coding	chr17:56551414-56554387:-	gi|148706224|gb|EDL38171.1|
ENSMUSG00000113061	27.7658	10.4005	10.5395	11.4246	AL607105.1	protein_coding	chr13:28257528-28258134:+	gi|332245592|ref|XP_003271942.1|
ENSMUSG00000113805	0.140378	0	0	0	AC126554.8	protein_coding	chr12:87494721-87495155:+	gi|148671011|gb|EDL02958.1|
ENSMUSG00000046747	0.0630833	0	0.010199	0	Gm9812	pseudogene	chr12:55820611-55821580:+	gi|12853206|dbj|BAB29681.1|
ENSMUSG00000068964	0.6524	1.43959	1.64545	1.31213	Gm6361	pseudogene	chr15:31446380-31446817:-	gi|226823223|ref|NP_001152823.1|
ENSMUSG00000088025	1.26341	0	0	0	Rprl3	ribozyme	chr8:3803069-3803358:-	gi|426376198|ref|XP_004054894.1|
ENSMUSG00000064655	0.310761	1.23812	1.43191	0.946989	Gm25788	snoRNA	chr4:123291344-123291474:+	.
ENSMUSG00000064844	0.469728	2.4953	2.4302	1.71769	Gm26202	snoRNA	chr18:75001880-75001944:+	.
ENSMUSG00000064984	0.898009	2.93564	2.61336	2.91896	Snord73a	snoRNA	chr3:86138791-86138858:-	.
ENSMUSG00000065336	0	0.723274	0.429247	0.809058	Snora34	snoRNA	chr15:98519716-98519853:-	.
ENSMUSG00000065725	0.516247	1.80819	1.28774	1.25854	Gm26165	snoRNA	chr2:144261589-144261726:-	.
ENSMUSG00000070166	0.688699	3.00186	3.19192	2.05205	Gm25821	snoRNA	chr12:21287927-21288059:+	.
ENSMUSG00000077607	0.0776903	1.33336	0.753639	1.42048	Gm25803	snoRNA	chr4:81338274-81338404:-	.
ENSMUSG00000077617	0.385509	1.13423	2.69255	2.63148	Gm25501	snoRNA	chr3:127005369-127005500:+	.
ENSMUSG00000077733	0.477067	1.85198	3.70225	2.22912	Gm23608	snoRNA	chr2:10075653-10075780:-	.
ENSMUSG00000084625	1.10256	0.103971	0.164545	0.206759	Gm25544	snoRNA	chr2:22902388-22902507:+	.
ENSMUSG00000088412	0.0701892	1.20463	0.953224	0.598889	Gm24241	snoRNA	chr10:92688864-92689008:-	.
ENSMUSG00000088856	0.989473	2.33934	3.22233	2.06759	Gm24727	snoRNA	chr8:33691801-33691944:+	.
ENSMUSG00000089252	1.70981	0	0.631851	0	Gm25715	snoRNA	chr16:86845470-86845594:+	.
ENSMUSG00000064565	0.0624382	0.688886	0.726823	1.29383	Gm24145	snRNA	chr16:11167105-11167267:-	.
ENSMUSG00000064702	0.799275	0.195966	0.0516894	0	Gm24950	snRNA	chr11:101641748-101641938:+	gi|156914686|gb|AAI52592.1|
ENSMUSG00000064738	0.0628237	0.847169	0.731309	1.30182	Gm23054	snRNA	chr3:88862919-88863080:+	.
ENSMUSG00000065251	3.72995	1.24112	1.65406	1.49386	Gm23971	snRNA	chr11:101645740-101645930:-	gi|156914686|gb|AAI52592.1|
ENSMUSG00000065767	2.39782	0.718541	0.723652	0.779407	Gm23849	snRNA	chr11:101627366-101627556:+	gi|156914686|gb|AAI52592.1|
ENSMUSG00000065892	0.856046	0	0.092268	0	Gm24521	snRNA	chr19:12665255-12665361:+	gi|537152882|gb|ERE72362.1|
ENSMUSG00000065919	0.768108	0	0	0	Gm24449	snRNA	chr12:69586153-69586258:-	.
ENSMUSG00000087779	0.692342	0	0.201483	0	Gm23765	snRNA	chr11:85493759-85493905:+	.
ENSMUSG00000088490	4.09	1.16603	1.75309	1.85504	Gm24400	snRNA	chr19:43857245-43857351:-	.
ENSMUSG00000089092	2.08175	0.425335	0.673137	0.140972	Gm25654	snRNA	chr13:64296437-64296524:-	.
ENSMUSG00000089185	0.131322	1.04641	1.2102	0.560251	Gm22940	snRNA	chr4:11279265-11279419:-	.
ENSMUSG00000089296	0.39524	6.17768	1.91702	2.52929	Gm23205	snRNA	chr18:38297939-38298041:+	.
ENSMUSG00000095676	2.80757	0.752891	0.680874	1.39028	Gm25099	snRNA	chr4:117189942-117190057:+	gi|149031679|gb|EDL86642.1|
ENSMUSG00000096280	1.49152	0	0	0	Gm23287	snRNA	chr4:117210844-117210959:+	gi|149031679|gb|EDL86642.1|
ENSMUSG00000074355	0.0853122	0.0426083	0.0367812	0.0346632	Gm10676	TEC	chr7:18989554-18992774:-	gi|148691149|gb|EDL23096.1|
ENSMUSG00000102152	0.140378	0	0.00972677	0.0122222	Gm37475	TEC	chr9:108469346-108470360:+	gi|344254378|gb|EGW10482.1|
ENSMUSG00000102194	0.0681435	0.201471	0.174979	0.31759	Gm38169	TEC	chr1:180021062-180023600:+	gi|148709746|gb|EDL41692.1|
ENSMUSG00000102205	0.151783	0.332967	0.317723	0.321337	9430092D12Rik	TEC	chr16:77413643-77414916:+	.
ENSMUSG00000102305	0.20939	0.05404	0.0320715	0.0201498	Gm38192	TEC	chr9:73024293-73026139:+	gi|68062212|ref|XP_673109.1|
ENSMUSG00000102317	0.0112251	0	0	0	Gm37628	TEC	chr1:25686062-25691501:-	gi|68062212|ref|XP_673109.1|
ENSMUSG00000102376	0.121218	0.0237761	0.258693	0.0354614	Gm37975	TEC	chr2:11532596-11534694:-	gi|148706477|gb|EDL38424.1|
ENSMUSG00000102457	0.0204915	0.0628011	0	0	Gm38342	TEC	chr1:16618560-16621539:+	gi|880867652|ref|XP_012966367.1|
ENSMUSG00000102504	0.0020486	0.0376705	0.0298088	0.0199768	Gm21955	TEC	chr4:42714926-42719893:+	gi|672019234|ref|XP_008774154.1|
ENSMUSG00000102599	0.0178499	0	0.0028859	0	Gm38386	TEC	chr2:6479690-6483110:+	gi|148666327|gb|EDK98743.1|
ENSMUSG00000102647	0.0281367	0	0	0	Gm38024	TEC	chr1:8450960-8453491:-	gi|68062212|ref|XP_673109.1|
ENSMUSG00000102786	0.0194523	0.13354	0.0528354	0.0711328	Gm38252	TEC	chr3:51884276-51886891:-	.
ENSMUSG00000102813	0.211081	1.15683	1.97132	0.781969	Gm37795	TEC	chr4:150068539-150070997:+	gi|68062078|ref|XP_673041.1|
ENSMUSG00000102833	0.0855966	0.0104933	0	0	Gm9694	TEC	chr1:155973318-155974506:+	.
ENSMUSG00000102931	0.107392	0.465843	0.216365	0.251736	Gm38114	TEC	chr6:72642854-72644085:-	.
ENSMUSG00000103066	0.229566	0	0	0	Gm36967	TEC	chr2:136679961-136680226:+	.
ENSMUSG00000103143	0.214854	0.0344914	0.0620299	0.0810617	Gm37742	TEC	chr2:13036126-13040104:+	.
ENSMUSG00000103253	0.0304714	0	0	0	Gm37520	TEC	chr2:11190641-11193312:-	.
ENSMUSG00000103261	0.0226922	0	0	0	Gm36981	TEC	chr3:84058968-84063452:-	.
ENSMUSG00000103368	0.0331693	0	0	0	Gm36927	TEC	chr9:85342511-85344351:-	.
ENSMUSG00000103388	0.422343	1.0355	0.88934	1.89599	Gm37581	TEC	chr9:72357227-72358214:+	gi|74205004|dbj|BAE20979.1|
ENSMUSG00000103553	0.412393	0.178273	0.115802	0.108473	Gm38218	TEC	chr1:66821226-66825914:-	gi|148701441|gb|EDL33388.1|
ENSMUSG00000103656	0.111595	0.287287	0.223723	0.294723	Gm37205	TEC	chr1:61654423-61657158:+	.
ENSMUSG00000103846	0.142112	0.777267	0.445384	0.519674	Gm37809	TEC	chr1:160913472-160914402:+	.
ENSMUSG00000103857	0.184464	0.0739283	0.0860289	0.06486	Gm37249	TEC	chr9:99307583-99310451:+	.
ENSMUSG00000103951	0.231428	0.527826	0.934537	0.570748	Gm37269	TEC	chr6:139776430-139778320:+	gi|148698044|gb|EDL29991.1|
ENSMUSG00000103952	0.105123	0.0525024	0	0.0189833	Gm37268	TEC	chr3:41773181-41775794:+	gi|148695951|gb|EDL27898.1|
ENSMUSG00000103959	0.114814	0	0.00795542	0	Gm37720	TEC	chr5:57984212-57985452:+	.
ENSMUSG00000103970	0.0888083	0.010887	0.0172298	0.292278	Gm37678	TEC	chr9:108544214-108545359:+	gi|148680200|gb|EDL12147.1|
ENSMUSG00000104010	0.186092	0.0814746	0.0343846	0.0594084	Gm37366	TEC	chr1:195042383-195044679:+	gi|67975423|ref|XP_668908.1|
ENSMUSG00000104118	0.147347	0.0612857	0.0408384	0.0641446	Gm37298	TEC	chr1:137909291-137913158:+	gi|148680200|gb|EDL12147.1|
ENSMUSG00000104376	0.0416681	0	0	0	Gm37516	TEC	chr1:182679939-182681892:+	.
ENSMUSG00000104454	0.0132003	0.283189	0.0704277	0.0804511	Gm37827	TEC	chr7:36733017-36734558:+	.
ENSMUSG00000104486	0.0373712	0	0	0	Gm38066	TEC	chr3:30160253-30161886:-	.
ENSMUSG00000104508	0.0723857	0	0	0.0088233	Gm37735	TEC	chr1:68639424-68640829:-	.
ENSMUSG00000104634	0.00884994	0.130189	0.0600946	0.097087	Gm42461	TEC	chr5:49943409-49944558:-	.
ENSMUSG00000104686	0.0830811	0.169748	0.167903	0.185661	Gm42815	TEC	chr5:138619288-138620757:+	.
ENSMUSG00000104906	0.219883	0.0385077	0.0152356	0.536043	Gm43005	TEC	chr3:126662379-126663026:+	.
ENSMUSG00000105033	0.0583234	0	0.160301	0.171806	Gm43423	TEC	chr5:107158478-107160571:-	gi|148701441|gb|EDL33388.1|
ENSMUSG00000105079	0.0299888	0.00459539	0	0	Gm43715	TEC	chr5:57904639-57907353:+	gi|148691967|gb|EDL23914.1|
ENSMUSG00000105107	0	0.0221371	0.0630618	0.0264135	Gm43412	TEC	chr5:123036000-123038817:+	gi|148687707|gb|EDL19654.1|
ENSMUSG00000105179	0.446649	1.19327	0.977108	0.953696	Gm42866	TEC	chr5:121742417-121745720:+	.
ENSMUSG00000105217	0.0530689	0.130114	0.137279	0	Gm42873	TEC	chr3:133052545-133054270:-	.
ENSMUSG00000105259	0.040159	0.154725	0.172521	0.202797	Gm42874	TEC	chr3:133050622-133052395:-	gi|537176391|gb|ERE75120.1|
ENSMUSG00000105358	0.00776755	0.29995	0.0244886	0.0686436	Gm43099	TEC	chr3:108287881-108293121:+	gi|74150612|dbj|BAE25459.1|
ENSMUSG00000105590	0.0186514	0	0	0	Gm43364	TEC	chr5:108550081-108553354:-	.
ENSMUSG00000105774	0.0381177	0.140185	0.172556	0.247801	Gm43006	TEC	chr3:126657722-126659323:+	.
ENSMUSG00000105992	0.0927329	0.483144	1.30436	0.339104	Gm43651	TEC	chr3:116532149-116532587:+	.
ENSMUSG00000106214	0.0313514	0	0	0	Gm43426	TEC	chr5:48058051-48060647:+	.
ENSMUSG00000106291	0.0530766	0.195199	0.630719	0.420528	1110003F10Rik	TEC	chr5:65405751-65406517:+	gi|148701441|gb|EDL33388.1|
ENSMUSG00000106430	0.0198236	0.058324	0.061536	0.0918215	Gm42460	TEC	chr5:50059096-50061662:+	.
ENSMUSG00000106498	0.0195532	0	0	0	Gm43032	TEC	chr5:19198483-19201605:-	.
ENSMUSG00000106680	0.177578	0.380961	0.54908	0.608779	Gm43852	TEC	chr5:32713072-32713988:-	.
ENSMUSG00000106691	0.0138941	0.18736	0.128042	0.254039	2700029L08Rik	TEC	chr5:134519325-134520789:-	.
ENSMUSG00000106758	0.0372118	0.136854	0.276748	0.234352	Gm42731	TEC	chr5:135471779-135473419:-	.
ENSMUSG00000106786	0.0374308	0	0	0	Gm42781	TEC	chr3:39636059-39638777:+	.
ENSMUSG00000106944	0.070543	0	0.00622097	0	Gm43843	TEC	chr6:18429659-18431245:-	.
ENSMUSG00000106991	0.0257222	0	0	0	Gm43399	TEC	chr5:119595831-119598204:-	.
ENSMUSG00000107134	0.0029776	0.0693543	0.0288844	0.0508127	Gm42528	TEC	chr5:39606927-39610344:-	.
ENSMUSG00000107374	0.0142875	0.10509	0.143216	0.133518	Gm43172	TEC	chr5:93090994-93093130:+	.
ENSMUSG00000107502	0.0288558	0	0	0	Gm44065	TEC	chr6:97148194-97151720:+	.
ENSMUSG00000107676	0.0451559	0	0.0168476	0	Gm44178	TEC	chr6:88919708-88922637:+	gi|67975423|ref|XP_668908.1|
ENSMUSG00000107706	0.0187464	0.0528567	0.0854698	0.0708367	Gm44022	TEC	chr6:148385901-148391329:-	.
ENSMUSG00000107861	0.340328	0.913882	1.11618	1.14574	Gm44253	TEC	chr6:43277755-43278382:+	.
ENSMUSG00000107949	0.49646	0.0608609	0	0.0907724	Gm44157	TEC	chr6:115608170-115608579:+	.
ENSMUSG00000107964	0.109671	0	0	0	4930447C11Rik	TEC	chr6:146846276-146847203:-	.
ENSMUSG00000108035	0.0665759	0.00709698	0.00561586	0.0211699	Gm44021	TEC	chr6:148361141-148364656:-	.
ENSMUSG00000108048	0.0842602	0	0	0	Gm43990	TEC	chr6:15836089-15837779:+	.
ENSMUSG00000108126	0.0434006	0	0	0	Gm43909	TEC	chr6:145863297-145865172:+	gi|13277378|ref|NP_077789.1|
ENSMUSG00000108217	0.0162839	0	0	0	Gm43883	TEC	chr6:46785953-46789702:+	gi|148675219|gb|EDL07166.1|
ENSMUSG00000108278	0.0409745	0	0	0.0115258	Gm44194	TEC	chr6:71538510-71541738:-	gi|440911230|gb|ELR60928.1|
ENSMUSG00000108359	0.265868	0.0130371	0.536446	1.06296	C430039J01Rik	TEC	chr7:116409847-116410803:-	gi|148674380|gb|EDL06327.1|
ENSMUSG00000108543	0.0871356	0.235002	0.428267	0.43901	Gm44735	TEC	chr7:126938886-126940637:+	gi|148680200|gb|EDL12147.1|
ENSMUSG00000108658	0.139868	0.312669	0.319246	0.290834	Gm45138	TEC	chr7:18864166-18865402:+	gi|148668218|gb|EDL00548.1|
ENSMUSG00000108808	0.0300663	0.221149	0.226036	0.311513	Gm45204	TEC	chr7:127812154-127813507:-	gi|148685013|gb|EDL16960.1|
ENSMUSG00000109216	0.168274	0.00764022	0.0181372	0.0835647	Gm44907	TEC	chr7:90457252-90458884:+	.
ENSMUSG00000109243	0.0746726	0.161543	0.153395	0.208812	Gm45867	TEC	chr7:81874204-81876520:+	gi|148674967|gb|EDL06914.1|
ENSMUSG00000109302	0.483872	0.988628	1.43944	0.196602	Gm44967	TEC	chr7:80994683-80995313:+	.
ENSMUSG00000109563	0.239268	0.869478	0.986439	0.739542	Gm44772	TEC	chr7:107623971-107625161:+	gi|12856381|dbj|BAB30647.1|
ENSMUSG00000109719	0.0140508	0.0631575	0.0863234	0.10847	Gm45266	TEC	chr8:27168840-27171012:-	.
ENSMUSG00000109778	0.265666	0.0769788	0.674734	0.117756	Gm45504	TEC	chr8:88860968-88863074:-	.
ENSMUSG00000110030	0.0255074	0	0	0.0725471	Gm45546	TEC	chr8:70610425-70612818:+	.
ENSMUSG00000110378	0.0430234	0	0.00463724	0	Gm45242	TEC	chr8:64945590-64947718:-	gi|148696733|gb|EDL28680.1|
ENSMUSG00000110400	0.0924801	0.283428	0.246705	0.422725	Gm45416	TEC	chr7:141516403-141518603:-	gi|149036607|gb|EDL91225.1|
ENSMUSG00000110499	0.063775	0.299696	0.231995	0.278558	Gm45873	TEC	chr8:94048781-94050695:+	gi|148701441|gb|EDL33388.1|
ENSMUSG00000110914	0.0278834	0.0781306	0.189339	0.315601	AC156031.2	TEC	chr9:41109527-41112081:-	.
ENSMUSG00000110928	0.0579832	0.0135393	0.0214274	0.0201935	AC132474.1	TEC	chr9:40363217-40366902:-	gi|148693242|gb|EDL25189.1|
ENSMUSG00000111292	0.135599	0.38787	0.467692	0.523403	AC159308.4	TEC	chr9:22294222-22295572:-	.
ENSMUSG00000111421	0.0251605	0.150366	0.131188	0.126509	AC138284.1	TEC	chr9:37296126-37299361:-	gi|148701441|gb|EDL33388.1|
ENSMUSG00000111424	1.17314	2.62409	3.35459	3.95377	AC159308.5	TEC	chr9:22228978-22231302:+	gi|148691168|gb|EDL23115.1|
ENSMUSG00000112448	0.036348	0	0	0	AC130661.1	TEC	chr12:44409790-44411469:+	.
ENSMUSG00000112512	0.0228066	0.132803	0.116149	0.0694989	AC121844.3	TEC	chr10:105392502-105394286:-	gi|148673496|gb|EDL05443.1|
ENSMUSG00000112543	0.10425	0	0	0	AC121986.1	TEC	chr10:9223971-9224751:-	.
ENSMUSG00000112592	0.156327	0.0330415	0.0244028	0.017522	AC153517.1	TEC	chr10:60808660-60814323:-	gi|74206905|dbj|BAE33259.1|
ENSMUSG00000112944	0.0757366	0.169683	0.012667	0.159168	AL645643.1	TEC	chr13:32095279-32099175:-	.
ENSMUSG00000113250	0.0253296	0.229781	0.0786276	0.203775	AC123705.2	TEC	chr12:100624785-100626793:-	.
ENSMUSG00000113391	0.0831943	0	0	0.0112675	AC132433.1	TEC	chr13:8797302-8798402:-	gi|68062440|ref|XP_673226.1|
ENSMUSG00000113665	0.0881163	0.0392805	0	0.0292929	CT009757.5	TEC	chr13:63253024-63255564:-	.
ENSMUSG00000114081	0.0449411	0.110186	0.130786	0.189623	AC136986.2	TEC	chr12:28789669-28792612:+	.
ENSMUSG00000055676	0.0153275	0.112739	0.163553	0.205514	Gm5069	transcribed_processed_pseudogene	chr1:180326970-180330550:-	gi|576080555|ref|NP_001276655.1|
ENSMUSG00000072492	0.137947	0	0	0	Gm10364	transcribed_processed_pseudogene	chr14:55038462-55042979:+	gi|472368647|ref|XP_004403848.1|
ENSMUSG00000080862	0.145913	0.0223593	0.017693	0	Gm14523	transcribed_processed_pseudogene	chrX:23364506-23365063:-	gi|26342184|dbj|BAC34754.1|
ENSMUSG00000083152	0.0649623	0.424731	0.483131	0.316738	Apc-ps1	transcribed_processed_pseudogene	chr5:76196625-76197094:+	gi|625245133|ref|XP_007613812.1|
ENSMUSG00000091366	0	0.325473	0.137359	0.107874	Gm17040	transcribed_processed_pseudogene	chr9:107292435-107297192:-	gi|472344291|ref|XP_004391892.1|
ENSMUSG00000091957	73.6783	29.7367	33.9763	30.3518	Rps2-ps10	transcribed_processed_pseudogene	chr18:61259008-61259972:-	gi|2920833|gb|AAC04625.1|
ENSMUSG00000094772	0.269244	0.754436	0.791008	0.675133	Rpl29-ps2	transcribed_processed_pseudogene	chr13:4609334-4615025:+	gi|148700311|gb|EDL32258.1|
ENSMUSG00000097979	0.0487892	0.215318	0.170382	0.154624	Gm4691	transcribed_processed_pseudogene	chr6:128202150-128203276:-	gi|795107208|ref|XP_011807244.1|
ENSMUSG00000111163	0.0160806	0.00197132	0	0	AC125374.2	transcribed_unitary_pseudogene	chr9:122935812-122942819:+	gi|823384268|ref|XP_012409789.1|
ENSMUSG00000002791	0.0181481	0.0622934	0.0774604	0.0619393	Pdxk-ps	transcribed_unprocessed_pseudogene	chr17:32076083-32107350:-	gi|26006861|ref|NP_742146.1|
ENSMUSG00000041449	0.972321	0.165309	0.185887	0.224927	Serpina3h	transcribed_unprocessed_pseudogene	chr12:104247905-104253669:+	gi|148686850|gb|EDL18797.1|
ENSMUSG00000073403	0.179058	0.0424852	0.0672373	0	Gm10499	transcribed_unprocessed_pseudogene	chr17:36141758-36145923:-	gi|568904543|ref|XP_006544859.1|
ENSMUSG00000082286	2.50816	7.05841	5.49543	5.57085	Pisd-ps1	transcribed_unprocessed_pseudogene	chr11:3125904-3131004:+	gi|148705450|gb|EDL37397.1|
ENSMUSG00000082305	0.0264349	0	0	0	Gm2420	transcribed_unprocessed_pseudogene	chr5:32720330-32736194:+	gi|124358938|ref|NP_084483.2|
ENSMUSG00000085006	0.209902	0.667638	0.0495285	0.677673	BC021767	transcribed_unprocessed_pseudogene	chr3:94661830-94670696:-	gi|148706800|gb|EDL38747.1|
ENSMUSG00000092574	0.00863226	0.0740758	0.159102	0.231486	2810047C21Rik1	transcribed_unprocessed_pseudogene	chr7:8086326-8093041:-	gi|110625910|ref|NP_663552.2|
ENSMUSG00000093610	0.119735	0.279585	0.0331855	0.597691	Cyp2c53-ps	transcribed_unprocessed_pseudogene	chr19:39229254-39274985:+	gi|74143165|dbj|BAE24131.1|
ENSMUSG00000102051	0.408118	0	0	0.139912	I830127L07Rik	transcribed_unprocessed_pseudogene	chr15:75131377-75135128:-	gi|149266697|ref|XP_001477152.1|
ENSMUSG00000109176	0.0862799	0	0	0	Zfp264	transcribed_unprocessed_pseudogene	chr7:6977246-6991087:+	gi|731200246|ref|XP_010615163.1|
ENSMUSG00000109654	0.0238667	0	0.00330743	0.00415597	Gm3912	transcribed_unprocessed_pseudogene	chr7:7362898-7374624:-	gi|110625910|ref|NP_663552.2|
ENSMUSG00000110199	0.0680343	0.015445	0.014666	0.0215001	Olfr542-ps1	transcribed_unprocessed_pseudogene	chr7:140717473-140722112:+	gi|32054917|gb|AAP71031.1|
ENSMUSG00000074981	0.00997421	0	0.00120944	0	Dcdc5	unitary_pseudogene	chr2:106003336-106406151:+	gi|755472816|ref|XP_011250081.1|
ENSMUSG00000036322	3.23423	0	0	0	H2-Ea-ps	unprocessed_pseudogene	chr17:34342933-34344643:-	gi|494389|pdb|1MYI|A
ENSMUSG00000073840	0.78288	0.023408	0.0370457	0.023275	Mup-ps2	unprocessed_pseudogene	chr4:60155274-60157966:+	gi|124486865|ref|NP_001074754.1|
ENSMUSG00000074418	0.0299777	0	0	0	Gm15930	unprocessed_pseudogene	chr7:3756905-3764030:-	gi|309268617|ref|XP_003084730.1|
ENSMUSG00000081723	0.379181	0.0808411	0.122609	0.167462	Gm15931	unprocessed_pseudogene	chr7:4274189-4282645:+	gi|6679333|ref|NP_032874.1|
ENSMUSG00000081982	2.51295	0	0	0	Sult2a-ps2	unprocessed_pseudogene	chr7:13846161-13847616:+	gi|148706099|gb|EDL38046.1|
ENSMUSG00000082065	0.516524	1.73545	1.18769	0.163231	Mup-ps14	unprocessed_pseudogene	chr4:61608292-61610983:+	gi|124486865|ref|NP_001074754.1|
ENSMUSG00000082141	0.856354	0.201885	0.303529	1.907	Gm11212	unprocessed_pseudogene	chr4:63350411-63353846:+	gi|112879|sp|P21350.1|A1AG1_MUSCR
ENSMUSG00000082173	0.128133	0	0	0	Mup-ps10	unprocessed_pseudogene	chr4:61243577-61246293:+	gi|124486865|ref|NP_001074754.1|
ENSMUSG00000082377	0.045147	0.00790652	0	0.00786157	Gm14415	unprocessed_pseudogene	chr2:177103564-177106488:-	gi|148669045|gb|EDL01102.1|
ENSMUSG00000082586	2.80551	0	0	0	Sult2a-ps1	unprocessed_pseudogene	chr7:13721079-13722465:-	gi|148706099|gb|EDL38046.1|
ENSMUSG00000082644	60.4763	121.279	3.40503	189.764	Mup-ps19	unprocessed_pseudogene	chr4:61957149-61959911:-	gi|59858561|ref|NP_001012323.1|
ENSMUSG00000083623	0.103449	0.00603896	0	0	Gm7224	unprocessed_pseudogene	chr7:42047948-42050212:-	gi|148688805|gb|EDL20752.1|
ENSMUSG00000090478	0.0650019	0	0	0	Gm5656	unprocessed_pseudogene	chr12:103699528-103704619:-	gi|672057093|ref|XP_006240575.2|
ENSMUSG00000091902	0.0582995	0	0	0.172581	Gm6918	unprocessed_pseudogene	chr12:103834650-103842339:-	gi|148686870|gb|EDL18817.1|
ENSMUSG00000092075	2.07977	5.2155	0.0613686	5.67745	Serpina4-ps1	unprocessed_pseudogene	chr12:104080649-104086724:+	gi|537157071|gb|ERE72986.1|
ENSMUSG00000094743	0.0373484	1.00728	0.50722	0.204862	Mup-ps7	unprocessed_pseudogene	chr4:60677683-60680431:+	gi|124486865|ref|NP_001074754.1|
ENSMUSG00000096652	0.149394	0	0	0	Mup-ps9	unprocessed_pseudogene	chr4:61163063-61165771:+	gi|124486865|ref|NP_001074754.1|
ENSMUSG00000096891	0	1.73984	0.21738	0.386962	Mup-ps8	unprocessed_pseudogene	chr4:60756812-60759526:+	gi|124486865|ref|NP_001074754.1|
ENSMUSG00000098330	1.18532	22.7483	4.63897	11.6582	Gtpbp4-ps1	unprocessed_pseudogene	chr7:14724656-14724904:-	gi|532045314|ref|XP_005365462.1|
ENSMUSG00000099055	0.212917	0.522029	0.0206541	0.467155	Zfp-ps	unprocessed_pseudogene	chr7:14566761-14567238:+	gi|568946456|ref|XP_006540375.1|
ENSMUSG00000099242	1.6049	3.79093	0.626535	3.24453	Obox4-ps3	unprocessed_pseudogene	chr7:14548714-14549233:+	gi|18389931|gb|AAL68803.1|
ENSMUSG00000099871	0.111432	0	0	0	Gm21742	unprocessed_pseudogene	chrY:90837413-90844040:+	gi|300797197|ref|NP_001180209.1|
ENSMUSG00000101639	0.156011	0.0112502	0	0	Gm8597	unprocessed_pseudogene	chr17:13394025-13404191:-	gi|223461164|gb|AAI39461.1|
ENSMUSG00000101660	0.49931	0.234422	0.185499	0.0906461	Gm18666	unprocessed_pseudogene	chr1:93906244-93916768:+	gi|755495341|ref|XP_011246430.1|
ENSMUSG00000102493	0.326424	0.0428745	0.0339267	0.0426308	Gm8010	unprocessed_pseudogene	chr1:178143301-178144272:+	gi|8394490|ref|NP_058605.1|
ENSMUSG00000106040	2.48782	0	0.210955	0.0318091	Cyp3a63-ps	unprocessed_pseudogene	chr5:145624092-145633993:-	gi|28893549|ref|NP_796354.1|
ENSMUSG00000107568	0.382157	0	0	0.0245169	Gm18840	unprocessed_pseudogene	chr6:124561215-124563785:+	gi|198278496|ref|NP_001128027.1|
ENSMUSG00000108606	0.461526	0	0.192976	0	Cyp2b27-ps	unprocessed_pseudogene	chr7:26004605-26028906:-	gi|38454204|ref|NP_942028.1|
ENSMUSG00000110714	0.40588	0.0248783	0.0393726	0.148421	Gm45910	unprocessed_pseudogene	chr8:93141331-93154116:-	gi|2921308|gb|AAC04708.1|
ENSMUSG00000110812	0.473369	0	0	0	AC159896.1	unprocessed_pseudogene	chr9:36381685-36381899:+	gi|148688540|gb|EDL20487.1|
ENSMUSG00000113767	0.15779	0	0.0255108	0	AC120540.2	unprocessed_pseudogene	chr12:87394444-87395548:+	gi|507650815|ref|XP_004632707.1|
ENSMUSG00000097773	0.188471	0.0786539	0.0855788	0.0635431	Gm10614	bidirectional_promoter_lncRNA	chr8:120589531-120593801:+	gi|74202470|dbj|BAE24828.1|
ENSMUSG00000109698	0.190678	0.803521	0.612707	0.929691	Gm45469	bidirectional_promoter_lncRNA	chr8:35367750-35376392:-	gi|344250225|gb|EGW06329.1|
ENSMUSG00000110366	0.042406	0	0	0	Gm45885	bidirectional_promoter_lncRNA	chr7:105400314-105401892:+	.
ENSMUSG00000037735	0.0769803	0	0.0155573	0.0156389	2810032G03Rik	lincRNA	chr12:5375870-5416631:+	--
ENSMUSG00000040705	0.0238534	0	0	0	A930016O22Rik	antisense	chr7:19417466-19421417:-	--
ENSMUSG00000044633	0.0357364	0.00912691	0.00577772	0.001815	B530045E10Rik	lincRNA	chr10:99298888-99423047:+	--
ENSMUSG00000045709	0.0673259	0	0	0	Smkr-ps	lincRNA	chr6:29985329-29993776:+	--
ENSMUSG00000048215	0.0485153	0.00660831	0	0	A630023P12Rik	lincRNA	chr5:110514923-110525980:+	--
ENSMUSG00000052658	0.20519	0.553392	0.676756	0.566921	5830454E08Rik	lincRNA	chr9:120577331-120578074:+	--
ENSMUSG00000052769	0.0773459	0.165932	0.156312	0.282837	Gm9889	lincRNA	chr3:115715150-115716728:+	--
ENSMUSG00000054556	0.0399376	0.114239	0.00645695	0.0892486	Gm4876	antisense	chr6:17065010-17171833:-	--
ENSMUSG00000055110	0.0309345	0	0	0	A630012P03Rik	antisense	chrX:52575843-52619047:+	--
ENSMUSG00000056418	0.0604771	0.00529562	0.00419044	0	BC043934	lincRNA	chr9:96435783-96438138:-	--
ENSMUSG00000072769	0.0118705	0.00181899	0	0	Gm10419	lincRNA	chr5:108367769-108378239:+	--
ENSMUSG00000074388	0.0571124	0.168033	0.387816	0.417696	Gm5544	lincRNA	chr3:97930173-97967018:+	--
ENSMUSG00000074805	0.040983	0	0.00662596	0	Il1bos	antisense	chr2:129369897-129375748:+	--
ENSMUSG00000075538	0.112148	0.0343705	0.0310828	0.0488216	Gm10855	sense_intronic	chr2:6932541-6935081:-	--
ENSMUSG00000084823	0.08388	0	0	0	Gm17216	lincRNA	chr6:148213367-148214573:-	--
ENSMUSG00000084936	0.28392	0.0803207	0.10593	0.0266214	Gm11583	antisense	chr11:97160990-97161675:+	--
ENSMUSG00000084954	0.124368	0	0	0	Gm16351	antisense	chr8:45547377-45605140:-	--
ENSMUSG00000084956	0.166616	0	0.0538755	0	Gm16194	lincRNA	chr17:29114145-29133811:+	--
ENSMUSG00000085081	0.130035	0.0425093	0	0.0422677	Rptoros	antisense	chr11:119820812-119834365:-	--
ENSMUSG00000085095	0	0.0260832	0.0309596	0.03458	Gm15635	antisense	chr7:99660130-99667500:+	--
ENSMUSG00000085105	0.0661378	0.197926	0.217003	0.199172	Gm12758	antisense	chr7:34234377-34240207:+	--
ENSMUSG00000085206	0.198446	0.451795	0.55001	0.466504	Gm13380	sense_intronic	chr2:20921860-20931389:-	--
ENSMUSG00000085250	0.144293	0.377361	0.0186629	0.316588	Gm15234	lincRNA	chr3:94658961-94660115:+	--
ENSMUSG00000085255	0.221249	0.67807	0.505898	0.443056	Taco1os	antisense	chr11:106065077-106066305:-	--
ENSMUSG00000085260	0.38624	0	0.0749349	0.02354	Med9os	antisense	chr11:59946889-59948142:-	--
ENSMUSG00000085298	0.0235589	0.154031	0.129503	0.201016	F730035M05Rik	lincRNA	chr12:70227841-70234165:+	--
ENSMUSG00000085326	0.294524	0	0.0634899	0	Gm15642	antisense	chr11:109437172-109438145:-	--
ENSMUSG00000085395	0.613533	0.0884857	0.105028	0.0219957	Gm13056	lincRNA	chr4:141278439-141279794:+	--
ENSMUSG00000085439	0.207377	1.74045	2.46043	0.486111	Rapgef4os1	antisense	chr2:72097603-72148796:-	--
ENSMUSG00000085595	0.0238907	0.109828	0.104289	0.123764	Gm16090	antisense	chr18:20597964-20665260:-	--
ENSMUSG00000085628	0.4837	1.11332	1.07249	1.0348	Appbp2os	antisense	chr11:85234775-85238304:+	--
ENSMUSG00000085657	0.0391691	0	0.0063327	0	Gm15984	antisense	chr5:74702598-74728605:+	--
ENSMUSG00000085696	0.00352282	0.056142	0.123024	0.0343525	Hoxaas3	antisense	chr6:52175217-52215076:+	--
ENSMUSG00000085715	0.0686646	0.030796	0.0016246	0.00408279	Tsix	antisense	chrX:103431517-103484957:+	--
ENSMUSG00000085762	0.489379	0.0406731	0.112647	0.161768	Lrrc75aos2	antisense	chr11:62605766-62607748:+	--
ENSMUSG00000085786	0.0593037	0.16777	0	0.150135	Gm15987	antisense	chr6:128951204-128975029:-	--
ENSMUSG00000085846	0.116314	0	0	0	Gm15597	antisense	chr17:27959615-27965316:-	--
ENSMUSG00000085889	0	0.47663	0.354973	1.03147	1700054M17Rik	antisense	chr2:118304914-118308166:+	--
ENSMUSG00000085952	0.122889	0	0.0216744	0	Gm12315	lincRNA	chr11:70623027-70625561:-	--
ENSMUSG00000085976	0	0.226845	0.124271	0.156154	Gm13816	lincRNA	chr2:92742230-92759208:+	--
ENSMUSG00000086199	0.019691	0	0	0	Bcas3os1	antisense	chr11:85702200-85719744:-	--
ENSMUSG00000086216	0.0856146	0	0.311441	0.313074	Gm13610	antisense	chr2:32232782-32236382:-	--
ENSMUSG00000086287	0.170436	0	0	0	Gm15972	antisense	chr18:23750447-23752305:-	--
ENSMUSG00000086353	0.0470089	0	0	0	Gm13481	lincRNA	chr2:48062548-48457245:-	--
ENSMUSG00000086372	0.0453675	0	0	0	Gm16246	antisense	chr12:57441190-57450120:-	--
ENSMUSG00000086468	0.237791	0.816218	0.749678	0.637669	Etaa1os	antisense	chr11:17953970-17959578:+	--
ENSMUSG00000086503	25.7312	0.0306291	0.017076	0.0124589	Xist	lincRNA	chrX:103460375-103483217:-	--
ENSMUSG00000086526	1.34856	0.439131	0.163523	0.462319	Gm12762	lincRNA	chr7:34230420-34234102:-	--
ENSMUSG00000086665	0.705367	1.575	1.56399	2.2416	Gm13067	lincRNA	chr4:150049013-150056976:+	--
ENSMUSG00000086942	0.0627591	0	0	0	Gm15489	antisense	chr7:122139008-122159401:-	--
ENSMUSG00000086960	0.610646	0.0311912	0.197454	0.248111	Gm13017	lincRNA	chr4:140391148-140396604:+	--
ENSMUSG00000087016	0.172499	0	0.0167334	0.0420528	Gm15979	sense_intronic	chr4:135430126-135430841:-	--
ENSMUSG00000087111	0	0.462092	0.274241	0.536043	Gm11399	antisense	chr11:3142048-3143363:+	--
ENSMUSG00000087142	0.0188123	0.219088	0.127743	0.206377	Gm12454	antisense	chr4:43504428-43508747:-	--
ENSMUSG00000087187	0.0494651	0.303195	0.227923	0.21103	Gm13431	lincRNA	chr2:36216777-36222934:+	--
ENSMUSG00000087263	0.219945	1.10303	0.0193962	4.85011	Gm15726	antisense	chrX:169979047-169985232:-	--
ENSMUSG00000087265	0.154908	0	0.0300538	0	Gm12349	lincRNA	chr11:100291671-100293711:+	--
ENSMUSG00000087277	0.0817465	0.334042	0	0.282322	2010013B24Rik	lincRNA	chr6:145303152-145308951:+	--
ENSMUSG00000087351	0.0379048	0.185869	0.183849	0.277219	Gm11464	lincRNA	chr2:165980726-165992517:-	--
ENSMUSG00000087439	0	0.0670058	0.116648	0.0799499	Gm15788	antisense	chr5:110262161-110277267:+	--
ENSMUSG00000087638	0.368599	1.83256	1.2912	0.923553	Gm11773	antisense	chr11:120831029-120834244:+	--
ENSMUSG00000087639	0.0766577	0	0	0	Gm15512	antisense	chr14:33365951-33370143:-	--
ENSMUSG00000087648	0.272124	0.0571878	0.0678794	0	E130018N17Rik	lincRNA	chr2:168152603-168154513:-	--
ENSMUSG00000087654	0.182555	0	0	0	Gm12256	antisense	chr11:58889710-58891548:+	--
ENSMUSG00000089671	0.26096	0.0710911	0.0281273	0.070687	Gm16537	antisense	chr15:99715543-99724474:-	--
ENSMUSG00000089679	0.0735895	0.0315746	0.171326	0.233221	Gm16299	antisense	chr19:53819354-53825128:-	--
ENSMUSG00000089714	0.313152	0.0363141	0.0451557	0.00515824	Gm16092	lincRNA	chr1:85511133-85527161:-	--
ENSMUSG00000089733	0.204665	0.0456179	0.0180488	0	Gm15628	lincRNA	chr14:75136270-75136912:-	--
ENSMUSG00000090135	0.015397	0.188752	0.164296	0.131375	Gm15809	sense_intronic	chr13:42998511-43006067:+	--
ENSMUSG00000090861	0.0359627	0.154303	0.156986	0.284933	Arf4os	antisense	chr14:26628407-26638183:-	--
ENSMUSG00000091079	0.234143	0.0765428	0.605686	0.551781	Gm17105	sense_intronic	chr14:24238172-24243391:-	--
ENSMUSG00000091154	0.718227	0.0936673	0.296477	0.18627	Proscos	antisense	chr8:27042377-27043042:-	--
ENSMUSG00000091881	0.300946	1.03971	0.0796184	1.50067	Gm17146	antisense	chr3:88722090-88722670:+	--
ENSMUSG00000092134	0.0438053	0	0	0	Gm17089	antisense	chr6:134233158-134243711:-	--
ENSMUSG00000092397	0.0432915	0	0	0	C130080G10Rik	antisense	chr2:114054335-114064868:+	--
ENSMUSG00000096573	0.0595172	0	0	0.00906839	1700009J07Rik	lincRNA	chr10:77893417-77896114:+	--
ENSMUSG00000096945	0.0142808	0	0	0	Gm26546	lincRNA	chr10:88379244-88383711:-	--
ENSMUSG00000097013	0.0113524	0.125252	0.115631	0.0484322	Gm26710	lincRNA	chr10:80578647-80580677:+	--
ENSMUSG00000097097	0.0290888	0	0	0	5033426O07Rik	lincRNA	chr8:121198714-121203602:-	--
ENSMUSG00000097122	0.0486054	0.139032	0.183361	0.138242	Gm26624	lincRNA	chr4:147136278-147457019:+	--
ENSMUSG00000097282	0.0574301	0.0150864	0	0	5031415H12Rik	lincRNA	chr17:70745329-70755582:-	--
ENSMUSG00000097358	0.0212917	0	0	0	Gm26773	lincRNA	chr14:118107831-118117100:+	--
ENSMUSG00000097372	0	0.0261342	0.0289521	0.129928	Gm26876	lincRNA	chr10:128645884-128649811:+	--
ENSMUSG00000097520	0.0162605	0	0	0	4930488L21Rik	antisense	chr8:93750147-93813722:-	--
ENSMUSG00000097576	0.0110624	0.0813684	0.193161	0.0809058	D930030I03Rik	lincRNA	chr16:38451982-38453493:+	--
ENSMUSG00000097632	0.0040775	0.0499859	0.0711972	0.0894632	4930552P12Rik	lincRNA	chr19:55640589-55702204:-	--
ENSMUSG00000097639	0.51824	1.15333	1.04798	1.6084	Platr4	lincRNA	chr3:41484024-41493192:-	--
ENSMUSG00000097674	0.298167	0.0487363	0.0289239	0.0242296	Gm26610	lincRNA	chr7:30650385-30652711:+	--
ENSMUSG00000097783	0.148273	0.443511	0.391225	0.44099	Gm26747	lincRNA	chr8:121421238-121428043:+	--
ENSMUSG00000097805	0.0277945	0	0	0	Gm17473	lincRNA	chr15:42676260-42704616:+	--
ENSMUSG00000097823	0.037532	0	0	0	Gm16701	lincRNA	chr1:166998295-167000841:-	--
ENSMUSG00000097834	0.0423354	0	0.0985625	0	Gm26911	antisense	chr6:101198569-101220141:+	--
ENSMUSG00000097852	0.00688129	0.160279	0.0667524	0.083878	4933405D12Rik	antisense	chr3:122864737-122924116:-	--
ENSMUSG00000097882	0	0.0203134	0.0192888	0.0686729	0610038B21Rik	antisense	chr8:77517056-77523898:+	--
ENSMUSG00000097942	0.126953	0	0.0205253	0	Gm26968	sense_intronic	chr4:83743677-83744157:+	--
ENSMUSG00000097961	0.0120872	0.103724	0.0938022	0.132601	Gm27000	lincRNA	chrX:88759471-88760312:-	--
ENSMUSG00000097986	0.0134741	0	0	0	Gm26953	lincRNA	chr5:112215461-112233720:+	--
ENSMUSG00000098196	0.269115	0.119966	0.0711972	0.581511	Gm26964	lincRNA	chr11:61865475-61867639:+	--
ENSMUSG00000099013	0.150036	0	0	0	Gm27153	antisense	chr15:66074552-66091807:+	--
ENSMUSG00000099599	0.223953	0	0	0	Gm28548	lincRNA	chr9:104361832-104385031:+	--
ENSMUSG00000099696	0.0188762	0	0	0	2900052N01Rik	lincRNA	chr9:46913493-46927366:+	--
ENSMUSG00000099924	0.0537304	0	0	0.00545779	Gm28320	sense_intronic	chr1:51148309-51150581:+	--
ENSMUSG00000100053	0.0241286	0	0	0	Gm28154	antisense	chr1:17615084-17641081:-	--
ENSMUSG00000100151	0.0365875	0	0.00591532	0	Gm28382	lincRNA	chr1:91483024-91484774:+	--
ENSMUSG00000100183	0	0.14736	0.0777376	0.0976816	Gm28512	sense_intronic	chr1:153750682-153751547:+	--
ENSMUSG00000100616	0.595752	0.0304304	0.0722391	0	Gm28076	lincRNA	chr7:37137011-37140382:-	--
ENSMUSG00000100620	0.0804995	0.253759	0.323511	0.294369	Gm28277	sense_intronic	chr1:135409622-135414186:-	--
ENSMUSG00000100733	0.031635	0.00831027	0.00657594	0.0110174	4932411K12Rik	lincRNA	chr13:101254294-101464160:+	--
ENSMUSG00000100813	0.0194846	0.0716582	0.0882051	0.0712508	Gm28874	lincRNA	chr4:132265708-132268841:+	--
ENSMUSG00000101342	0.52401	0	0	0	Gm28078	lincRNA	chr7:37119993-37128692:-	--
ENSMUSG00000101451	0.00505084	0.142411	0.0440963	0.0430962	Gm29430	antisense	chr6:52183110-52189925:+	--
ENSMUSG00000101481	0.120265	0	0	0	1700123O21Rik	sense_intronic	chr16:5975585-5998496:+	--
ENSMUSG00000101555	0.0713523	0	0.0125847	0	Gm28731	antisense	chr9:69988400-69989968:-	--
ENSMUSG00000101731	0.0347353	0	0	0	3830432H09Rik	lincRNA	chr1:119529480-119536165:-	--
ENSMUSG00000101768	0.084577	0	0	0	Gm28694	lincRNA	chr1:156972760-157054034:-	--
ENSMUSG00000101845	0.280906	0	0	0	Gm28198	antisense	chr7:127559142-127573116:-	--
ENSMUSG00000102080	0.0425326	0	0	0	Gm5092	sense_overlapping	chr17:21091208-21103347:+	--
ENSMUSG00000103164	0.0675493	0.303631	0.39316	0.329351	Gm38150	lincRNA	chr9:107594440-107594891:+	--
ENSMUSG00000103288	0.509816	0	8.24249	0	Gm37273	antisense	chr1:162983014-163066682:+	--
ENSMUSG00000104222	1.59085	0.157993	0.136741	0.0589105	Gm7292	lincRNA	chr6:117716342-117718868:+	--
ENSMUSG00000104583	0.331673	1.02402	1.14993	1.01071	Gm42701	sense_intronic	chr3:104144199-104145855:-	--
ENSMUSG00000104721	0.0445597	0.371454	0.59651	0.260712	Gm42696	sense_intronic	chr3:104057000-104058141:-	--
ENSMUSG00000104835	0.229854	0.0156543	0.0743238	0	Gm5547	lincRNA	chr3:105815540-105817357:+	--
ENSMUSG00000105034	0.115216	0	0	0	Gm43348	lincRNA	chr3:82794975-82812234:-	--
ENSMUSG00000105083	0.0552788	0.768015	0.524318	0.576481	Gm42699	sense_intronic	chr3:104114039-104115695:-	--
ENSMUSG00000105229	0.350699	0.140382	0.902565	0.13086	Gm43149	sense_intronic	chr3:103765695-103767116:-	--
ENSMUSG00000105789	0.151676	0.0185939	0.0441401	0	Gm42997	lincRNA	chr3:130730460-130771643:+	--
ENSMUSG00000105818	0.70791	1.63877	1.83655	1.70973	Gm43256	sense_intronic	chr3:104187103-104190193:-	--
ENSMUSG00000105820	0.129856	0	0	0	Gm43400	antisense	chr3:153913095-153916858:+	--
ENSMUSG00000106036	0.177772	0	0	0.0180576	Gm43608	lincRNA	chr3:121701501-121710246:-	--
ENSMUSG00000106053	0.150883	0	0	0	Gm20752	lincRNA	chr3:159076364-159308081:+	--
ENSMUSG00000106251	0.232627	0.609961	0.488933	0.559235	Gm42658	sense_intronic	chr3:104826330-104827904:-	--
ENSMUSG00000106300	0	0.159307	0.0983886	0.0309077	Gm42765	antisense	chr5:30529457-30543830:+	--
ENSMUSG00000106492	0.0900658	0	0.00970765	0	Gm29707	lincRNA	chr5:102070218-102071782:+	--
ENSMUSG00000107352	0.0155428	0	0	0	Gm43660	lincRNA	chr5:31560812-31569072:-	--
ENSMUSG00000107355	0.105808	0	0.032075	0.0161216	AI839979	lincRNA	chr5:31569595-31571397:-	--
ENSMUSG00000107406	0.376245	0.0230619	0.0729958	0.0229308	1700040L08Rik	antisense	chr6:71543192-71544114:-	--
ENSMUSG00000108006	0.0721804	0.49552	0.29408	0.422317	Gm44418	antisense	chr6:87277745-87279750:+	--
ENSMUSG00000108132	0.0239131	0.0029315	0	0	Gm44175	lincRNA	chr6:71354351-71360829:-	--
ENSMUSG00000108197	0.167944	0	0	0	Gm44214	lincRNA	chr6:86687823-86688428:-	--
ENSMUSG00000108371	2.49347	0.77978	0.567679	0.961431	Gm45050	lincRNA	chr6:72162849-72167707:+	--
ENSMUSG00000108413	0.117917	0.00498461	0.0394434	0	BC026762	lincRNA	chr7:26009889-26012391:+	--
ENSMUSG00000108532	0.00978286	0	0	0	Gm44905	lincRNA	chr7:94042691-94709171:+	--
ENSMUSG00000108546	0.247025	0	0.0479256	0.0602212	Gm44662	lincRNA	chr7:30916983-30946824:+	--
ENSMUSG00000108801	0.113179	0	0	0	Gm44514	lincRNA	chr7:127691935-127700793:+	--
ENSMUSG00000108822	2.37061	0.326793	0.489478	1.04443	Gm44787	lincRNA	chr11:79258586-79273893:-	--
ENSMUSG00000108884	0.734454	1.93812	0.0138791	3.45891	Gm45792	antisense	chr7:119626519-119631058:-	--
ENSMUSG00000109083	0.218153	0	0.00668277	0	Gm44992	lincRNA	chr7:39869131-39978319:-	--
ENSMUSG00000109311	0.0291304	0	0.00353226	0	AI314278	lincRNA	chr7:89426306-89441928:+	--
ENSMUSG00000109341	0.108271	0	0.0161582	0.0203037	Gm44556	antisense	chr7:84338095-84347869:+	--
ENSMUSG00000109781	0.0496864	0	0	0	Gm45509	lincRNA	chr7:16406755-16407983:-	--
ENSMUSG00000110242	0.045359	0	0	0	G630064G18Rik	antisense	chr8:36985573-37024238:-	--
ENSMUSG00000110316	0.0612177	0.187616	0	0.205205	Gm45311	sense_intronic	chr7:46511451-46512780:-	--
ENSMUSG00000110373	0.0608906	0	0	0	Gm45260	antisense	chr4:76451231-76490113:+	--
ENSMUSG00000110388	0.0661517	0	0	0	Gm30329	antisense	chr8:79225930-79233224:+	--
ENSMUSG00000110537	0.00576136	0.586215	0.0447107	0.221214	Gm4316	lincRNA	chr8:123165255-123178765:+	--
ENSMUSG00000110661	0.0454462	0.00309513	0.00489838	0.0153877	Gm45759	lincRNA	chr8:95828598-95833675:-	--
ENSMUSG00000110702	0.011157	0.0492385	0.0303042	0.0598383	Gm45767	antisense	chr8:94675606-94680166:+	--
ENSMUSG00000110712	0.127019	0	0.038505	0	Gm45835	antisense	chr1:72641188-72642963:+	--
ENSMUSG00000111229	0.0207562	0	0	0	AC126459.2	lincRNA	chr9:44011735-44041059:-	--
ENSMUSG00000111253	0.171209	0	0	0	AC159886.3	lincRNA	chr9:77807036-77809793:-	--
ENSMUSG00000111329	0.112606	0.315527	0.348509	0	AC122273.1	antisense	chr9:45954101-45955998:+	--
ENSMUSG00000111417	0.0317714	0.259656	0.236287	0.438906	AC158987.1	lincRNA	chr9:78520546-78522157:+	--
ENSMUSG00000111531	0.0173973	0.213273	0.202516	0.212061	AC161054.2	lincRNA	chr10:93317403-93322725:+	--
ENSMUSG00000111840	0.0178447	0	0	0	AC159809.2	lincRNA	chr9:85332352-85348065:-	--
ENSMUSG00000111862	0.04893	0	0.0079108	0	AC160052.1	sense_intronic	chr9:51215733-51219521:+	--
ENSMUSG00000111929	0.479779	0.112626	0.198048	0.0497716	AC154585.1	antisense	chr12:79150936-79151932:-	--
ENSMUSG00000111962	0.0291478	0	0	0	AC152947.1	lincRNA	chr10:99609171-99658134:+	--
ENSMUSG00000112009	0.499107	1.1439	1.36828	1.63997	AC140264.2	sense_intronic	chr10:121423664-121462694:-	--
ENSMUSG00000112041	0.0712955	0.00546256	0.0259352	0	AC104880.1	lincRNA	chr12:11185993-11204502:-	--
ENSMUSG00000112198	0.0415405	0	0	0	AC160028.2	lincRNA	chr10:118803719-118805290:-	--
ENSMUSG00000112275	0.0729892	0	0.00442522	0	AC122293.2	lincRNA	chr10:68313008-68326978:+	--
ENSMUSG00000112276	0.145623	0.456215	0.447331	0.305701	AC117236.1	antisense	chr12:8511201-8562681:+	--
ENSMUSG00000112290	0.118113	0	0	0	AC153938.2	lincRNA	chr10:96310131-96362367:+	--
ENSMUSG00000112384	0.55737	1.48192	3.58815	0.202936	AC153821.2	lincRNA	chr10:99267686-99270446:-	--
ENSMUSG00000112532	0.0442837	0.121348	0.331027	0.158761	AC147634.1	lincRNA	chr10:108417251-108453297:+	--
ENSMUSG00000113094	0.197923	0.446957	0.828618	1.25706	AC159649.2	sense_intronic	chr12:84214365-84216137:-	--
ENSMUSG00000113185	0.0994538	0.24384	0.353744	0.575828	AC124687.2	lincRNA	chr13:34610827-34612246:-	--
ENSMUSG00000113203	0.0137906	0.338116	0.187287	0.336194	CT009757.1	sense_intronic	chr13:63142494-63143934:+	--
ENSMUSG00000113241	0.0430108	0	0	0	CT010465.2	lincRNA	chr13:7139127-7175925:-	--
ENSMUSG00000113246	0.08558	0.0242105	0.00638595	0	AC155232.1	lincRNA	chr12:17436618-17446443:+	--
ENSMUSG00000113587	0.0127857	0.15674	0.198446	0.171434	CT010478.2	lincRNA	chr12:25150915-25209377:+	--
ENSMUSG00000113781	0.947898	0.0611592	0	0.243246	AC152827.4	lincRNA	chr12:110597156-110597359:-	--
ENSMUSG00000113811	0.00585583	0.114858	0.0795267	0.139188	CT009546.3	lincRNA	chr13:13862534-13893979:+	--
ENSMUSG00000114138	0.0413717	0	0	0	AC153144.3	antisense	chr13:9684226-9689544:+	--
ENSMUSG00000000031	0.574948	2.51423	1.56914	1.51147	H19	lincRNA	chr7:142575529-142578143:-	--
MSTRG.100038	0.620575	0	0	0	--	linc	chr6:145347413-145351775:+	--
MSTRG.10013	0.0129686	0	0	0	--	antisense	chr10:13975908-13999806:-	--
MSTRG.100252	0.669193	1.61105	2.21679	1.64528	--	antisense	chr6:149114041-149156446:-	--
MSTRG.10052	0.238161	0	0	0	--	linc	chr10:17674806-17678021:+	--
MSTRG.101760	0.228473	0	0.0705191	0	--	antisense	chr7:28379686-28380856:+	--
MSTRG.102186	1.16783	0.446591	0.343292	0.32733	--	linc	chr7:35125145-35130394:-	--
MSTRG.102369	0.408058	0	0	0	--	linc	chr7:37136016-37136462:-	--
MSTRG.102372	0.286688	0	0	0	--	linc	chr7:37155093-37157639:-	--
MSTRG.102970	0.298848	0.0203532	0.0483165	0	--	antisense	chr7:46841494-46843357:-	--
MSTRG.103030	0.0957554	0.469545	0	0	--	antisense	chr7:48843791-48857256:+	--
MSTRG.103644	0.205605	0	0	0	--	linc	chr7:66727437-66733469:+	--
MSTRG.10448	0.238767	0	0	0	--	linc	chr10:24457683-24496816:-	--
MSTRG.105338	0.285193	0.723409	1.01537	0.641635	--	antisense	chr7:101547879-101563690:+	--
MSTRG.105660	0.843328	0	0	0	--	linc	chr7:109117850-109124288:-	--
MSTRG.106788	0.297393	2.23469	2.6231	0.651158	--	linc	chr7:127647272-127653686:-	--
MSTRG.109131	0.240886	0	0	0	--	antisense	chr8:34082176-34092268:+	--
MSTRG.109146	0.0112957	0.429269	0.0767023	0.082612	--	linc	chr8:34488218-34492539:+	--
MSTRG.109208	0	0.331968	0.394031	0.275068	--	linc	chr8:35410747-35414893:+	--
MSTRG.109239	0.378695	0	0	0	--	linc	chr8:36517306-36517541:+	--
MSTRG.109951	0.383498	0	0	0	--	linc	chr8:56616701-56617174:+	--
MSTRG.110670	0.0987896	0.0206138	0.0244676	0.035869	--	antisense	chr8:70719079-70723920:-	--
MSTRG.111769	0.322752	0	0	0	--	linc	chr8:88931679-88934827:-	--
MSTRG.112300	0.144763	0.0540107	0.05495	0.291535	--	antisense	chr8:105145312-105147330:-	--
MSTRG.112866	0.31286	0.987891	0.089668	1.48786	--	linc	chr8:114125213-114131655:-	--
MSTRG.113027	0.237513	0	0.0576002	0.651401	--	linc	chr8:119423775-119429084:-	--
MSTRG.113588	0.282707	0	0	0	--	linc	chr9:7873537-7876036:+	--
MSTRG.113665	0.273361	0	0	0	--	linc	chr9:12739996-12741115:-	--
MSTRG.115075	0.132174	0.891177	0.935981	0.418889	--	antisense	chr9:42271639-42274825:+	--
MSTRG.117317	0.214262	0	0	0	--	linc	chr9:74711288-74711981:-	--
MSTRG.117436	0.370701	1.21873	0	1.91013	--	antisense	chr9:76258001-76270531:+	--
MSTRG.117596	0.175656	0.443666	0.547911	0.361775	--	linc	chr9:78505468-78514554:+	--
MSTRG.117762	0.161685	0.348206	0.00423902	0.623208	--	antisense	chr9:83117714-83126178:+	--
MSTRG.118294	0.502491	1.95556	0.0928465	2.275	--	linc	chr9:95581478-95594070:+	--
MSTRG.119162	0.15893	0.627793	0.485354	0.896874	--	linc	chr9:106265217-106275813:+	--
MSTRG.120366	0.0293721	0.744148	0.284926	0.119342	--	linc	chrCHR_MG4180_PATCH:109540964-109572209:+	--
MSTRG.120776	0.991422	3.42028	2.00858	2.1175	--	linc	chrX:9328969-9332651:-	--
MSTRG.121018	0.236423	0.662468	0.622503	0.837101	--	antisense	chr8:121625410-121626686:-	--
MSTRG.121122	0.19762	0	0	0	--	antisense	chr8:122523622-122524571:+	--
MSTRG.121624	0.359627	0	0	0	--	linc	chrX:19700516-19704042:+	--
MSTRG.122123	0.153802	6.03019	0.612219	1.6711	--	antisense	chrX:38958973-38963919:-	--
MSTRG.123295	0.0264578	0.389214	0.094107	0.150501	--	linc	chrX:101462794-101465104:+	--
MSTRG.12364	0.245084	0.52183	0.538055	0.660372	--	antisense	chr10:69313042-69320956:-	--
MSTRG.124093	0.454662	0	0	0	--	linc	chrX:140520969-140528848:+	--
MSTRG.125036	0.4223	0	0	0	--	linc	chrY:14181811-14184659:+	--
MSTRG.125184	0.197346	0.933144	0	4.12373	--	antisense	chrX:169981775-169983419:-	--
MSTRG.12605	0.271398	0	0	0	--	linc	chr10:75891676-75892838:-	--
MSTRG.13714	0.0561669	0.28919	0.512159	0.314931	--	antisense	chr10:84857932-84860572:-	--
MSTRG.14352	0.297037	0.0766604	0.652112	0	--	antisense	chr10:96223549-96231795:-	--
MSTRG.14786	0.00576299	0.0989076	0.13976	0.358258	--	linc	chr10:111584605-111586582:+	--
MSTRG.15098	0.444429	0.21793	0.172448	0	--	linc	chr10:117497102-117498007:-	--
MSTRG.16286	0.171049	0	0	0	--	linc	chr11:5457376-5462729:+	--
MSTRG.21159	0.187247	0.540107	0.576975	0.42963	--	antisense	chr11:94108026-94138995:-	--
MSTRG.22331	0.290784	0.0356471	0	0.0354445	--	linc	chr11:107205121-107205740:+	--
MSTRG.22982	0.246228	0.543331	0.573252	0.920413	--	antisense	chr11:115910178-115913965:-	--
MSTRG.23215	0.169624	0.646929	0.767875	0.436492	--	antisense	chr11:119012901-119023435:-	--
MSTRG.23443	0.107983	0.496412	0.279333	0.723932	--	linc	chr11:120522878-120525500:+	--
MSTRG.23738	0.24823	0	0	0	--	linc	chr12:5075692-5076220:+	--
MSTRG.24438	0.458301	0	0	0	--	linc	chr12:21496562-21501093:+	--
MSTRG.24592	0.1181	0.323622	0.350429	0.41493	--	linc	chr12:25140278-25144136:+	--
MSTRG.24596	0	0.338558	0.0793783	0.29923	--	linc	chr12:25221118-25227258:+	--
MSTRG.24704	0.221249	0	0	0	--	linc	chr12:28072145-28084115:-	--
MSTRG.24841	0.416514	0.133201	0.17567	0.022074	--	linc	chr12:28689018-28689606:+	--
MSTRG.24995	0.482452	0.0844909	2.85706	0.112014	--	linc	chr12:32751393-32770988:-	--
MSTRG.25855	0.335889	0	0	0	--	linc	chr12:59222858-59227067:-	--
MSTRG.26354	0.175979	0	0	0	--	antisense	chr12:76312564-76315341:-	--
MSTRG.26604	0.420141	0.0307492	0.00608298	0.0687924	--	antisense	chr12:79145438-79148045:-	--
MSTRG.26674	0.354769	0	0.0215091	0.0270274	--	linc	chr12:80328972-80330922:-	--
MSTRG.27504	0.381654	0	0	0.0387674	--	antisense	chr12:91076209-91078994:-	--
MSTRG.28230	0.00833533	0.245238	0.088943	0.528329	--	linc	chr12:109717370-109718743:+	--
MSTRG.28735	0.307078	0.0806669	0.0744706	0.0133681	--	linc	chr12:111909703-111911315:-	--
MSTRG.29270	0	0.194565	0.23094	0.314371	--	linc	chr13:3680940-3687737:-	--
MSTRG.29332	0.238534	0	0	0	--	linc	chr13:5811500-5813570:-	--
MSTRG.30851	0.400355	0	0	0.0513688	--	linc	chr13:37542922-37549441:+	--
MSTRG.30858	0.0444429	0.299654	0.237117	0.189605	--	linc	chr13:37581118-37598725:+	--
MSTRG.30866	0.423023	1.66251	1.35176	2.19903	--	linc	chr13:37596969-37598207:-	--
MSTRG.30996	0.32438	0	0	0.0494246	--	linc	chr13:38971123-38997722:+	--
MSTRG.31658	0.00989061	0.40012	0.230267	0.289343	--	linc	chr13:51078470-51094698:-	--
MSTRG.3181	0.224296	0.0343705	0.0543949	0	--	linc	chr1:71672896-71674979:+	--
MSTRG.3204	0.192314	0.0372247	0	0.789613	--	linc	chr1:71813634-71832184:+	--
MSTRG.32195	0.025317	0.217252	0.257868	0.123438	--	linc	chr13:62291719-62296907:-	--
MSTRG.32343	0.186011	0	0	0	--	linc	chr13:63915445-63917384:+	--
MSTRG.32505	0	0.514706	0.456163	0.102356	--	antisense	chr13:66969882-66974543:-	--
MSTRG.32676	0.0491189	0.863077	0.451068	0.223524	--	linc	chr13:69657694-69661204:+	--
MSTRG.32950	0.0746511	0	0.205178	0.303314	--	linc	chr13:75613590-75621551:-	--
MSTRG.34128	0.19001	0	0.0460802	0	--	linc	chr13:104617067-104618921:+	--
MSTRG.34251	0.0255074	0.187616	0.247436	0.248733	--	linc	chr13:107483423-107488648:+	--
MSTRG.35260	0.471637	0	0	0.181545	--	linc	chr14:18546776-18547242:-	--
MSTRG.36082	0.641066	0.0168283	0.0332907	0.0133861	--	antisense	chr14:33072635-33084391:+	--
MSTRG.36443	0.215681	0	0.0523056	0.788698	--	linc	chr14:45535613-45545040:-	--
MSTRG.36774	0.294998	0	0.0357706	0	--	antisense	chr14:51882613-51884858:-	--
MSTRG.36799	0.300177	0.0876157	0.0970628	0	--	linc	chr14:51955107-51958905:+	--
MSTRG.37598	0.0970367	0.209924	0.227022	0.278308	--	linc	chr14:63091584-63094701:-	--
MSTRG.37750	0.392951	0.0240859	0.0190592	0.0957958	--	antisense	chr14:65351144-65359072:-	--
MSTRG.38375	0.229183	0.114463	0.107043	0.0827727	--	linc	chr14:77126101-77127507:+	--
MSTRG.38484	0.34974	0	0	0	--	linc	chr14:81156494-81157559:+	--
MSTRG.3864	0.233517	0.644101	0.679572	0	--	linc	chr1:86319467-86320064:+	--
MSTRG.38647	0.204229	0	0	0	--	linc	chr14:100449461-100449959:+	--
MSTRG.39471	0.198101	0.455346	0.43238	0	--	linc	chr15:6025049-6044639:-	--
MSTRG.39662	0.0902255	0.0147476	0.221727	0.197961	--	linc	chr15:10869686-10879100:-	--
MSTRG.40145	0.454991	0	0.139379	0.175137	--	linc	chr15:27459892-27461388:-	--
MSTRG.40508	0.05824	0.196339	0.162426	0.337204	--	linc	chr15:36584170-36586094:-	--
MSTRG.41100	0.222864	0	0	0	--	linc	chr15:50996809-50999811:-	--
MSTRG.41581	0.26157	0	0.023067	0.579699	--	linc	chr15:58018393-58020325:-	--
MSTRG.41738	0.154647	0.379162	0.458157	0.427954	--	linc	chr15:61453859-61512922:+	--
MSTRG.41754	0.00671335	0.707769	0.104197	0.090014	--	linc	chr15:62670446-62744002:-	--
MSTRG.4264	0.336577	0.039296	0.0466426	0.0976816	--	linc	chr1:91414521-91415677:-	--
MSTRG.43122	0.291378	0.0765428	0	0.0507385	--	linc	chr15:83271012-83288610:-	--
MSTRG.43464	0.32438	0	0.0786667	0	--	linc	chr15:88656429-88670788:-	--
MSTRG.43555	0.0354985	0.113146	0.244493	0.315872	--	antisense	chr15:89128553-89133291:+	--
MSTRG.43596	0.254039	0.0681243	0.531369	0.125797	--	linc	chr15:89223022-89224335:+	--
MSTRG.43616	2.82891	0.77216	0.611013	0.511847	--	linc	chr15:89767593-89768911:+	--
MSTRG.44065	0.010747	0.197621	0.208504	0.222698	--	linc	chr15:99457871-99458995:+	--
MSTRG.44935	0.26208	0	0	0	--	antisense	chr16:8488251-8538644:-	--
MSTRG.45176	0.353383	0	0	0	--	linc	chr16:12685468-12699319:-	--
MSTRG.45592	0.144156	0.335769	0.594318	0.0175716	--	linc	chr16:18713446-18719347:+	--
MSTRG.46290	0.409267	0.114851	0.0382662	0.126219	--	antisense	chr16:30969612-30974222:+	--
MSTRG.46319	0.181201	0.0444266	0.416	0	--	linc	chr16:31570528-31584338:+	--
MSTRG.46387	5.10256	0.124425	0.00895075	0	--	linc	chr16:32409634-32410918:+	--
MSTRG.46395	0.579408	0	0.122187	0	--	antisense	chr16:32588819-32592569:+	--
MSTRG.4709	0.263968	0.68315	0.056903	0	--	linc	chr1:105971853-105972746:+	--
MSTRG.47103	0.215776	0	0	0	--	linc	chr16:45361417-45365422:-	--
MSTRG.47753	0.240412	0	0	0	--	linc	chr16:78132453-78151008:-	--
MSTRG.48495	0	0.183658	0.0581316	0.121743	--	linc	chr16:93813584-93819044:-	--
MSTRG.51130	0.384962	0	0.140038	0	--	antisense	chr17:36083963-36087606:+	--
MSTRG.51284	0.33784	0	0.0204827	0	--	linc	chr17:43109714-43117051:-	--
MSTRG.51320	0.376942	0	0.0117953	0	--	antisense	chr17:44035334-44044945:-	--
MSTRG.51344	0	0.336877	0.104725	0.454591	--	linc	chr17:44121673-44124290:+	--
MSTRG.51445	0.248196	1.11047	0.616872	0.613612	--	linc	chr17:45699111-45713626:+	--
MSTRG.51453	0.12684	0.3332	0.263662	0.0220871	--	linc	chr17:45886096-45889321:+	--
MSTRG.51712	0.583144	0.0338116	0.0286663	0.00480277	--	antisense	chr17:49271308-49306171:-	--
MSTRG.53095	0.340713	1.81893	1.3327	1.60763	--	linc	chr17:80783746-80785236:-	--
MSTRG.53315	0.197435	0.890062	1.01322	0.819016	--	linc	chr17:80730776-80733991:-	--
MSTRG.53440	0.0505223	0.220214	0.234156	0.150536	--	linc	chr17:84151240-84156436:-	--
MSTRG.54078	0.433922	0	0	0	--	linc	chr18:10990172-11034405:-	--
MSTRG.54263	0.295856	0	0	0	--	antisense	chr18:12409763-12425253:-	--
MSTRG.54427	0.541167	0.0299607	0.00677371	0.0680923	--	antisense	chr18:14944095-14980324:+	--
MSTRG.54522	0.463982	0.120233	0.142711	0.00459806	--	linc	chr18:20235215-20238044:+	--
MSTRG.54525	0.192027	0	0	0	--	linc	chr18:20543805-20545331:+	--
MSTRG.54783	0.0656609	0.24148	0.254779	0.480215	--	linc	chr18:24430289-24467878:-	--
MSTRG.55212	0.157253	0.354708	0.472888	0.379527	--	linc	chr18:34932180-34936736:+	--
MSTRG.55344	0.245239	0	0	0	--	linc	chr18:36706705-36707183:-	--
MSTRG.56016	0.239903	0.101803	0.11636	0.0899769	--	linc	chr18:49966006-49967150:+	--
MSTRG.56357	0.179035	0	0.0133595	0.453248	--	linc	chr18:59087797-59089589:+	--
MSTRG.56921	0.299185	0.0885305	0.0600467	0.100603	--	antisense	chr18:68267193-68269359:+	--
MSTRG.58110	0	0.370589	0.977493	0.429896	--	antisense	chr19:6922213-6924245:+	--
MSTRG.58361	0.44736	0	0	0	--	linc	chr19:9097571-9102575:+	--
MSTRG.58413	0.0396892	0.250225	0.302505	0.152046	--	linc	chr19:9968357-9972709:+	--
MSTRG.58830	0.569277	0.161048	4.05552	0.128734	--	linc	chr19:17311259-17315700:+	--
MSTRG.59410	0.99292	0.331968	0.197016	0.165041	--	antisense	chr19:29126766-29128402:-	--
MSTRG.5961	0.0613098	0.162846	0.188334	0.32384	--	linc	chr1:133977577-133981034:+	--
MSTRG.59811	0.293016	0	0	0	--	linc	chr19:36533780-36534422:-	--
MSTRG.59891	0.821129	7.33154	9.46113	2.07408	--	antisense	chr19:37676943-37697800:-	--
MSTRG.59892	0.163423	2.45058	2.32556	1.24678	--	antisense	chr19:37685061-37692253:-	--
MSTRG.60040	0.640193	0.12074	0.254779	0.020009	--	linc	chr19:40219465-40220965:-	--
MSTRG.60554	0.281242	0	0	0	--	linc	chr19:48068374-48076902:+	--
MSTRG.60638	0.325478	0	0	0	--	linc	chr19:49532324-49534081:-	--
MSTRG.60971	0.275697	0.120297	0.657272	0.0968295	--	linc	chr19:58463504-58467416:+	--
MSTRG.6123	0.294998	0	0	0	--	linc	chr1:136375709-136399121:+	--
MSTRG.61420	0.100601	0.431641	0.0162647	0.592687	--	linc	chr2:11422240-11447335:-	--
MSTRG.6176	0.0307475	0.207313	0.238615	0.580925	--	linc	chr1:136662136-136670156:+	--
MSTRG.62582	0.178682	0.565868	0.664438	0.571727	--	linc	chr2:27581400-27583370:+	--
MSTRG.62992	0.0655669	0.303651	0.487627	0	--	antisense	chr2:30962943-30964682:+	--
MSTRG.63575	0.185044	0.418246	0.0729232	0.585035	--	antisense	chr2:38497779-38502663:-	--
MSTRG.65582	0.045233	0.443608	0.30715	0.303247	--	linc	chr2:90580820-90586464:+	--
MSTRG.65627	0.177927	0	0.0172599	0	--	antisense	chr2:91568609-91569708:-	--
MSTRG.65675	0.2368	1.05422	0.493271	0.714011	--	linc	chr2:91242783-91254794:+	--
MSTRG.66125	0.952083	0.442714	0.318473	0.240108	--	linc	chr2:104128988-104133586:+	--
MSTRG.66230	0.321133	0.0151414	0.131795	0.150553	--	linc	chr2:105439624-105446173:+	--
MSTRG.66413	0.449211	0.120463	0.0817049	0.102667	--	antisense	chr2:110318916-110386838:+	--
MSTRG.671	0	0.143079	0.271725	0.369891	--	linc	chr1:24108086-24115108:+	--
MSTRG.67857	0.255233	0	0	0	--	antisense	chr2:132927277-132936345:+	--
MSTRG.67911	0.225395	0.59513	0.0672755	0.464944	--	antisense	chr2:135368909-135369582:+	--
MSTRG.67929	0.347522	0.0521665	0.0963188	0.13832	--	linc	chr2:136444661-136448818:-	--
MSTRG.69364	0.168068	0	0.03623	0	--	linc	chr2:161368903-161369526:-	--
MSTRG.69848	1.20522	0.14924	0.40152	0.37098	--	linc	chr2:167846909-167848036:-	--
MSTRG.70100	0.0736162	0.338422	0.178529	0.201899	--	antisense	chr2:169816013-169818500:+	--
MSTRG.71067	0.323395	0	0.0369072	0.023188	--	linc	chr3:20474783-20475341:-	--
MSTRG.71100	0.652892	0.141243	0	0.0702202	--	linc	chr3:21956772-21964646:-	--
MSTRG.7176	0.313842	0	0.010873	0	--	antisense	chr1:162885423-162886756:+	--
MSTRG.72855	0.177513	0	0	0	--	antisense	chr3:67582820-67583392:-	--
MSTRG.73194	0.457413	0.140185	0.138661	0.0348471	--	antisense	chr3:81962855-81981169:+	--
MSTRG.73424	0.0890354	0.201504	0.312258	0.258797	--	linc	chr3:87509863-87513152:+	--
MSTRG.7380	0.219206	0	0	0	--	antisense	chr1:164327598-164334706:-	--
MSTRG.74751	0.115828	0.454379	0.00749065	0.442383	--	linc	chr3:104568594-104571788:+	--
MSTRG.76622	0.357103	0	0	0	--	linc	chr3:144936050-144938904:-	--
MSTRG.76865	0.465634	0	0	0	--	linc	chr3:152702733-152709688:+	--
MSTRG.77081	0.749236	2.95594	1.67127	3.23119	--	linc	chr4:3187112-3236548:-	--
MSTRG.77324	0.025047	0.12282	0.332059	0.641141	--	linc	chr4:8638977-8640351:-	--
MSTRG.77491	2.40601	0.0758449	0.17338	0.159207	--	linc	chr4:12235023-12238029:+	--
MSTRG.79092	0.181201	0.462778	0.952113	0.441741	--	antisense	chr4:46863978-46877797:+	--
MSTRG.79730	0.183259	0.673971	0.0444429	0.422826	--	antisense	chr4:62158742-62196531:+	--
MSTRG.81372	0.15548	1.31833	1.0432	0.552762	--	linc	chr4:106168223-106185083:-	--
MSTRG.81388	0.45435	0	0	0	--	linc	chr4:106589395-106590206:-	--
MSTRG.83184	0.172018	0.404361	0.612419	0.501497	--	linc	chr4:133090680-133101598:-	--
MSTRG.83700	0	0.443154	0.161847	0.288107	--	linc	chr4:138462459-138463722:-	--
MSTRG.83704	0.588777	1.53194	1.38707	1.31818	--	antisense	chr4:138457190-138459955:-	--
MSTRG.83905	0.0415405	0.628068	0.631314	0.219418	--	antisense	chr4:141538734-141571584:-	--
MSTRG.84022	2.37814	0.611285	0.34728	0.358452	--	linc	chr4:143979101-143981625:-	--
MSTRG.84040	0.192027	0.540048	0.38899	0.020653	--	linc	chr4:144854500-144892445:-	--
MSTRG.84339	0.0943812	0.308537	0.289924	0.421827	--	linc	chr4:150048210-150048965:+	--
MSTRG.84396	0.0171771	0.0737007	0.249941	0.27219	--	linc	chr4:150657808-150659392:-	--
MSTRG.84414	0.0551622	0.281763	0.0133776	0.285765	--	linc	chr4:150721254-150724862:+	--
MSTRG.84482	0.333322	0.108965	0	0	--	linc	chr4:151862544-151863304:+	--
MSTRG.84618	0.42406	0	0	0	--	linc	chr4:154915683-154916572:+	--
MSTRG.84619	0.149181	0	0	0	--	linc	chr4:154916810-154917592:+	--
MSTRG.85078	0.243043	0	0.0294707	0	--	antisense	chr5:5536375-5548955:+	--
MSTRG.85807	0.368176	0	0	0	--	linc	chr5:21732323-21735696:-	--
MSTRG.86785	0.180132	0	0	0	--	linc	chr5:32121964-32123278:+	--
MSTRG.86946	0.402071	0.0308061	0	0	--	linc	chr5:33976405-33976838:-	--
MSTRG.87963	0.29358	0	0	0	--	linc	chr5:61331623-61331909:-	--
MSTRG.87986	0.58491	0.233038	0.255328	0.231713	--	antisense	chr5:44656786-44657501:-	--
MSTRG.88070	0.115799	0.394326	0.049925	0.392085	--	linc	chr5:64879559-64888948:+	--
MSTRG.88518	0.271398	0	0	0	--	antisense	chr5:72288709-72289466:-	--
MSTRG.8910	0.0848492	0.0328473	0.181945	0.239511	--	linc	chr1:187036126-187044432:-	--
MSTRG.89278	2.08036	0.800095	0.959569	0.932282	--	antisense	chr5:90504321-90515717:-	--
MSTRG.89423	0.13557	0.925943	0.366351	0.377715	--	antisense	chr5:92434350-92436010:+	--
MSTRG.90155	0.0158035	0.135614	0.383256	0.11558	--	linc	chr5:106296308-106321156:-	--
MSTRG.90486	0.318811	0	0	0	--	linc	chr5:109900617-109907756:-	--
MSTRG.90487	0.219657	0	0	0	--	linc	chr5:109900671-109907673:+	--
MSTRG.9062	0.0219341	0.161334	0.468101	0.401042	--	antisense	chr1:191029555-191039929:-	--
MSTRG.91048	0.330079	0	0	0	--	linc	chr5:117400189-117400618:+	--
MSTRG.92039	0.0195344	0.239472	0.303192	0.261922	--	antisense	chr5:130072770-130073863:-	--
MSTRG.9590	0.75712	0.37483	0.098868	0.0532428	--	linc	chr10:8544133-8551268:-	--
MSTRG.9591	0.18393	0	0	0	--	linc	chr10:8544467-8551235:+	--
MSTRG.97361	0.287701	0	0	0	--	linc	chr6:89297621-89299468:+	--
MSTRG.97484	0.0118757	0.3494	0.0633602	0.26056	--	linc	chr6:91295649-91297540:+	--
MSTRG.97897	0.312323	0.0264053	0.0835782	0.0918931	--	antisense	chr6:108028670-108101997:-	--
